# Supplementary material for: Asymmetric synthesis of N-allylic indoles via regio- and enantioselective allylation of aryl hydrazines
Source: PubMed Central journal article supplement (PMC4506507; doi:10.1038/ncomms8616), 2015-07-03
Supplement: ncomms8616-s1.pdf [file ncomms8616-s1.pdf]

## Supplementary Figures

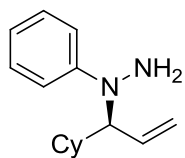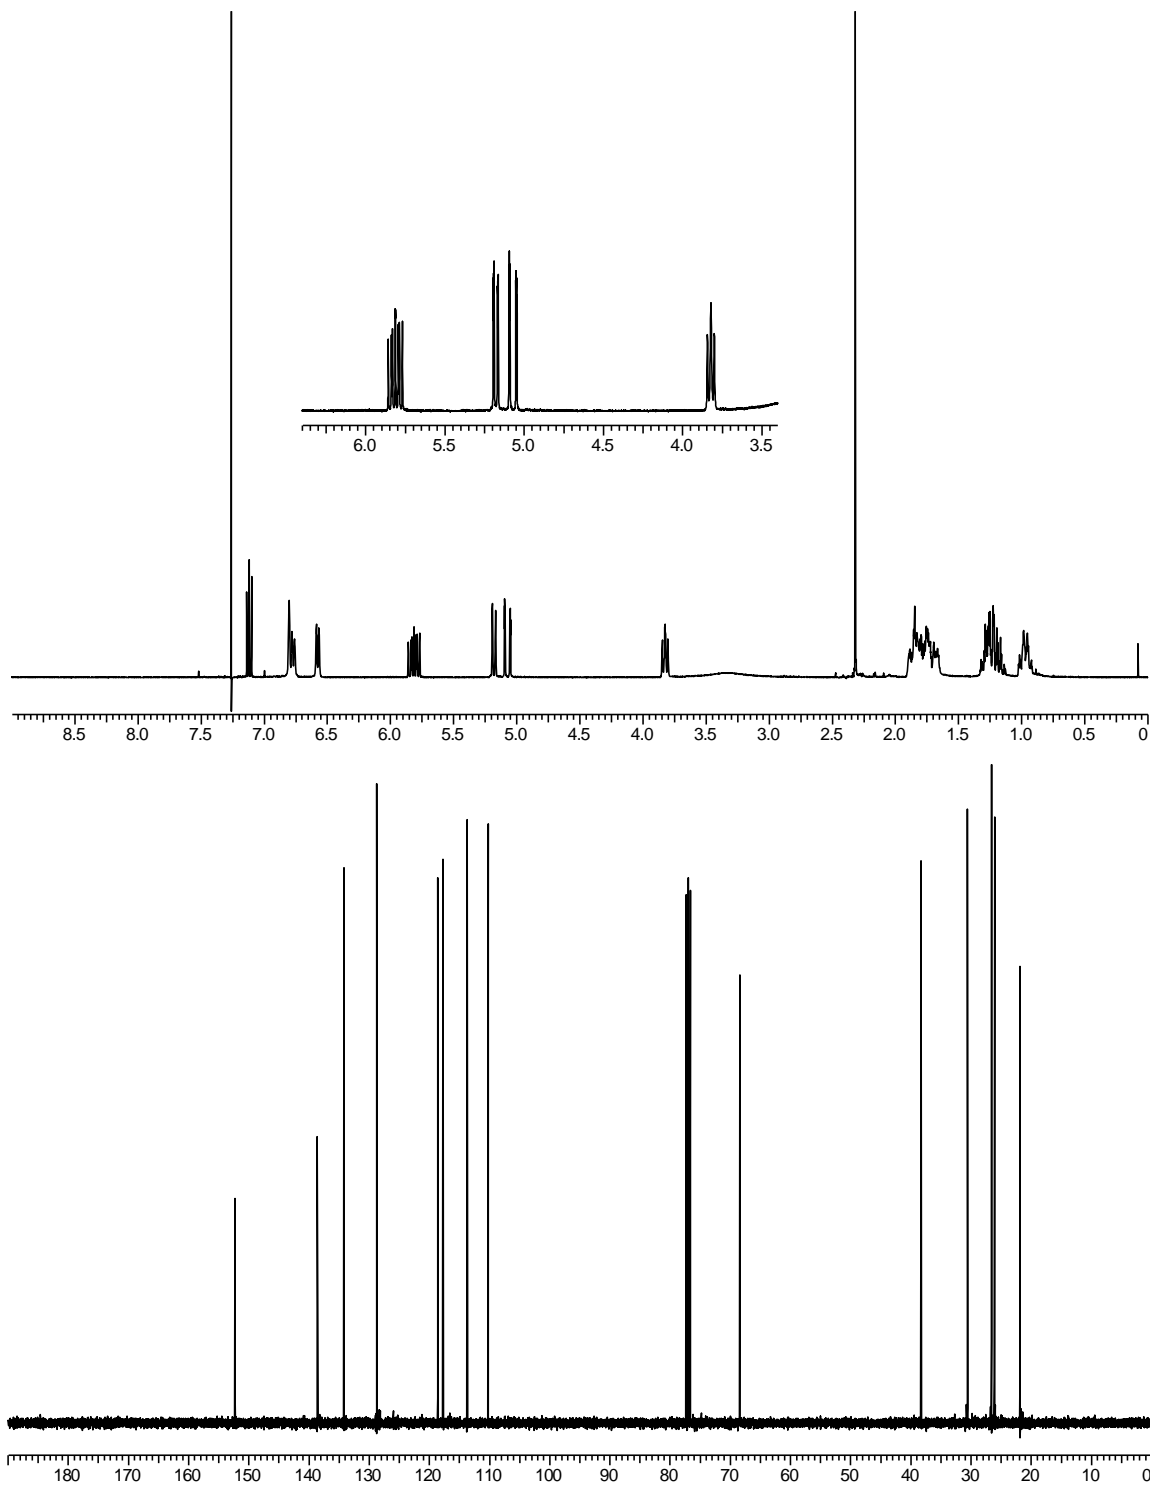

Supplementary figure 1. <sup>1</sup>H and <sup>13</sup>C NMR spectra for product 1a

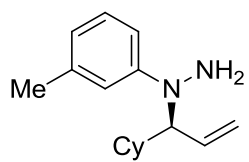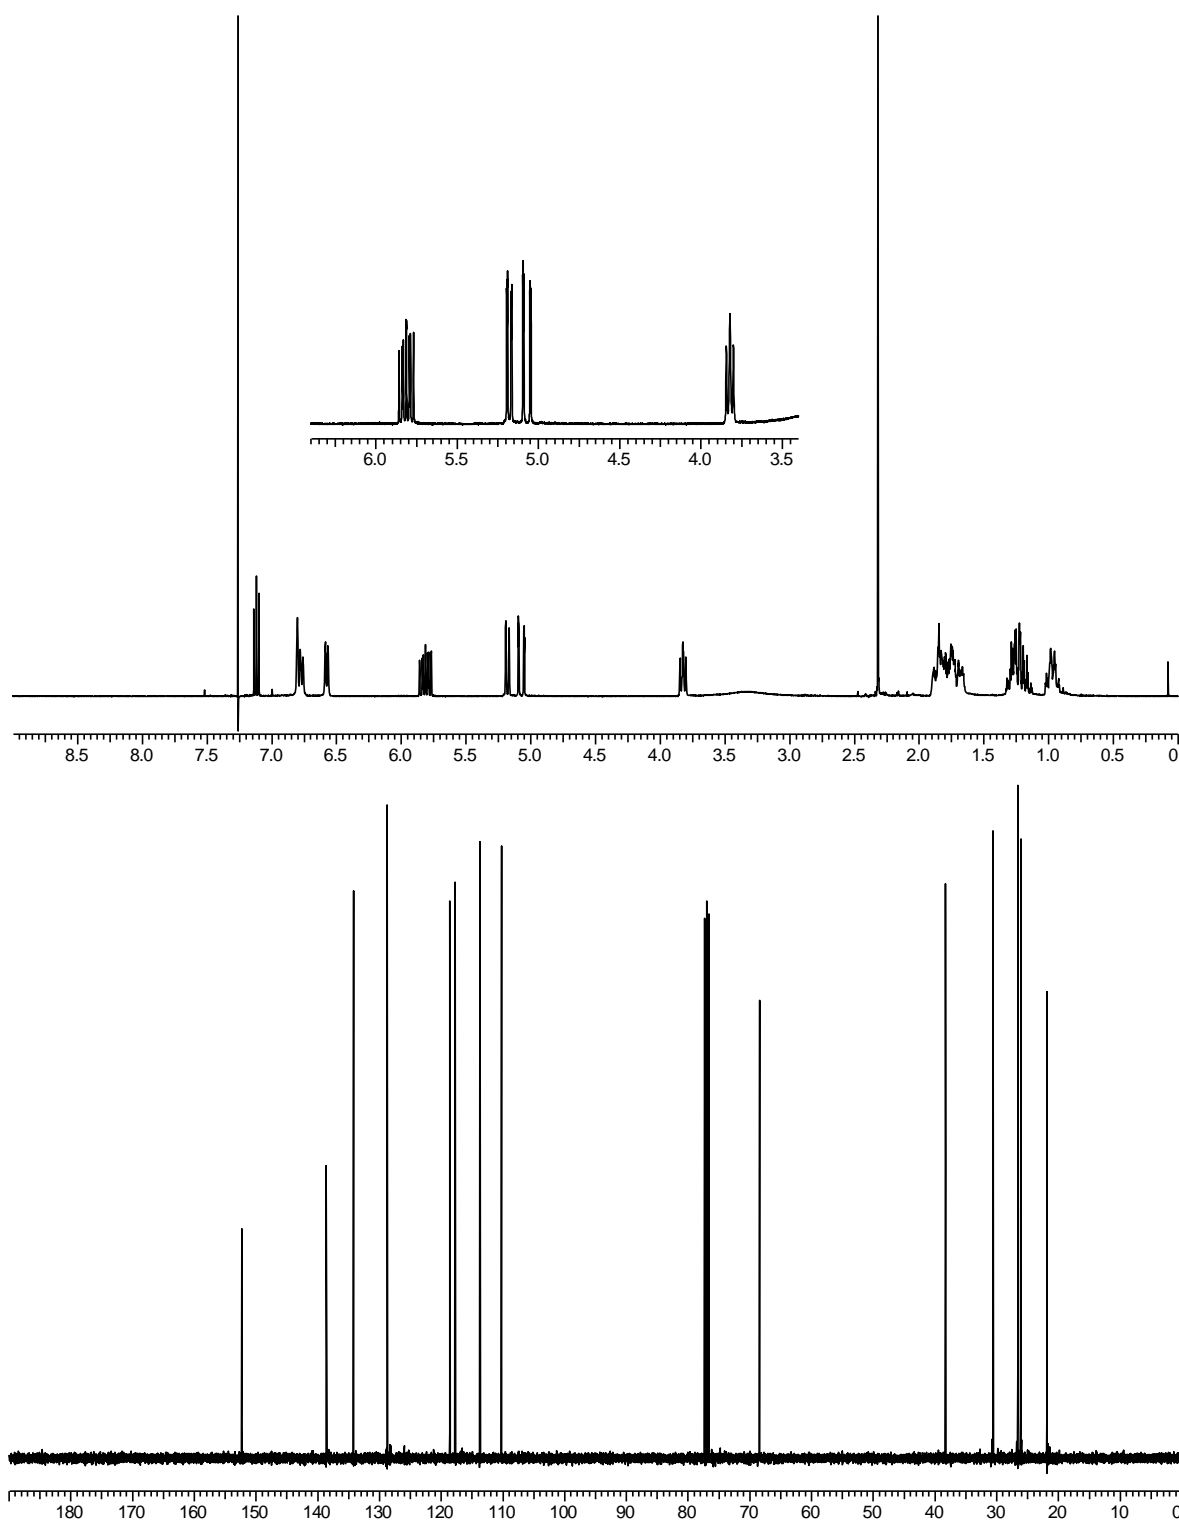

Supplementary figure 2.  $^1\text{H}$  and  $^{13}\text{C}$  NMR spectra for product 1b

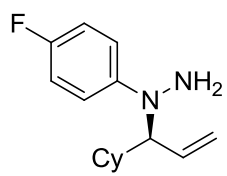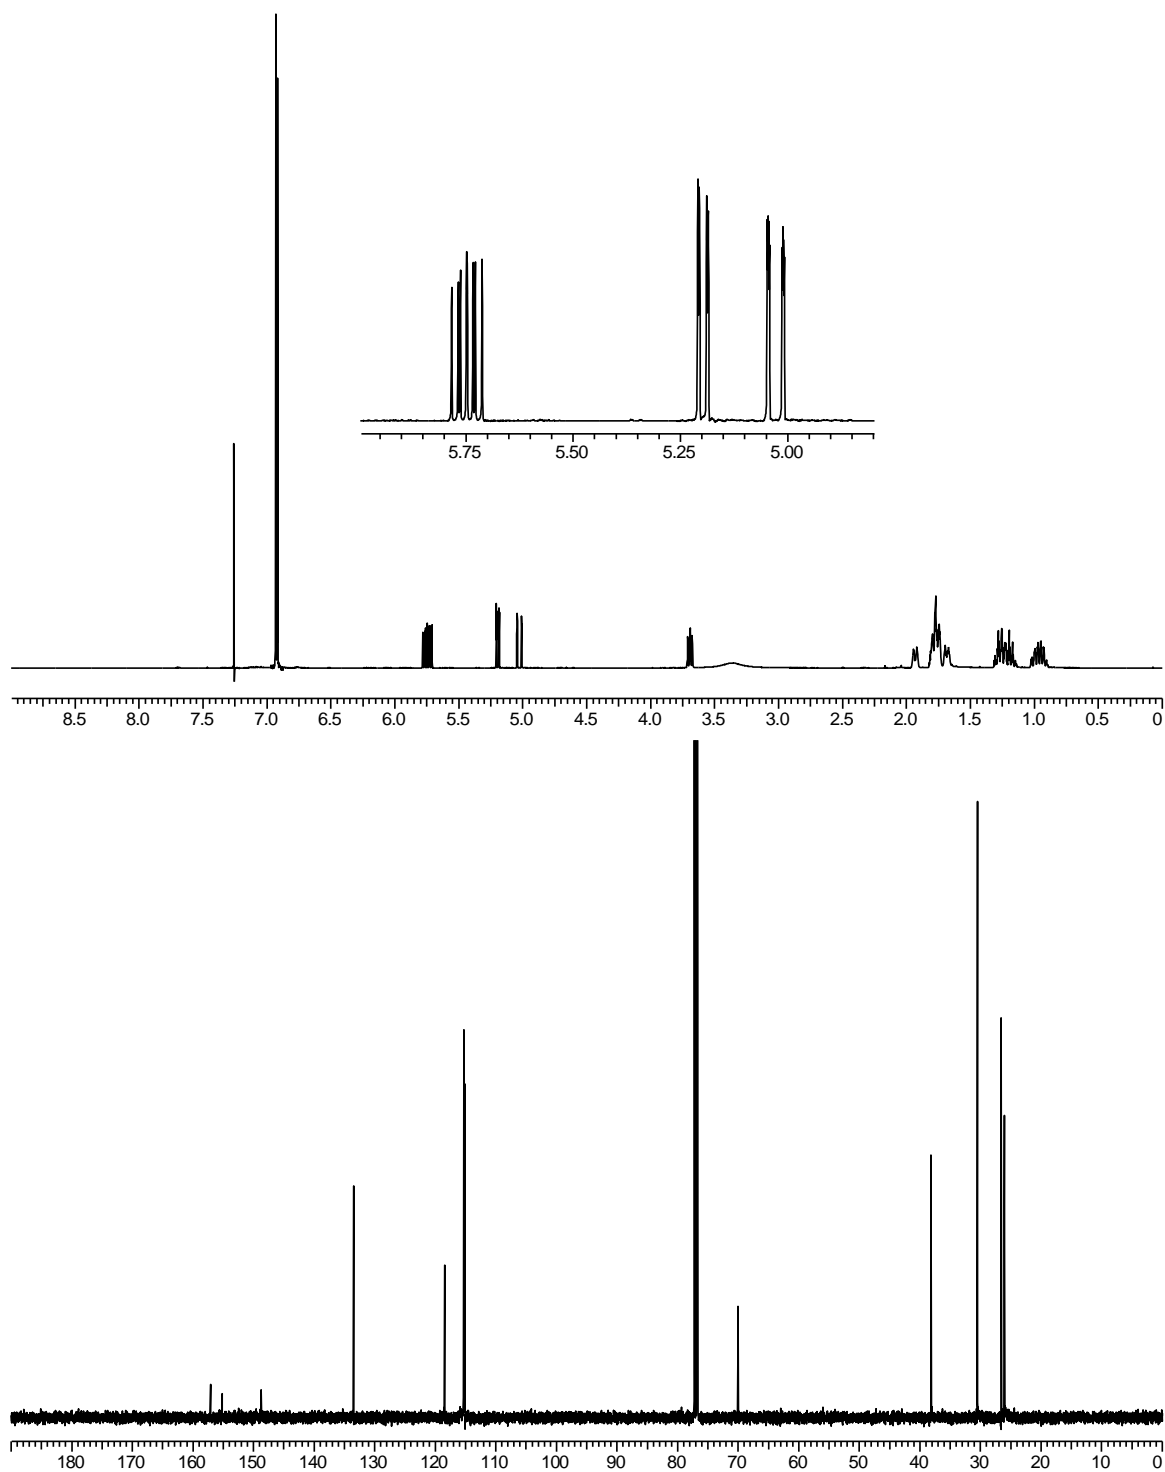

Supplementary figure 3.  $^1\text{H}$  and  $^{13}\text{C}$  NMR spectra for product **1c**

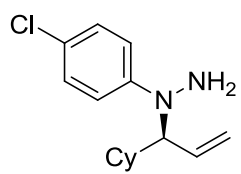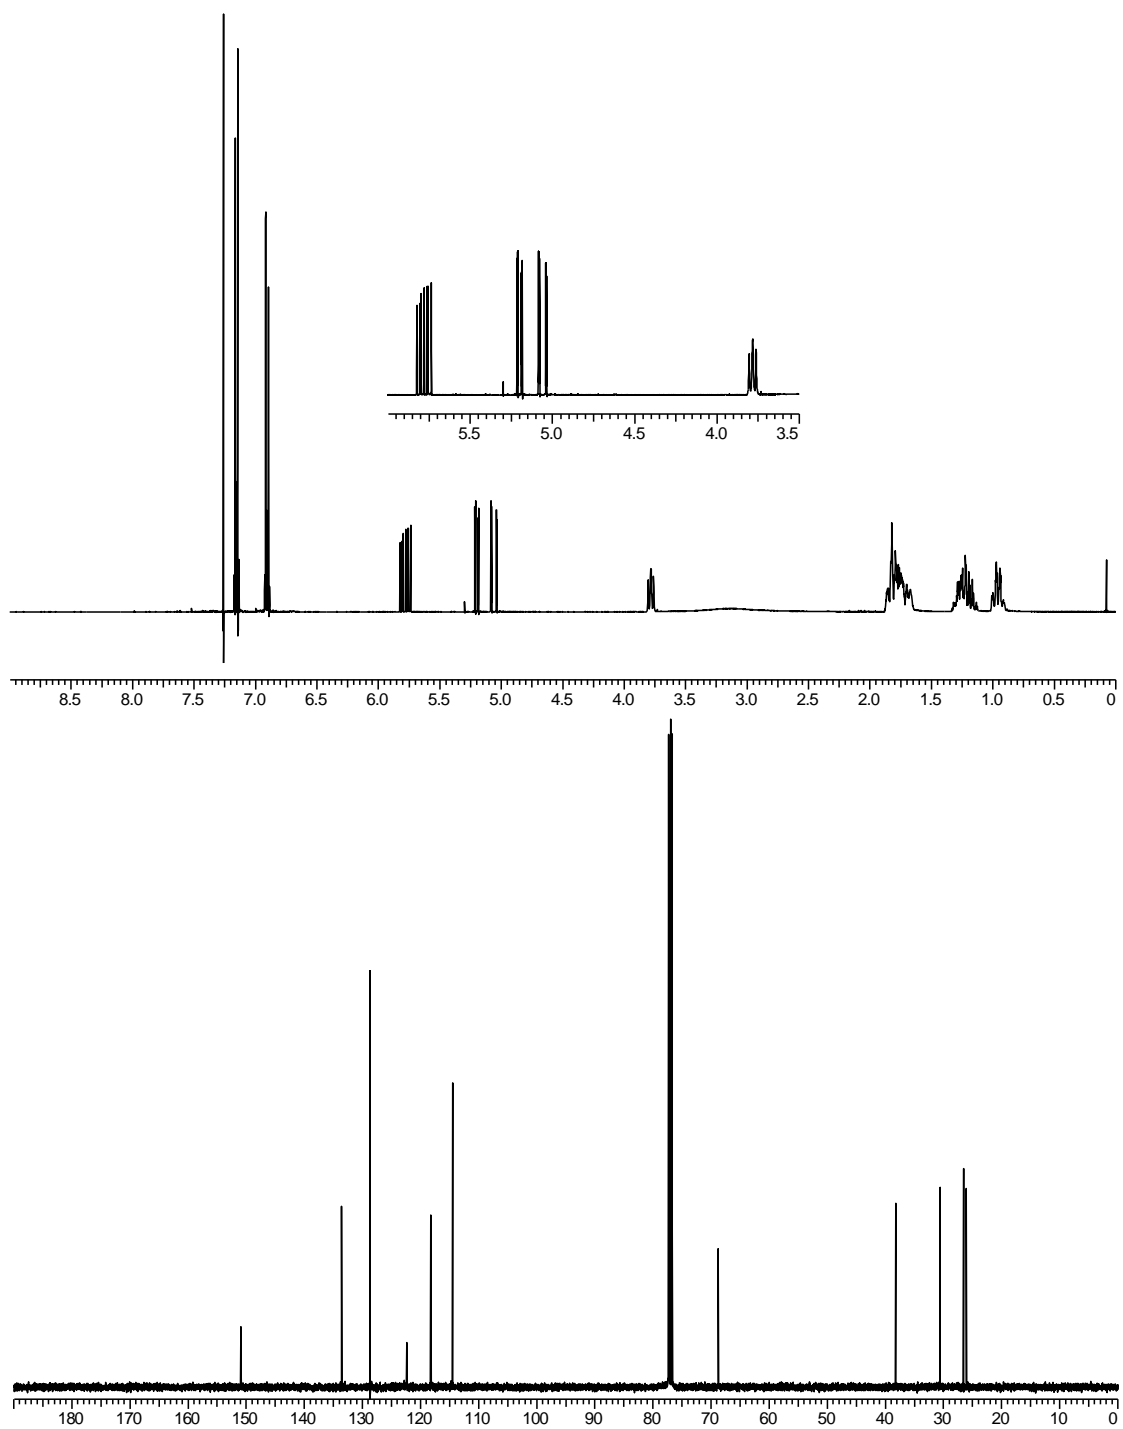

Supplementary figure 4.  $^1\text{H}$  and  $^{13}\text{C}$  NMR spectra for product 1d

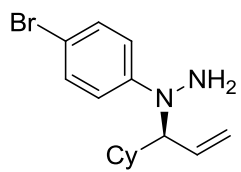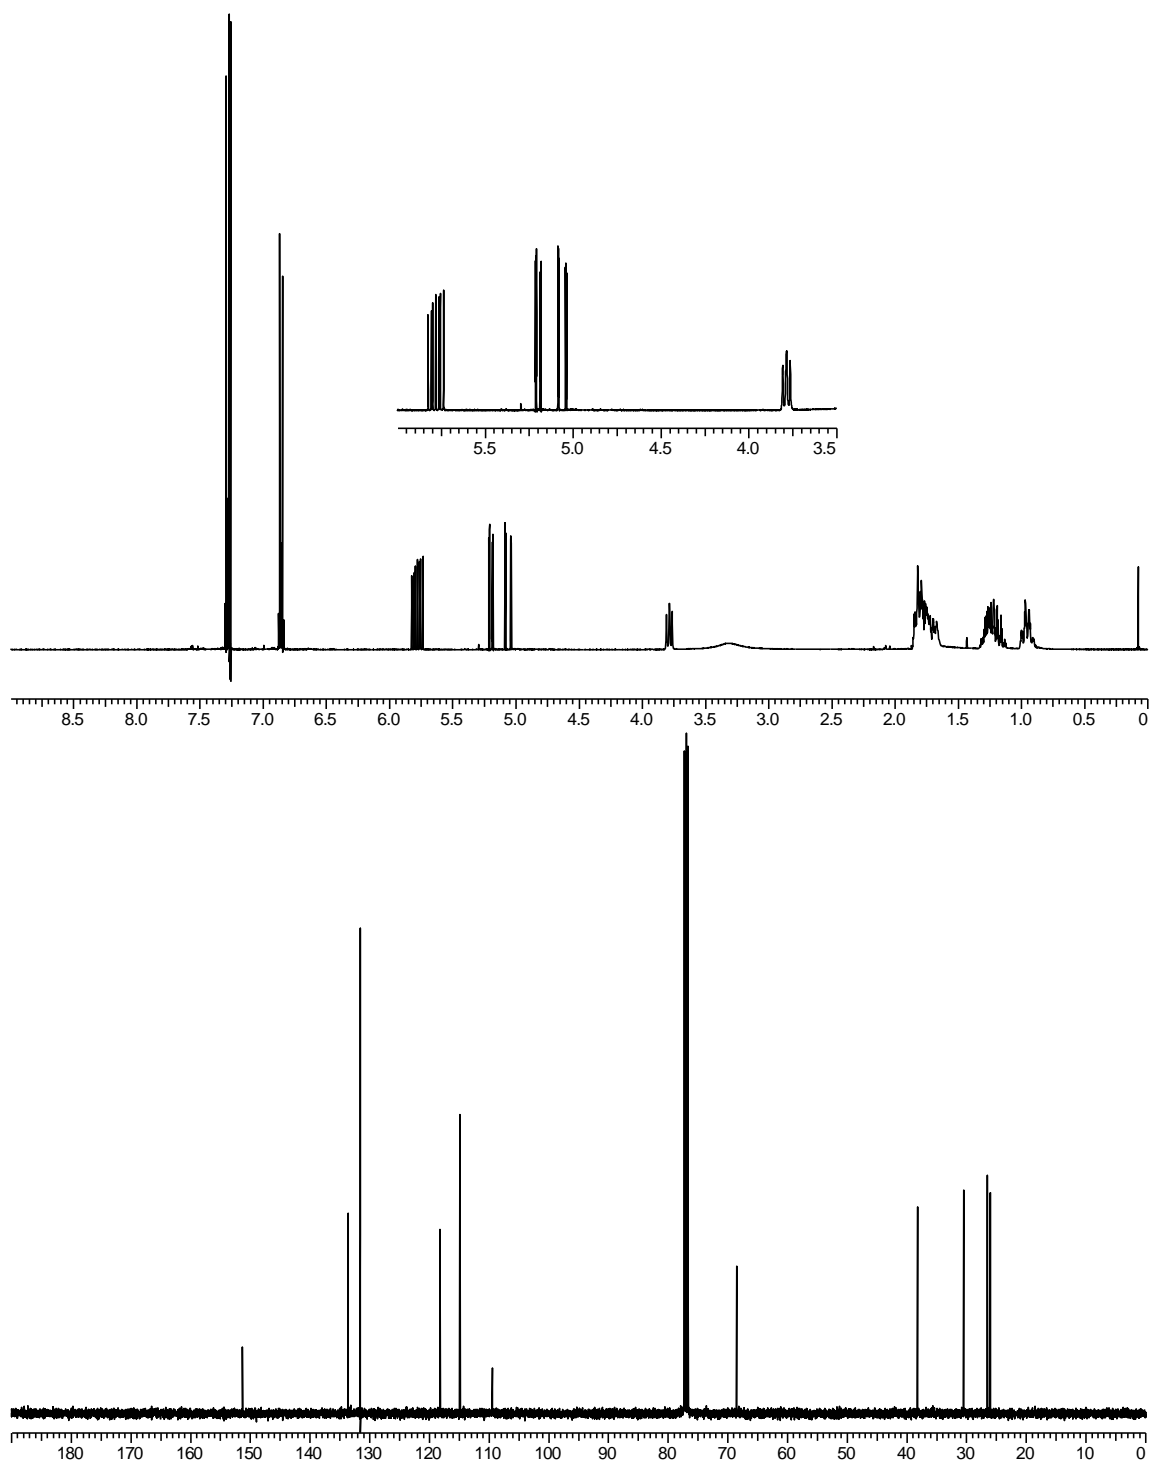

Supplementary figure 5.  $^1\text{H}$  and  $^{13}\text{C}$  NMR spectra for product 1e

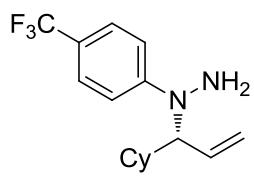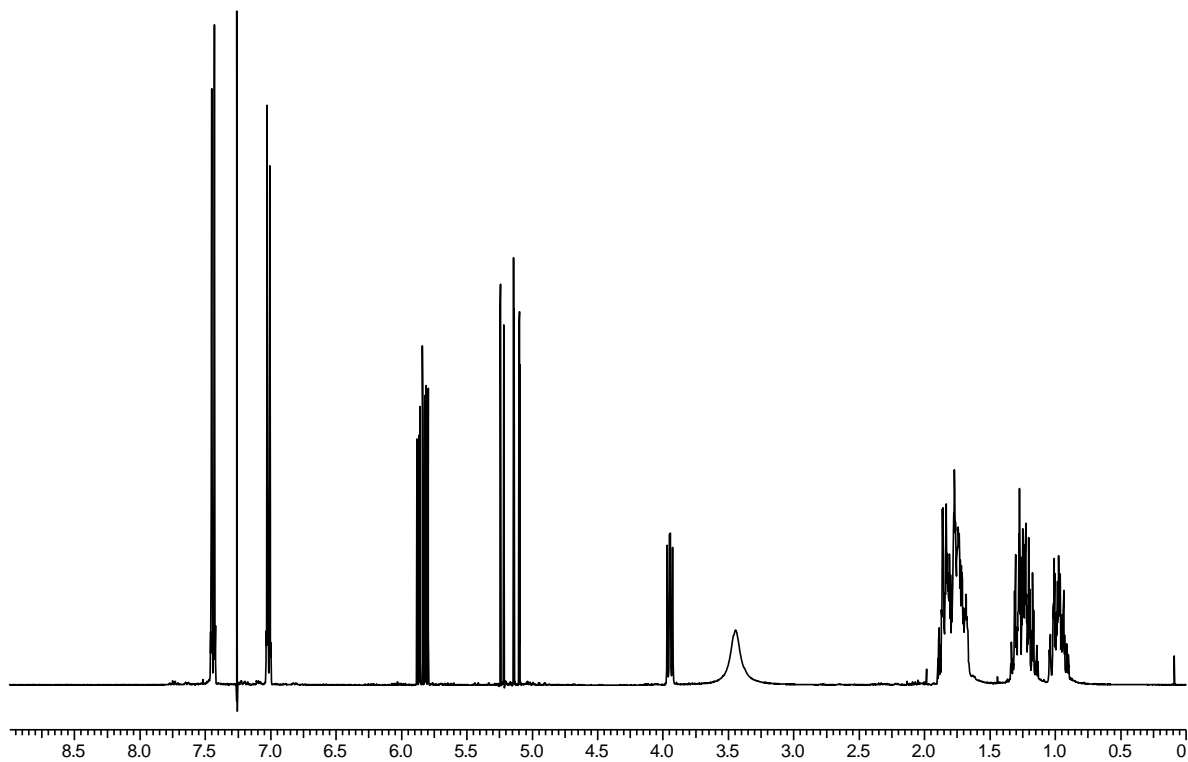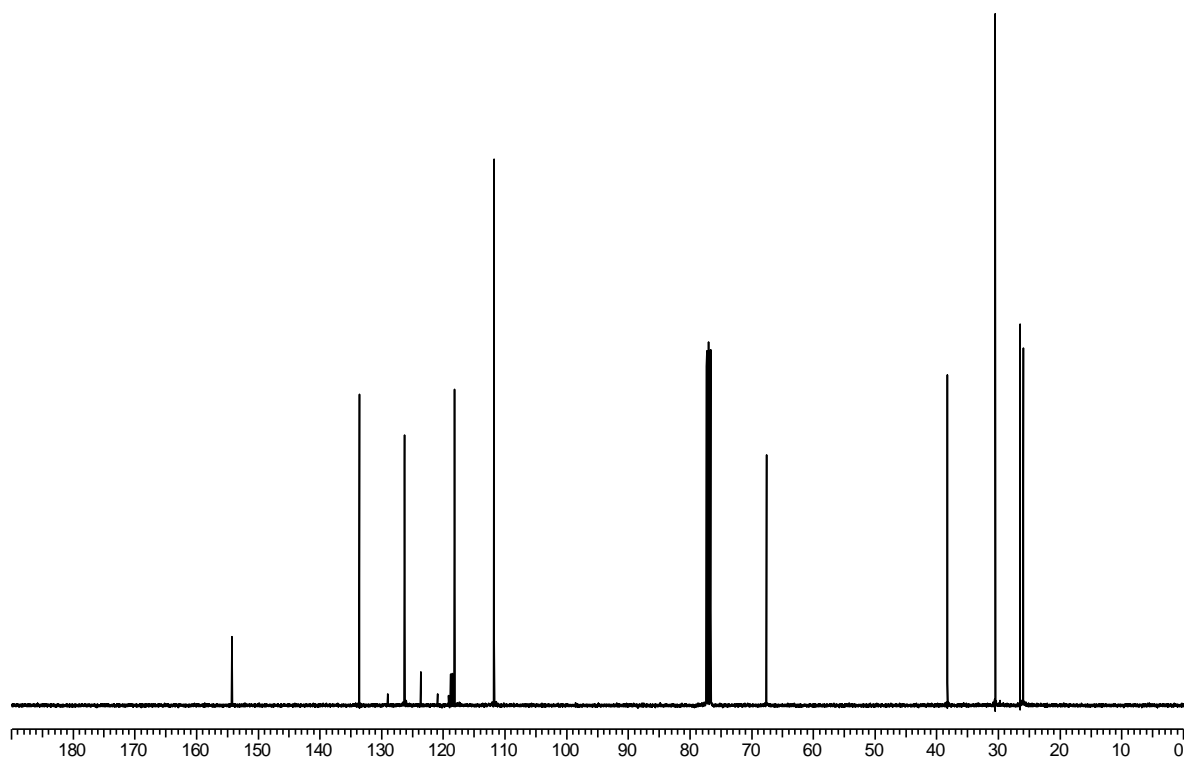

Supplementary figure 6. <sup>1</sup>H and <sup>13</sup>C NMR spectra for product 1f

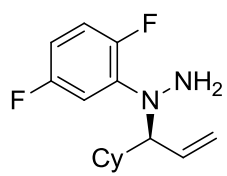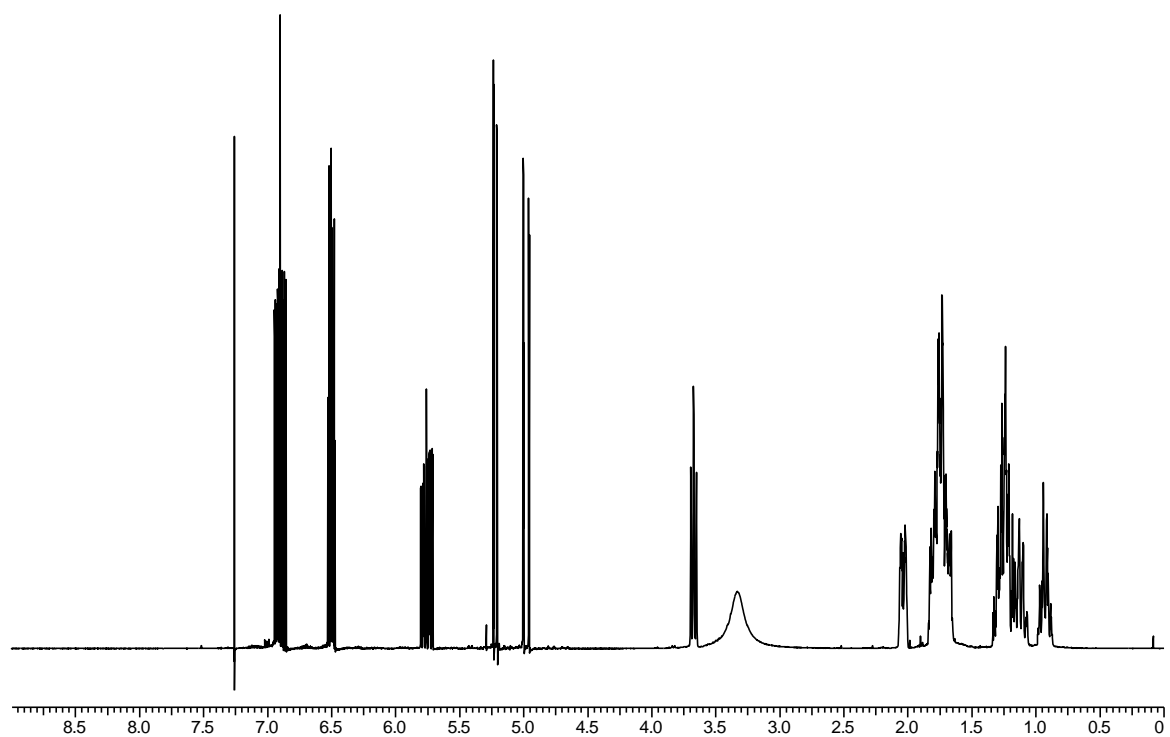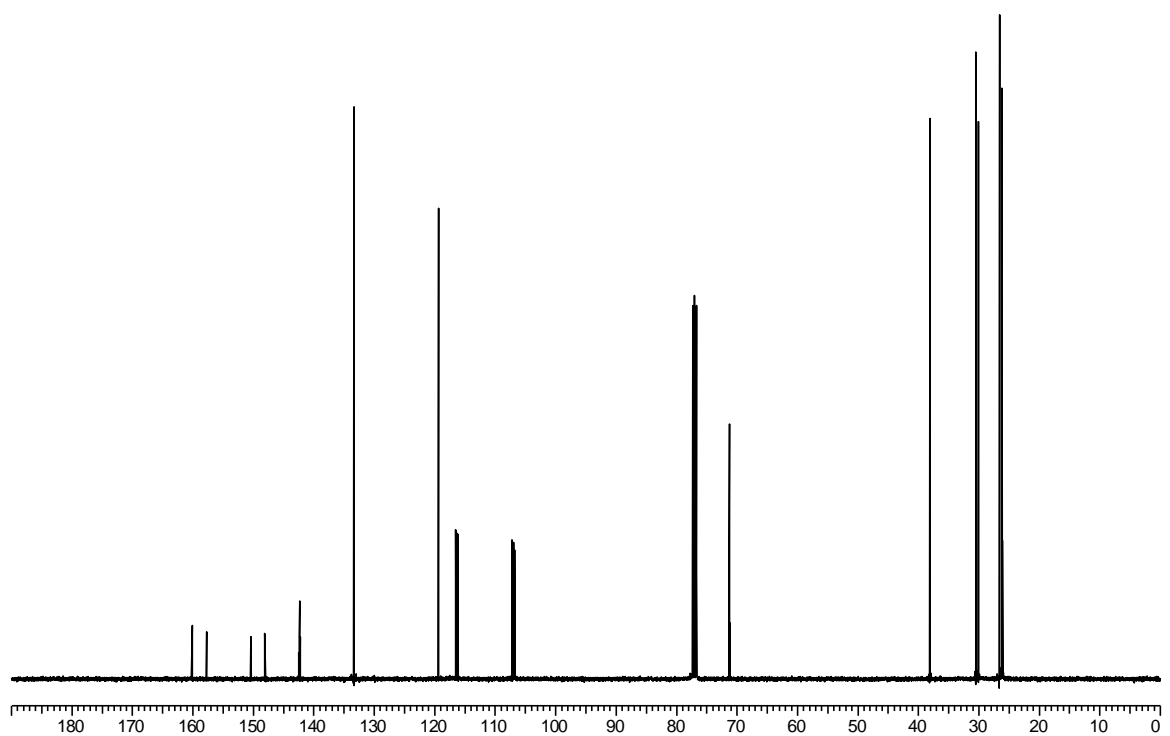

Supplementary figure 7. <sup>1</sup>H and <sup>13</sup>C NMR spectra for product **1g**

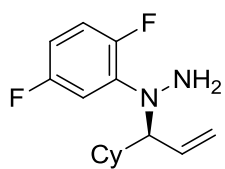

<sup>19</sup>F NMR

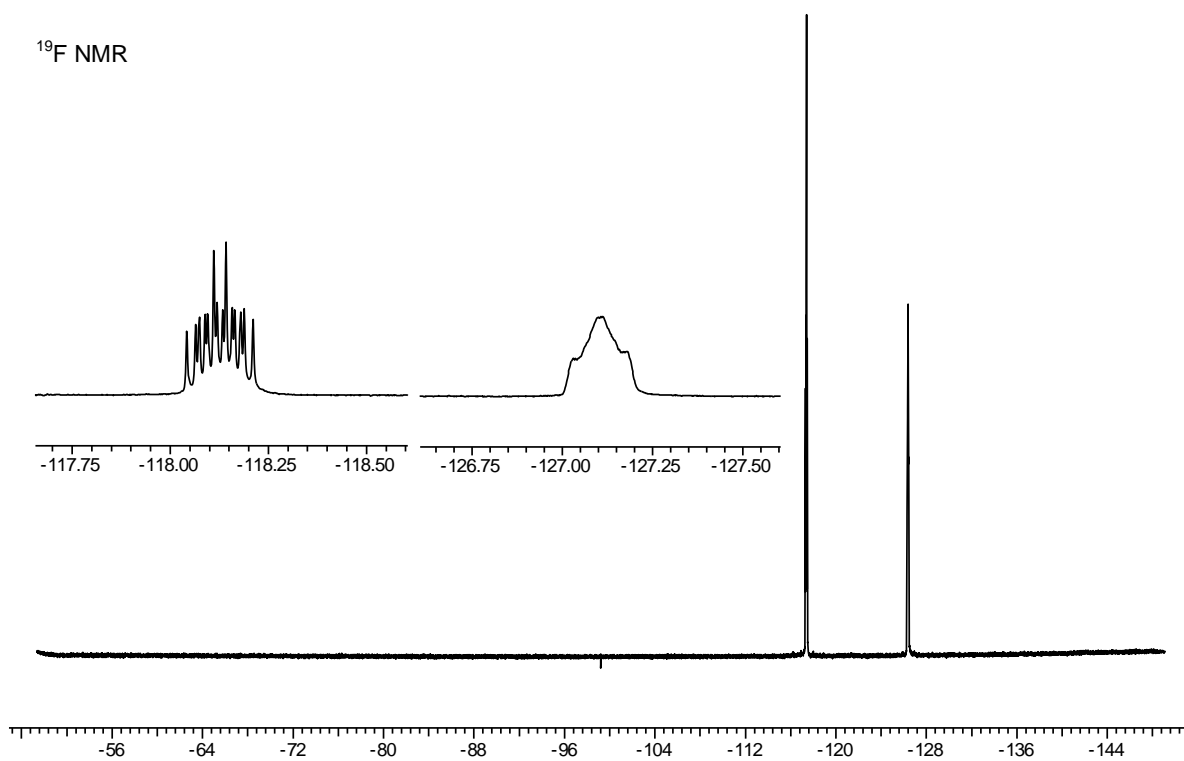

<sup>19</sup>F NMR (<sup>1</sup>H Decoupled)

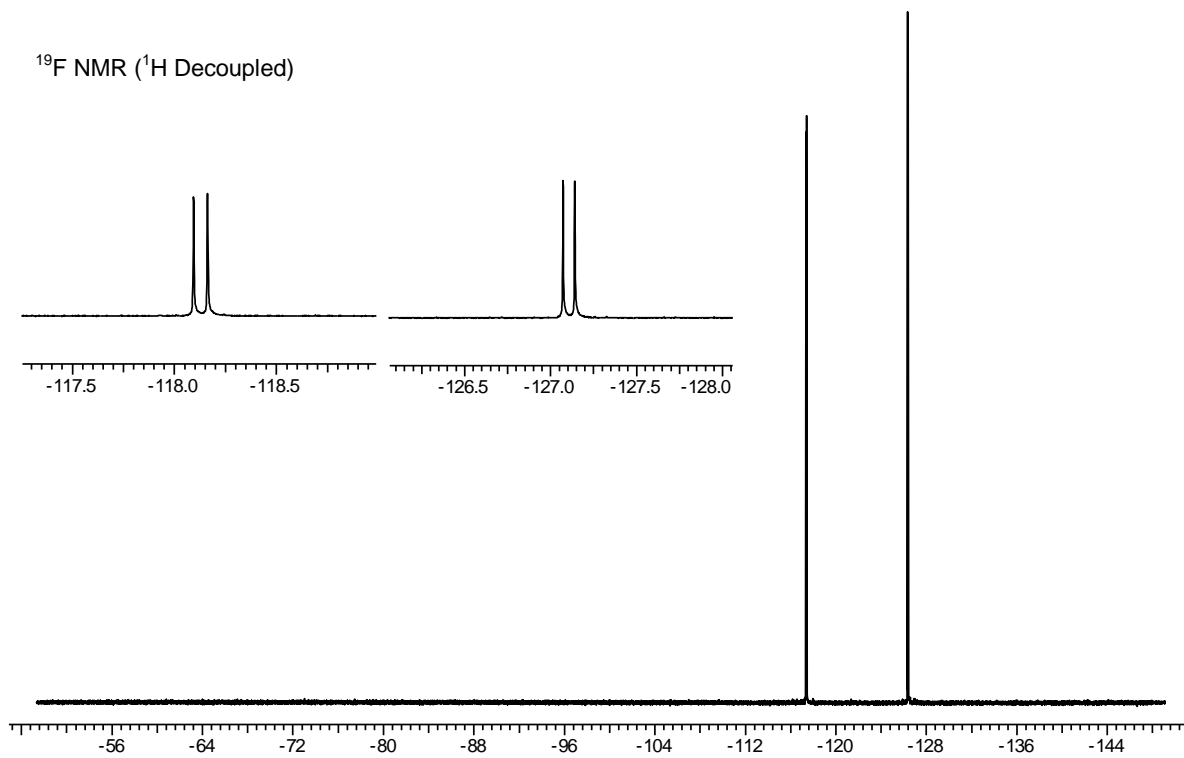

Supplementary figure 8. <sup>19</sup>F NMR spectra for product 1g



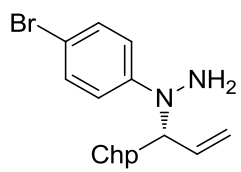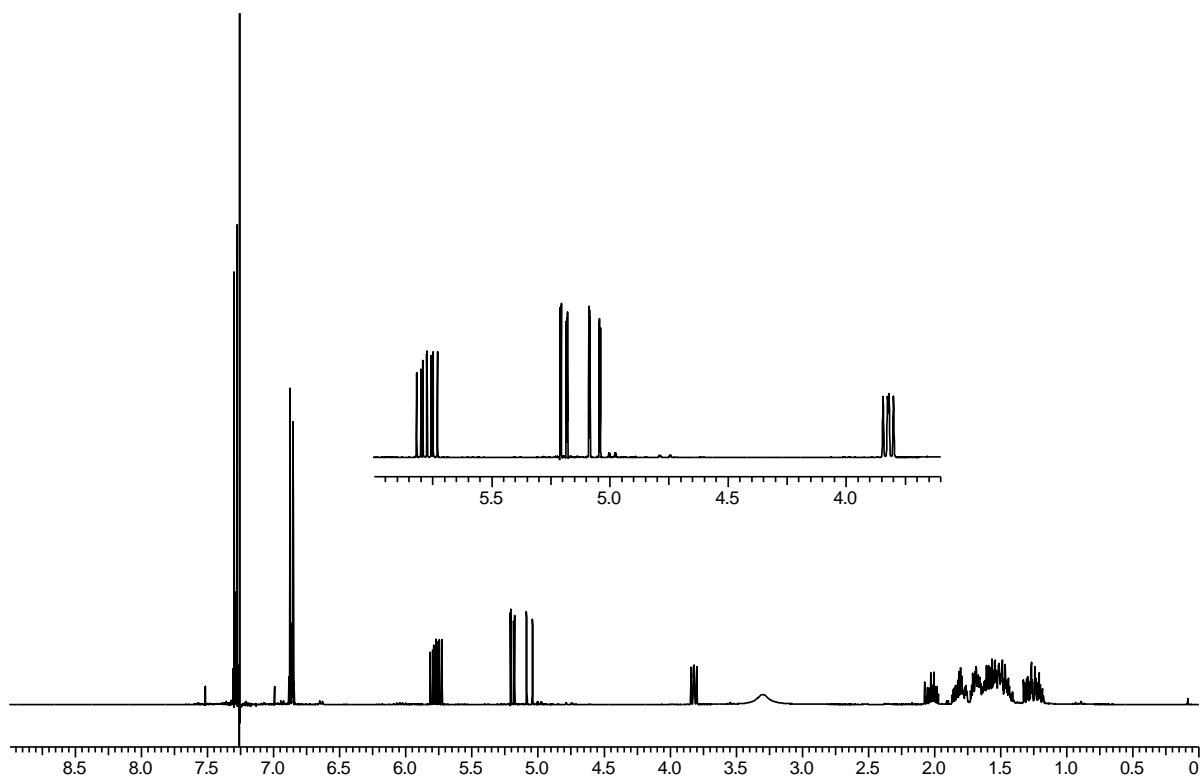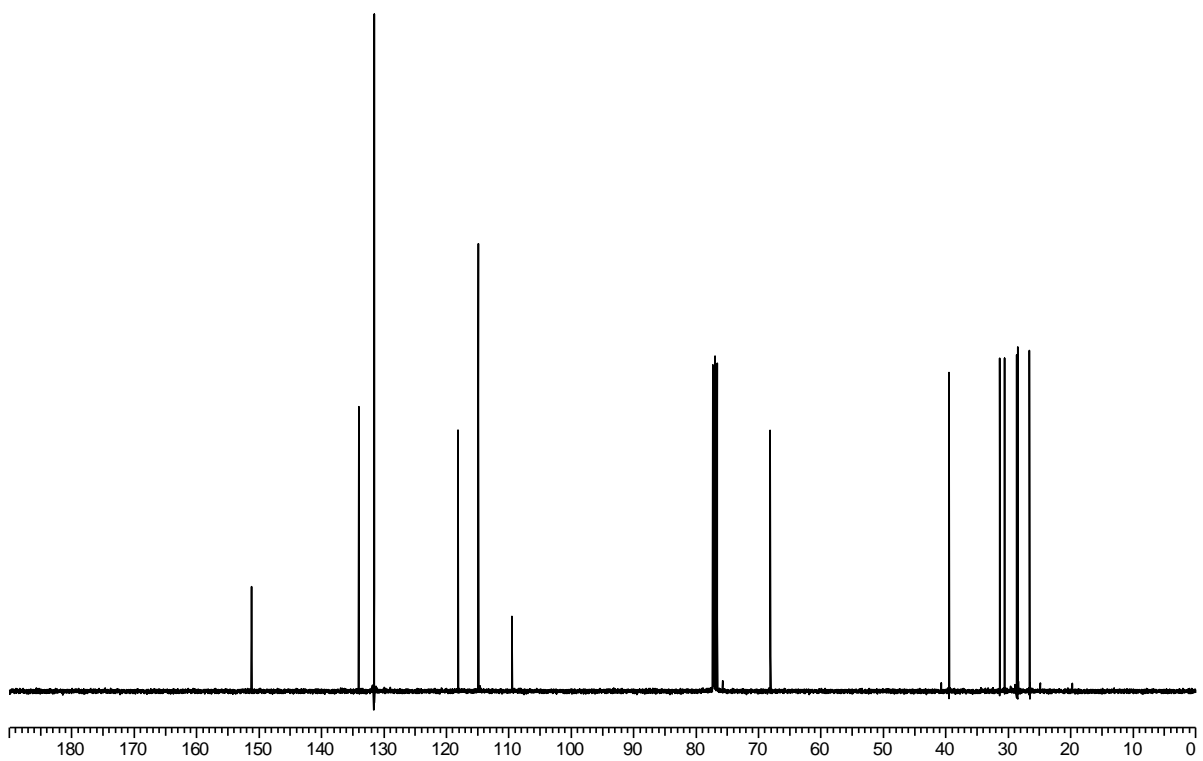

Supplementary figure 9.  $^1\text{H}$  and  $^{13}\text{C}$  NMR spectra for product **1h**

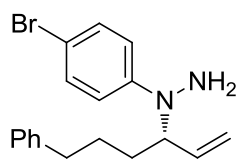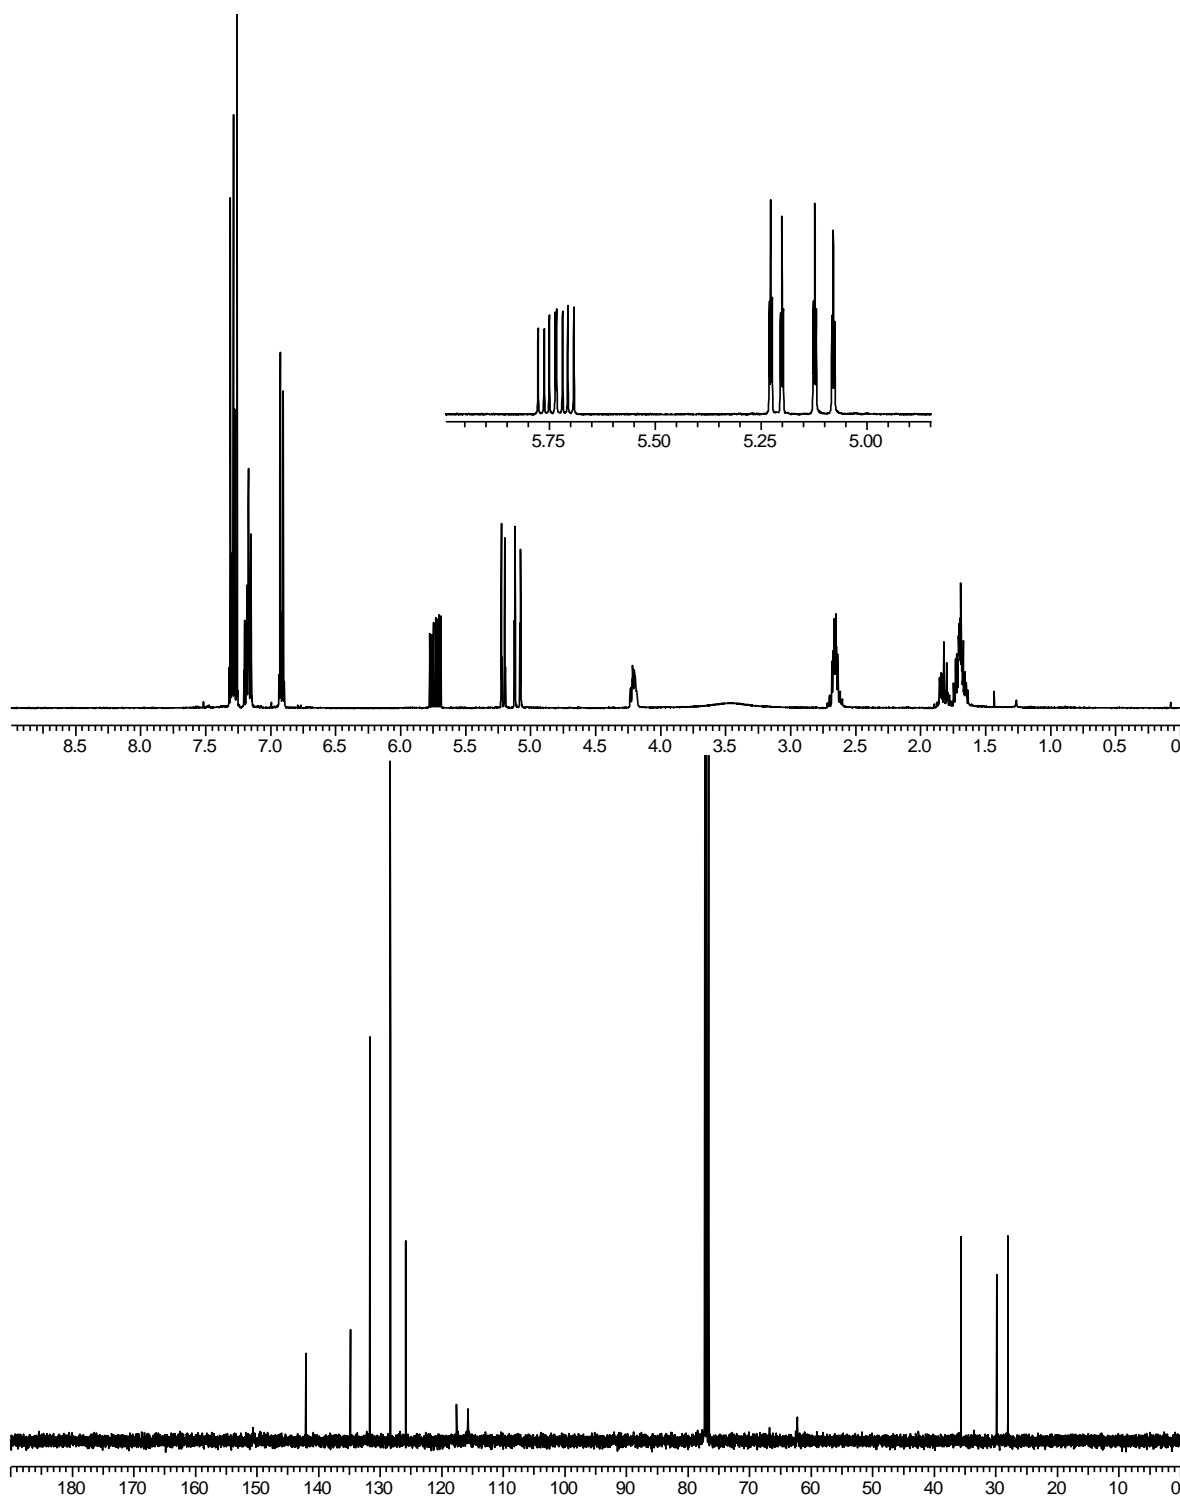

Supplementary figure 10.  $^1\text{H}$  and  $^{13}\text{C}$  NMR spectra for product **1i**

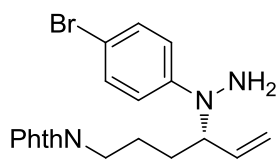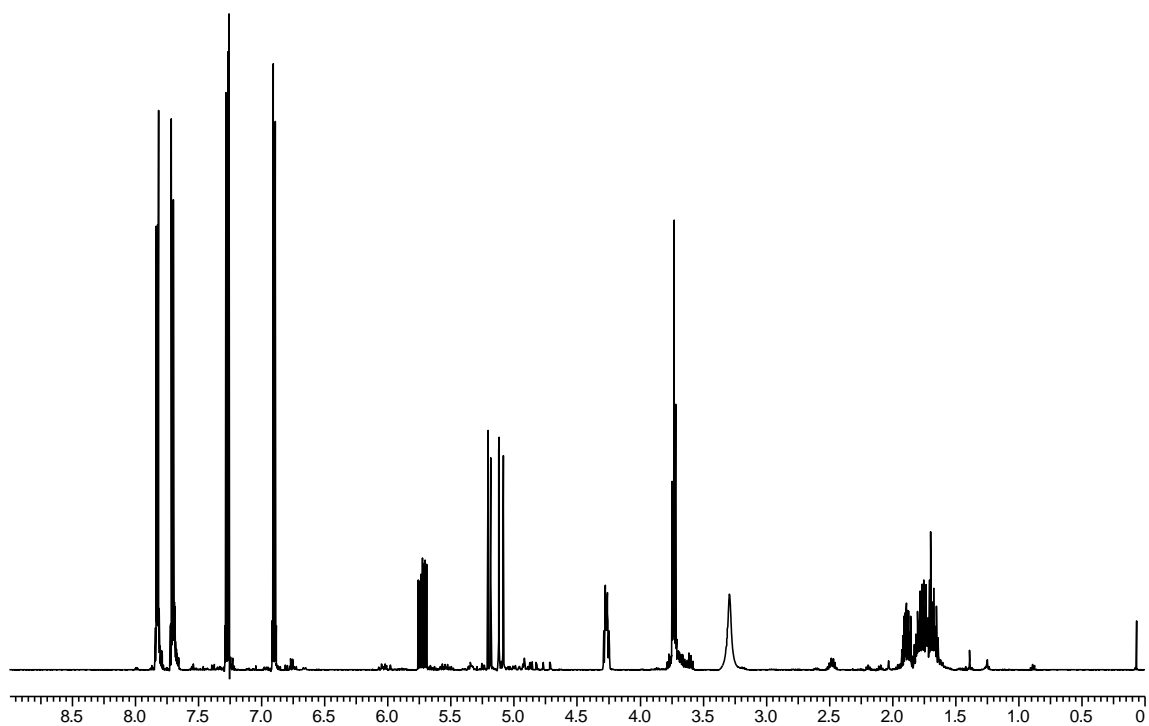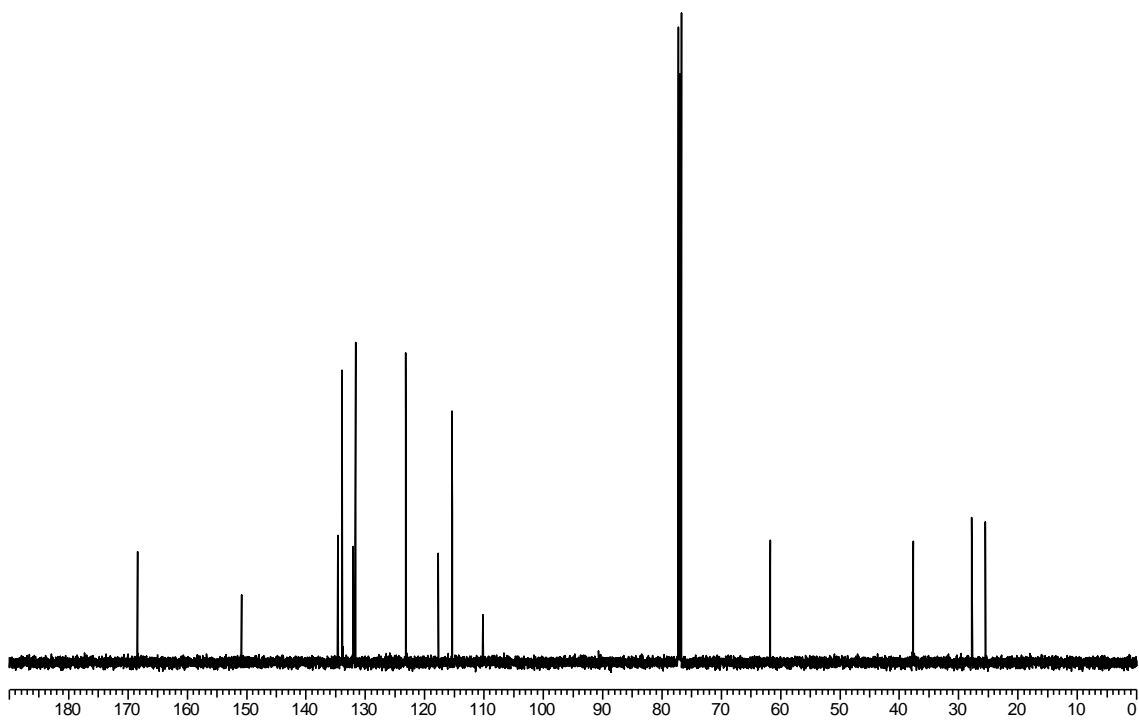

Supplementary figure 11.  $^1\text{H}$  and  $^{13}\text{C}$  NMR spectra for product 1j

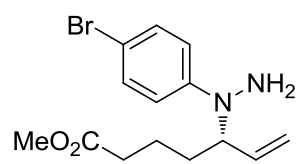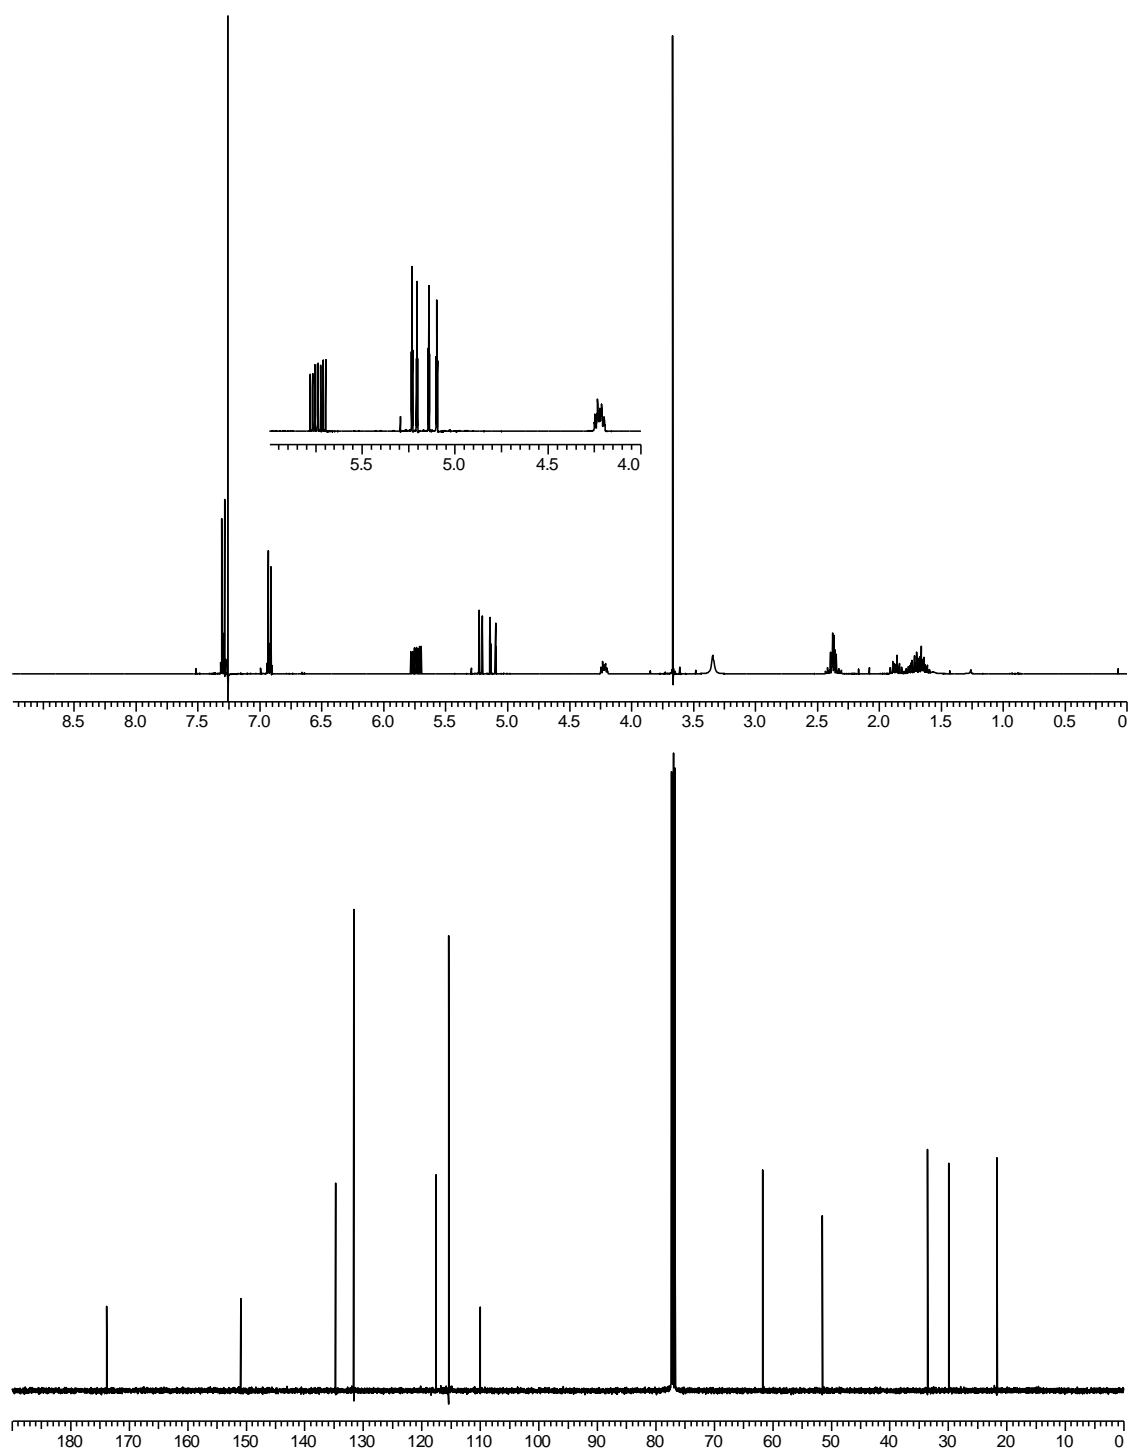

Supplementary figure 12.  $^1\text{H}$  and  $^{13}\text{C}$  NMR spectra for product **1k**

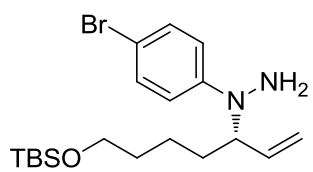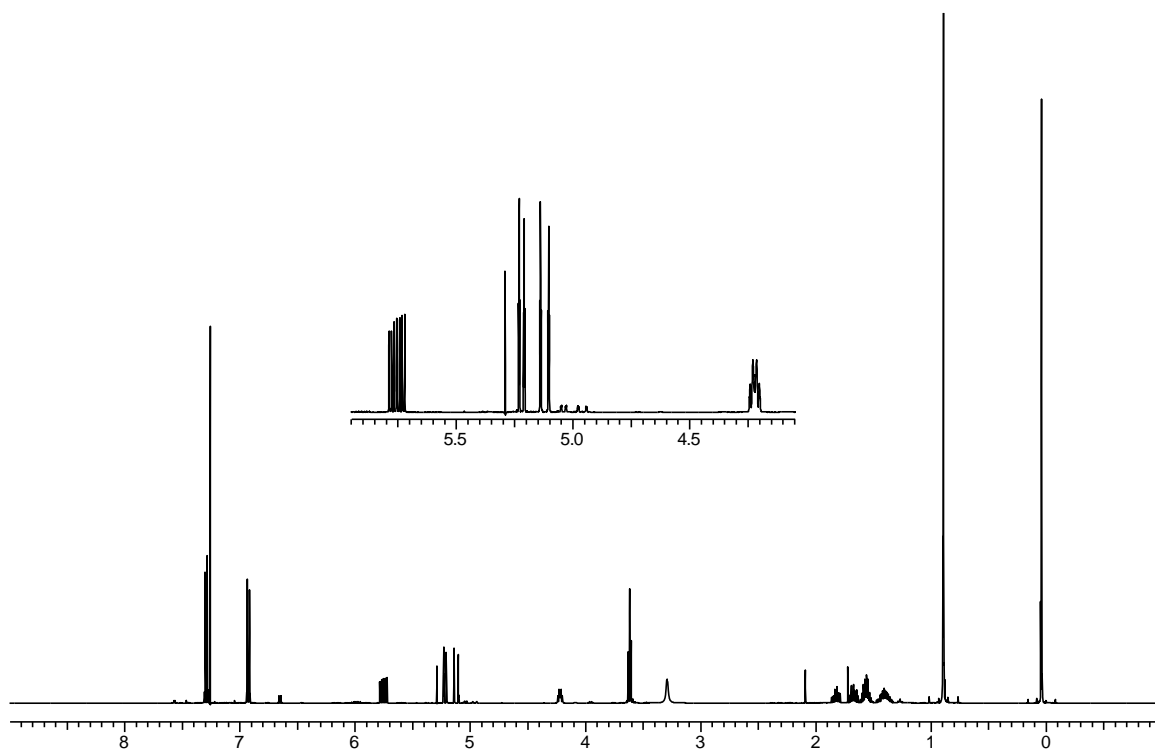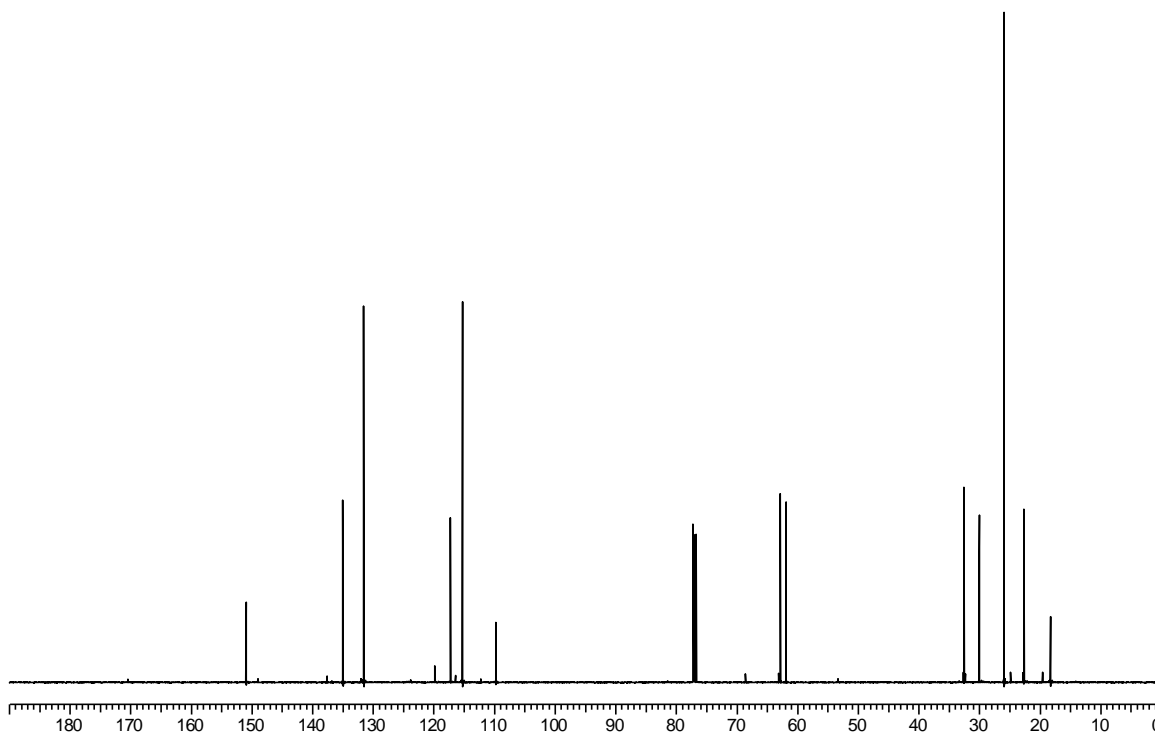

Supplementary figure 13.  $^1\text{H}$  and  $^{13}\text{C}$  NMR spectra for product **11**

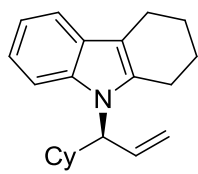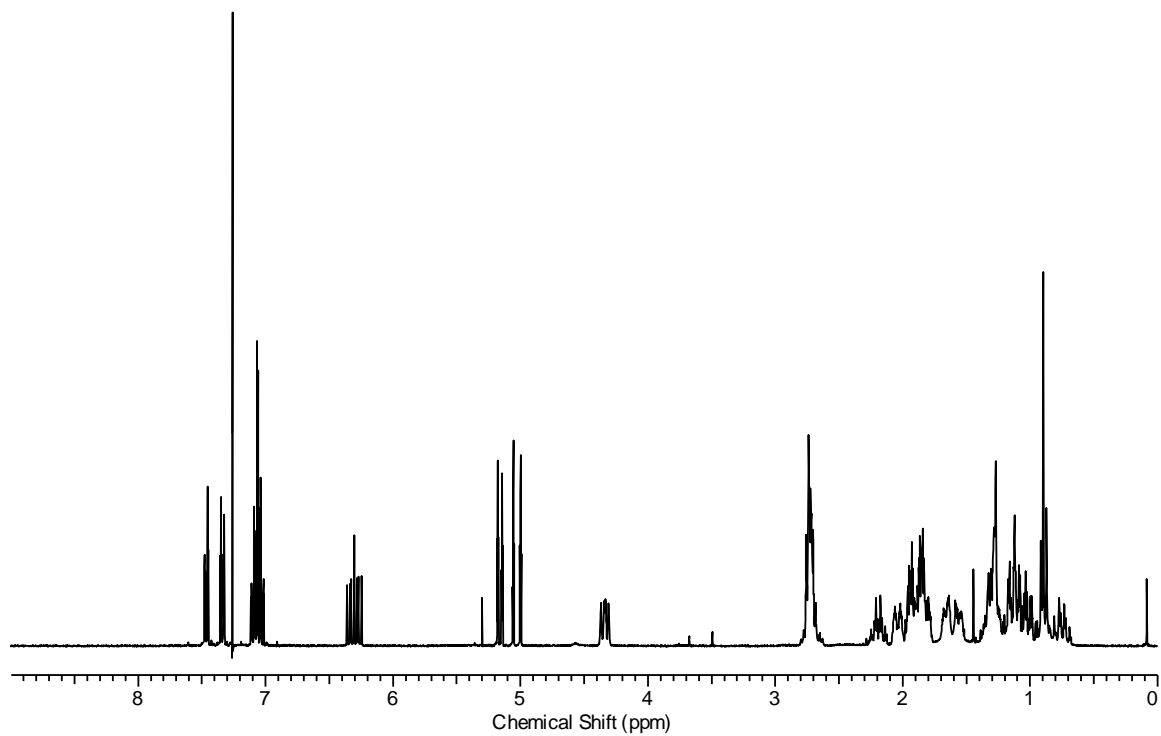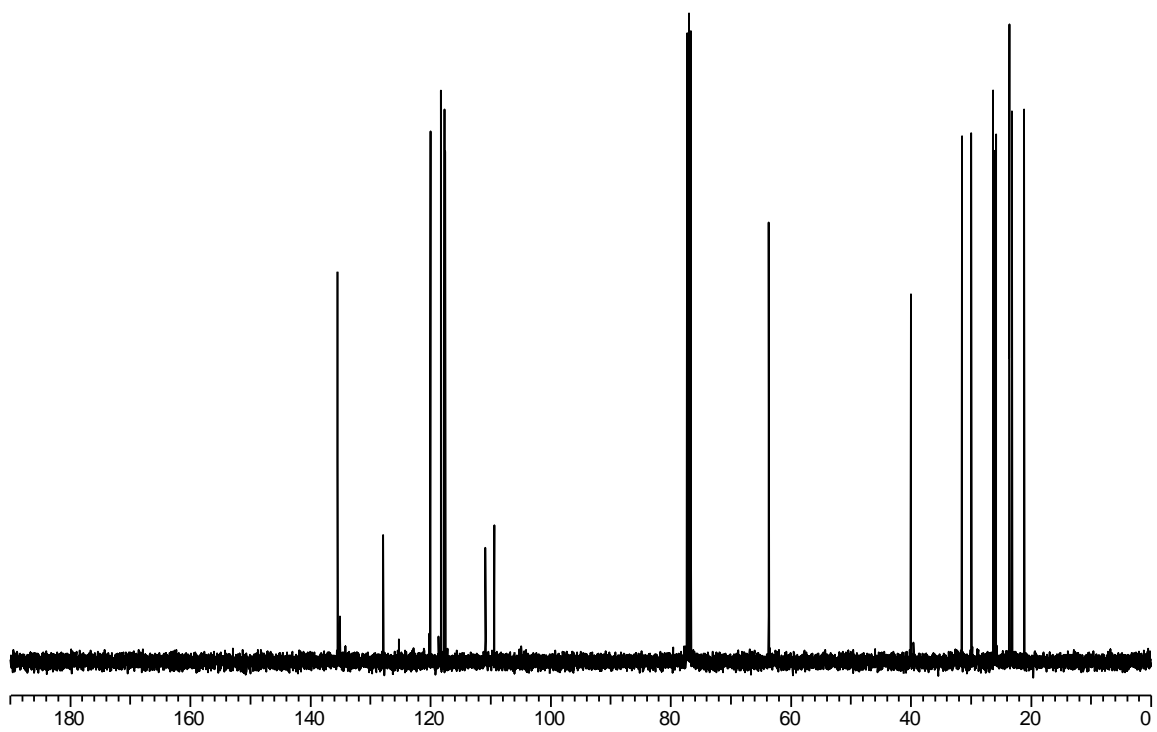

Supplementary figure 14.  $^1\text{H}$  and  $^{13}\text{C}$  NMR spectra for product 2a

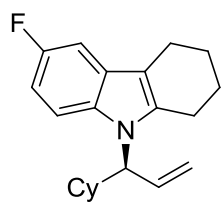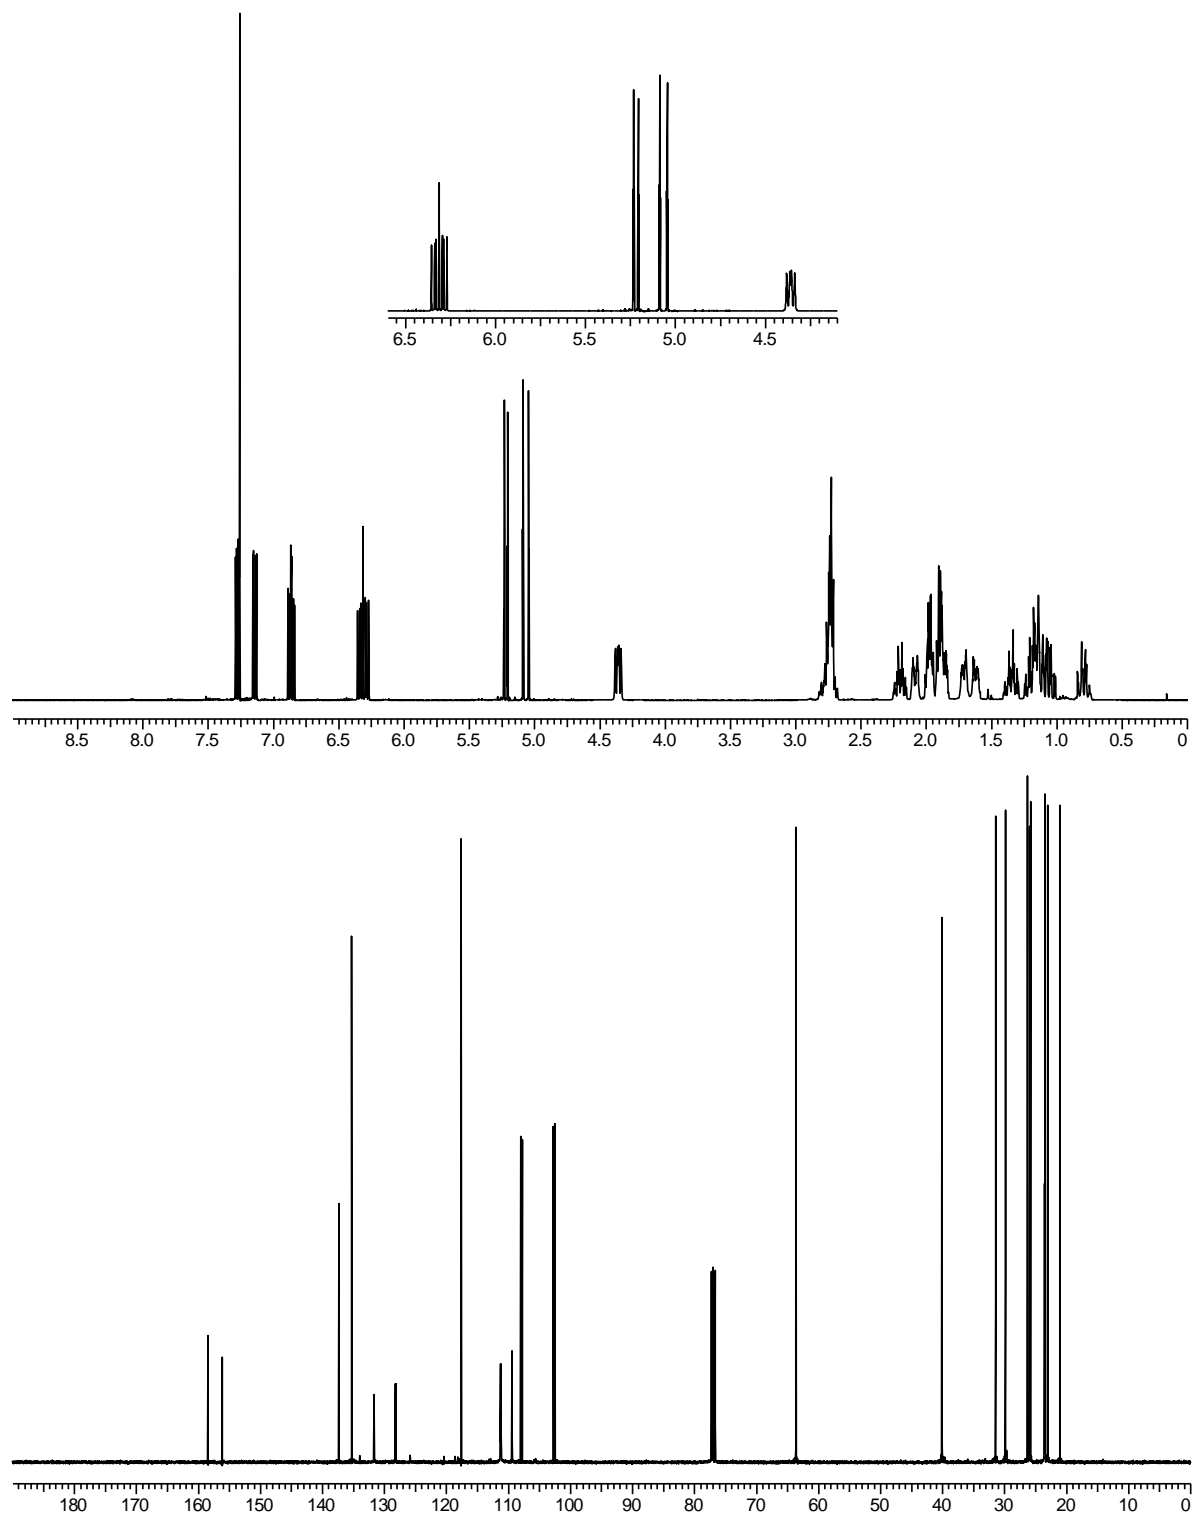

Supplementary figure 15.  $^1\text{H}$  and  $^{13}\text{C}$  NMR spectra for product **2b**

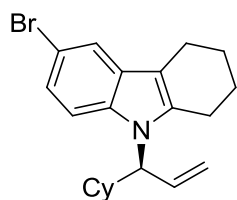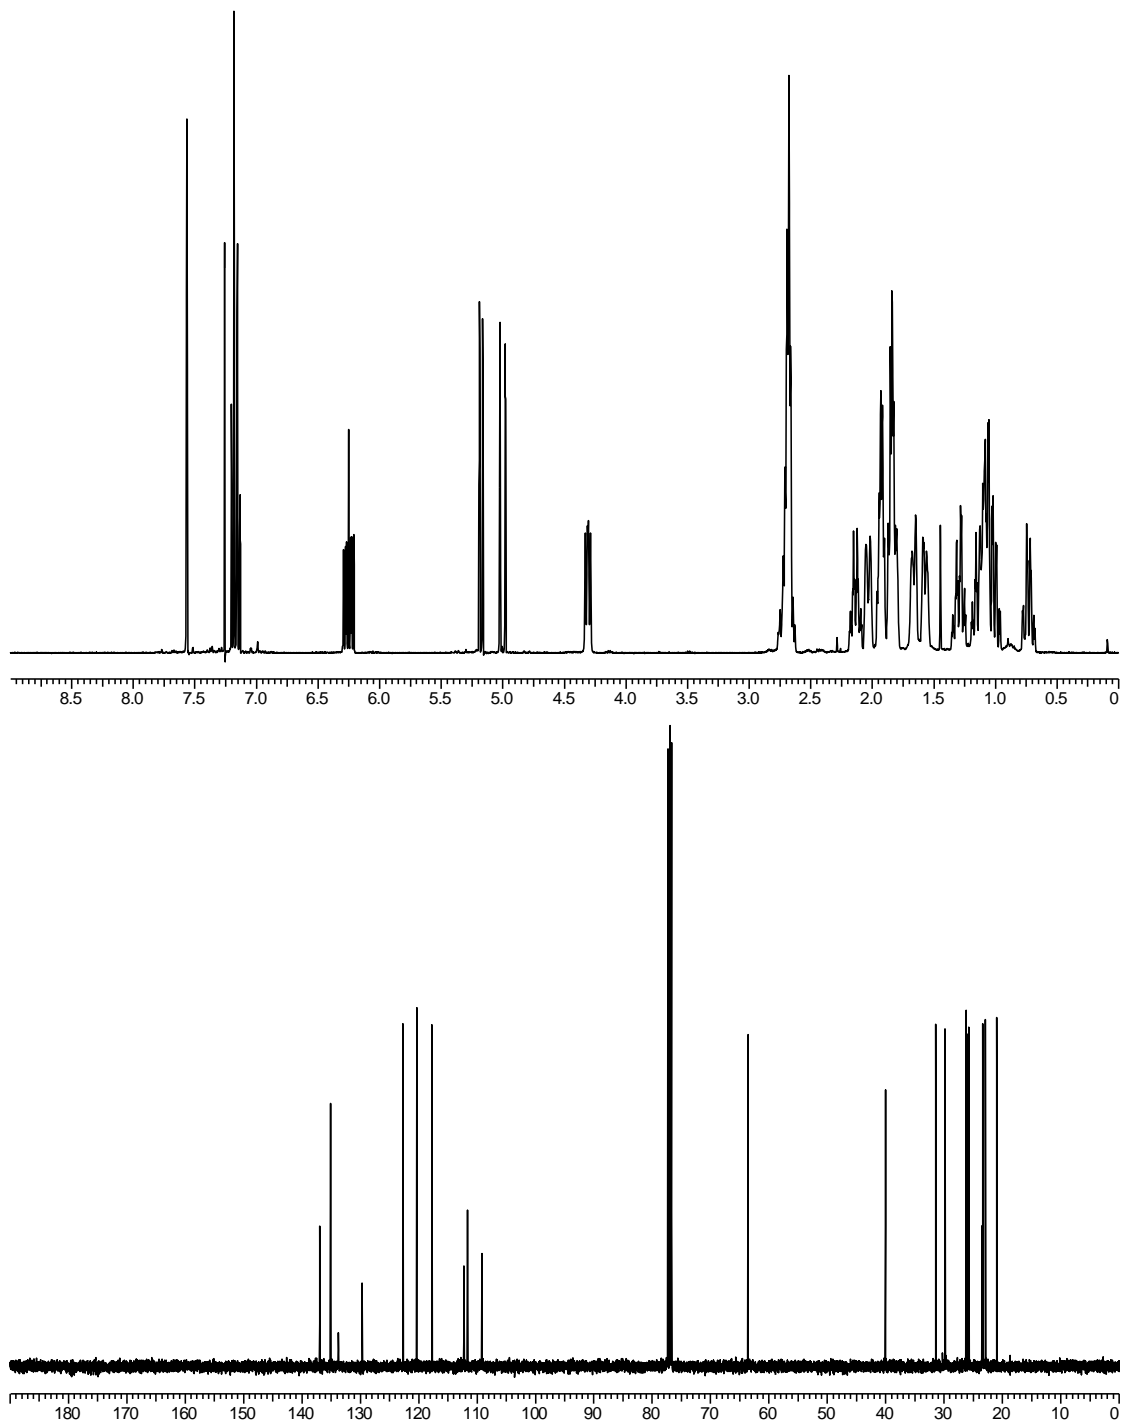

Supplementary figure 16.  $^1\text{H}$  and  $^{13}\text{C}$  NMR spectra for product 2c



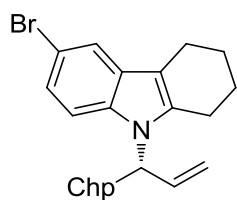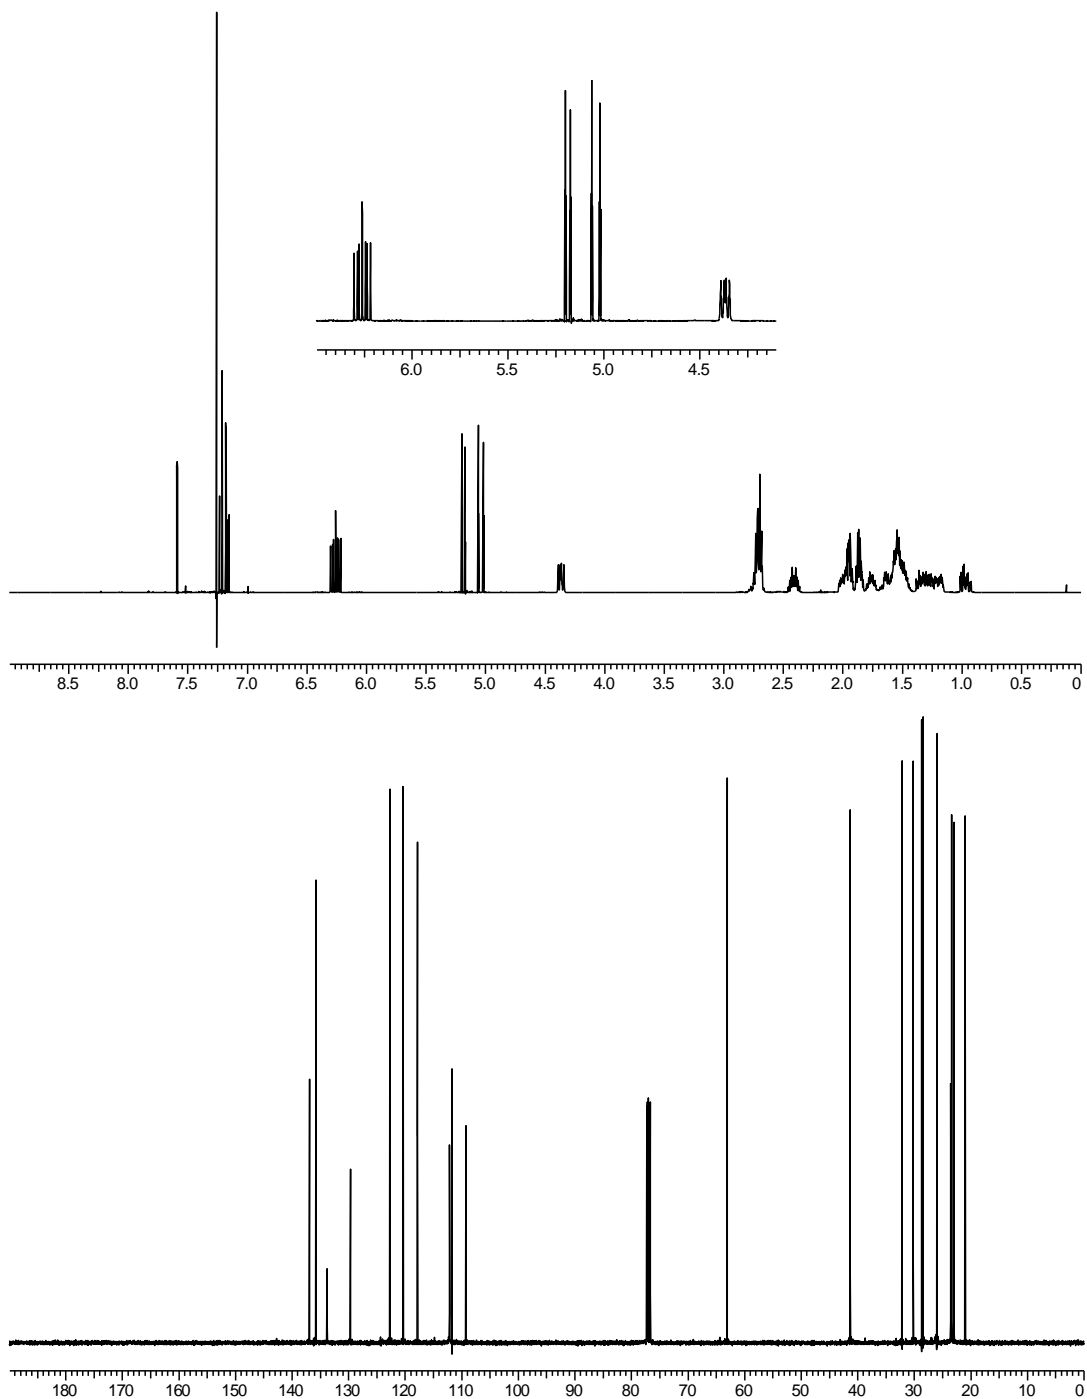

Supplementary figure 16.  $^1\text{H}$  and  $^{13}\text{C}$  NMR spectra for product **2d**

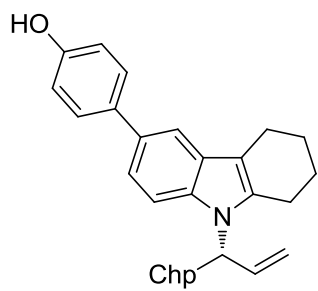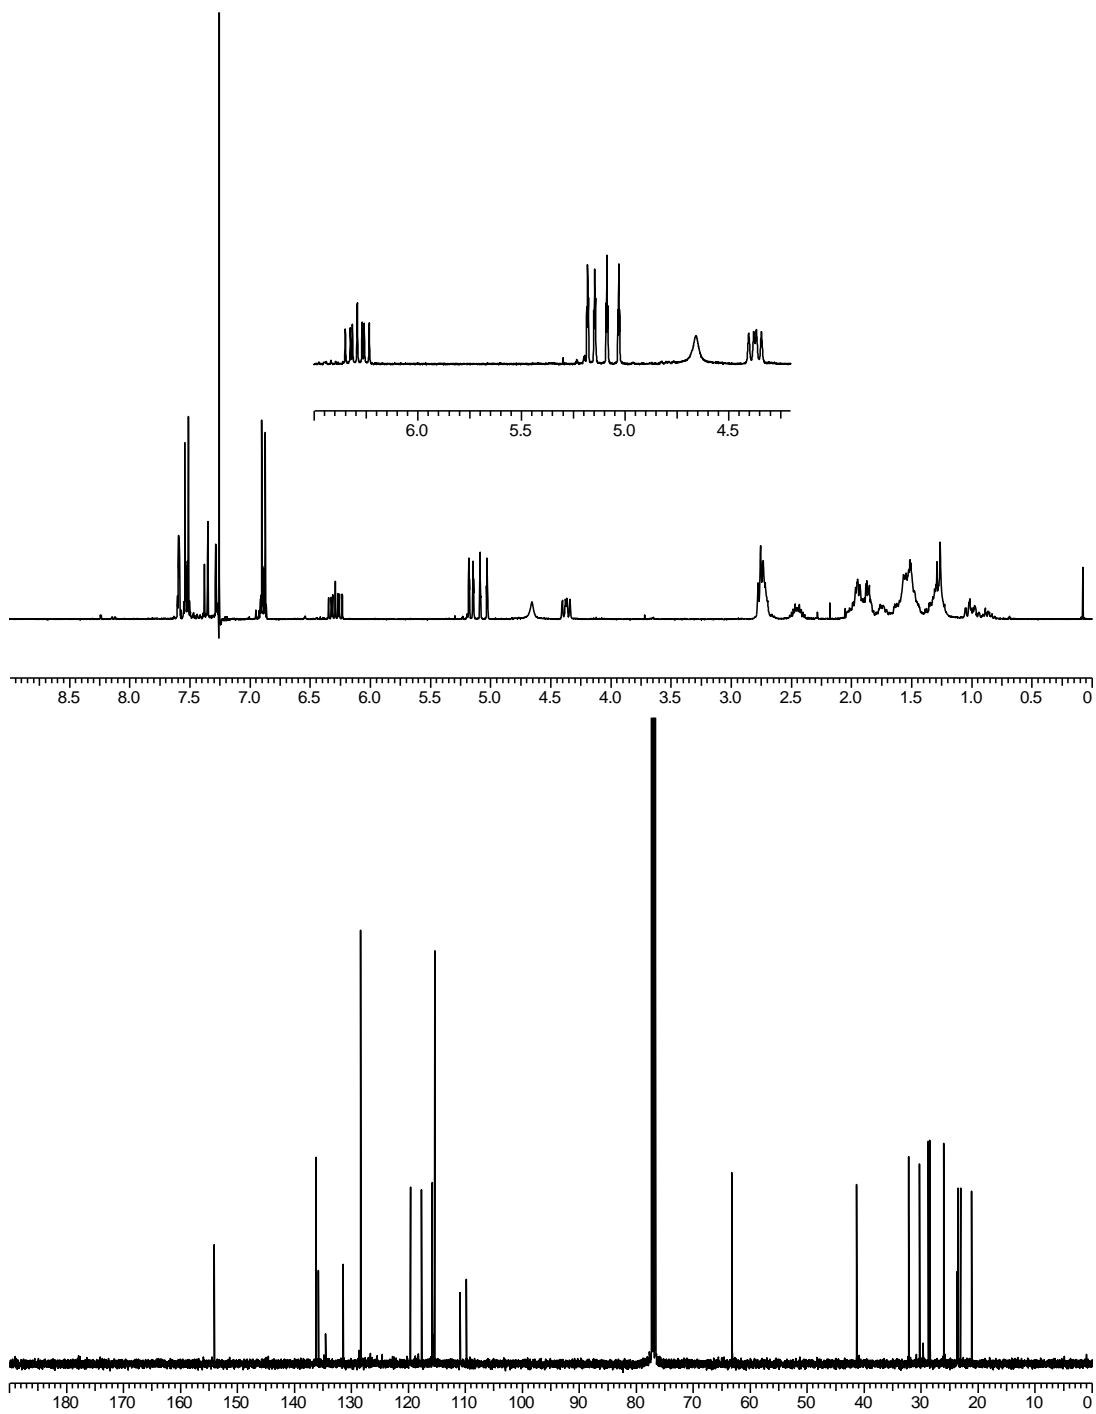

Supplementary figure 18.  $^1\text{H}$  and  $^{13}\text{C}$  NMR spectra for product **2dee**

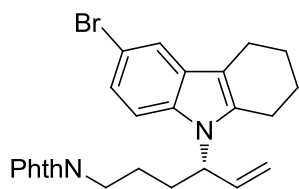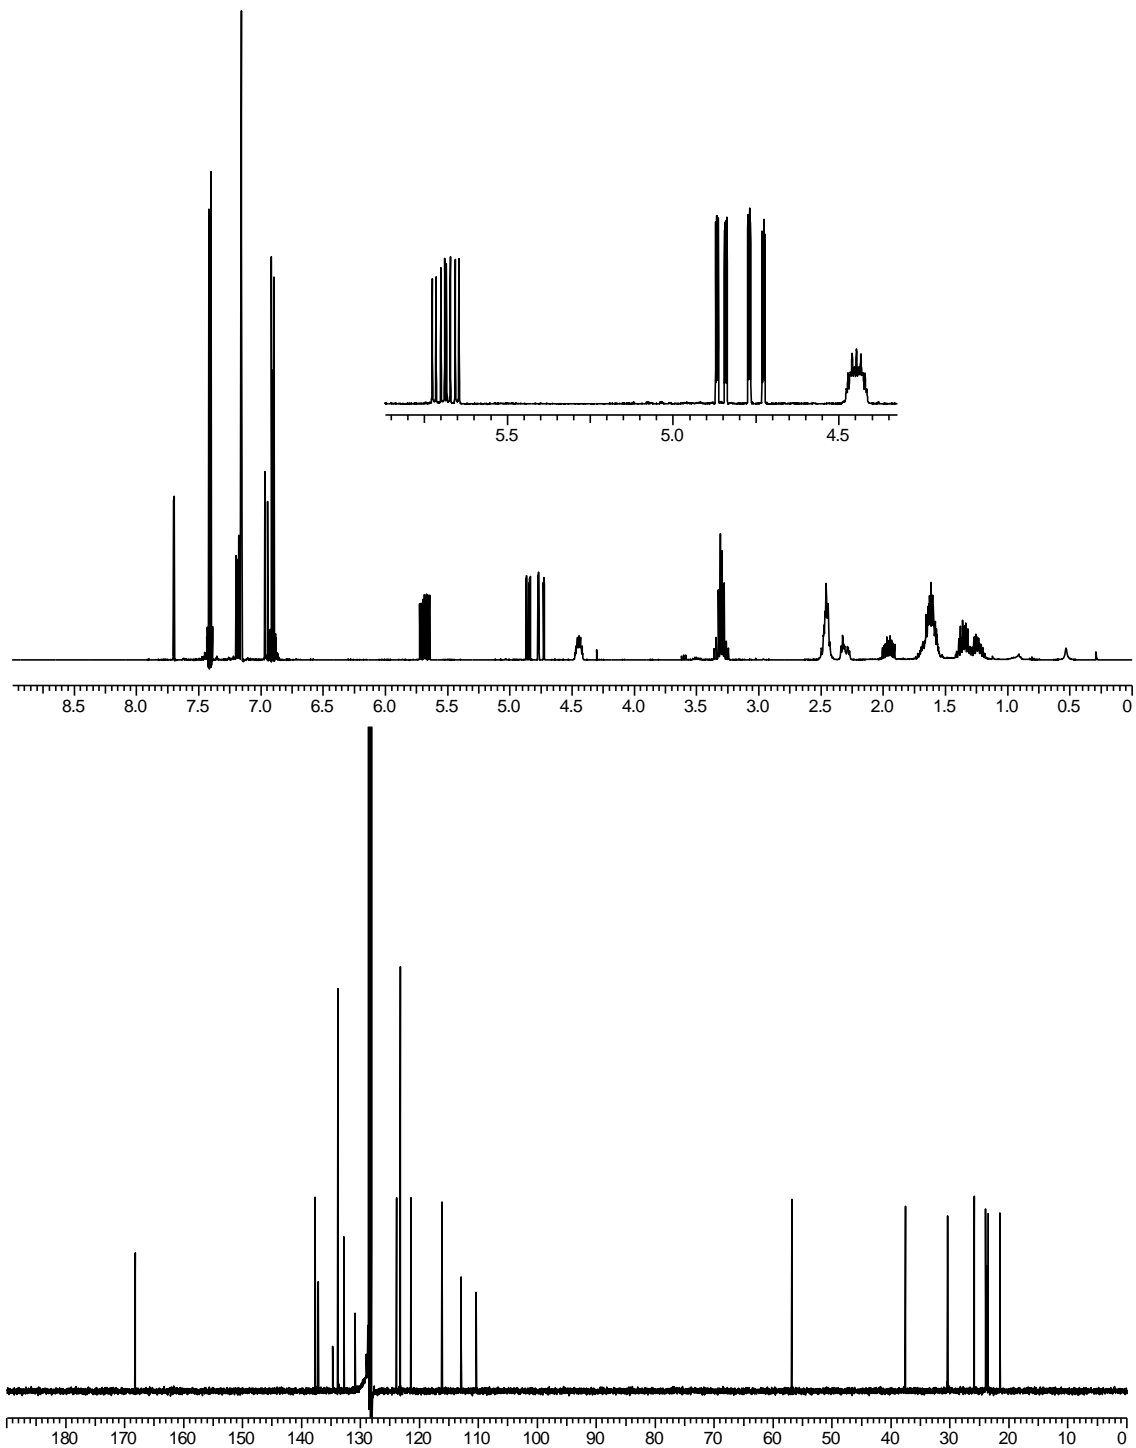

Supplementary figure 19.  $^1\text{H}$  and  $^{13}\text{C}$  NMR spectra for product 2e

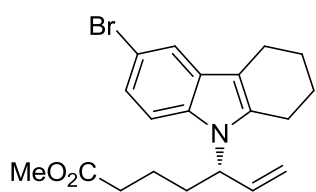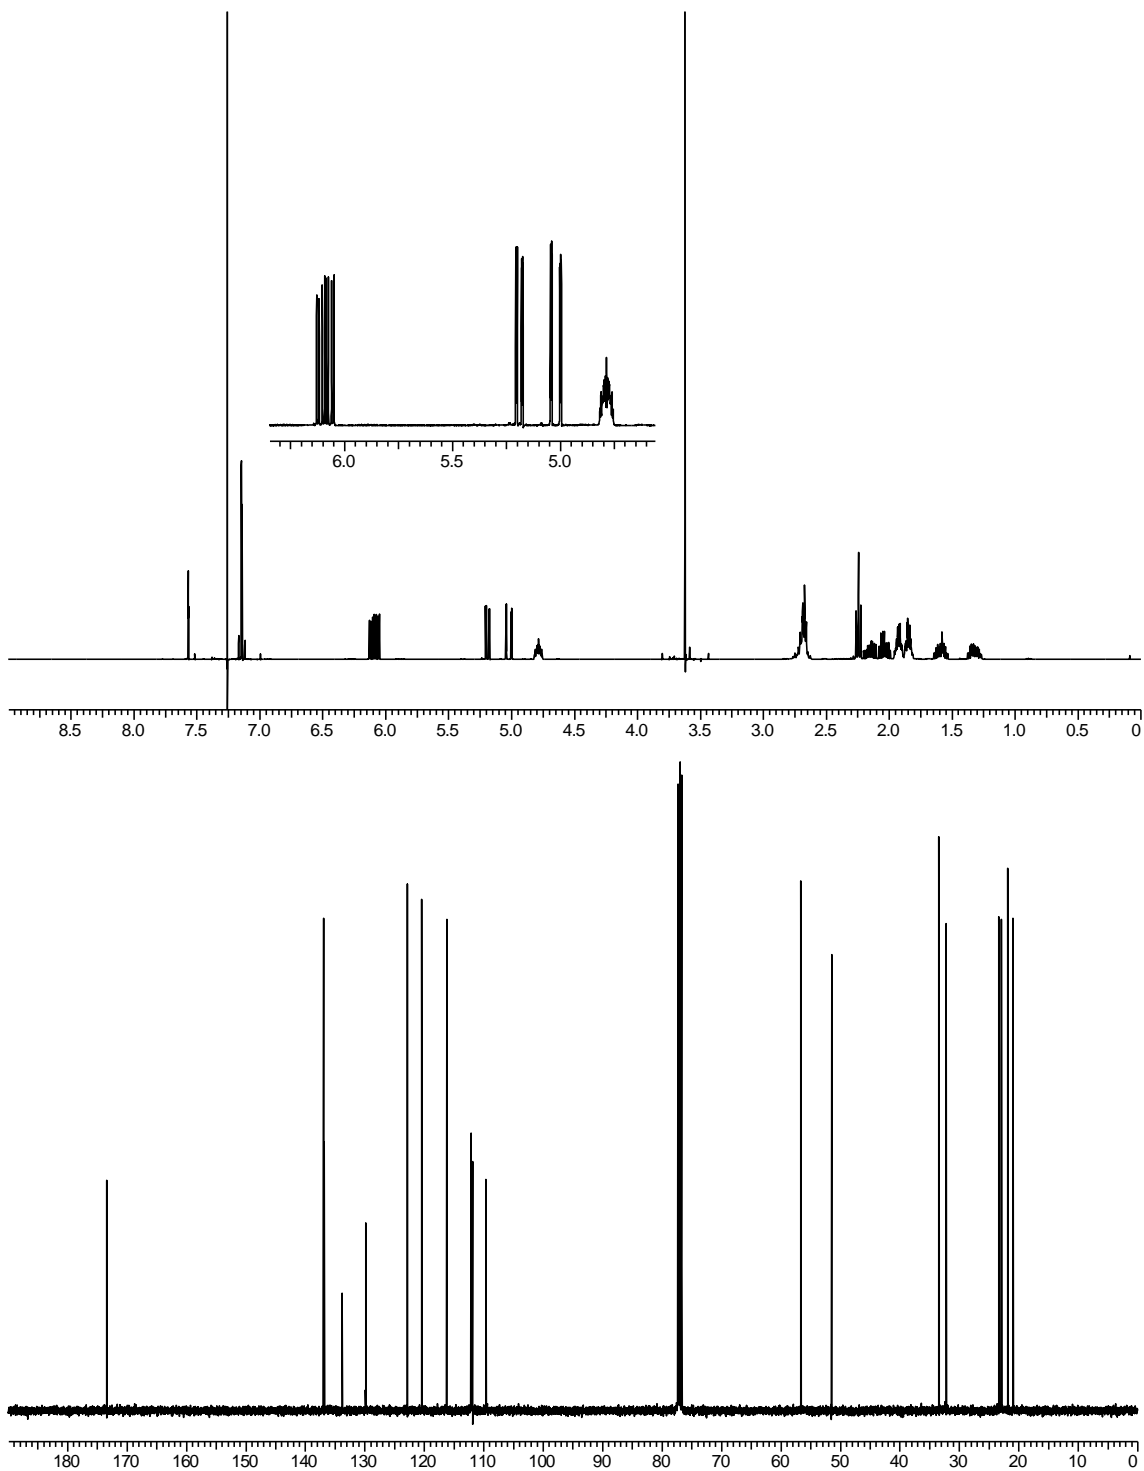

Supplementary figure 20.  $^1\text{H}$  and  $^{13}\text{C}$  NMR spectra for product 2f

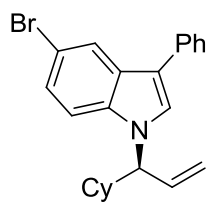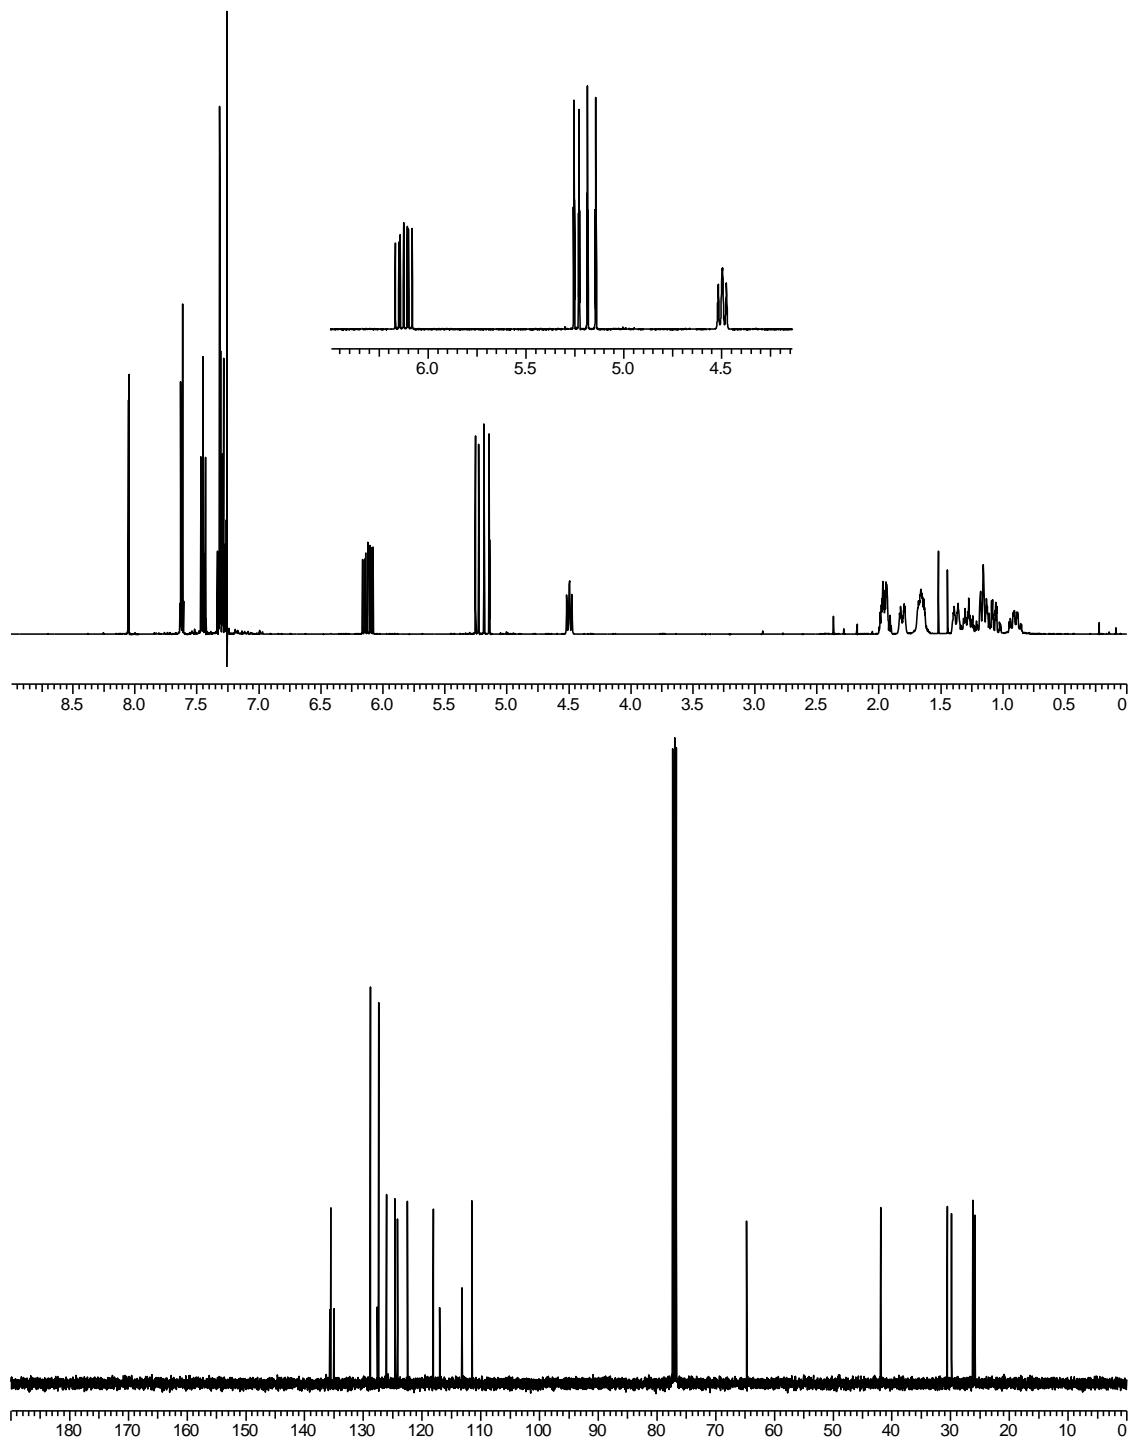

Supplementary figure 21.  $^1\text{H}$  and  $^{13}\text{C}$  NMR spectra for product **2g**

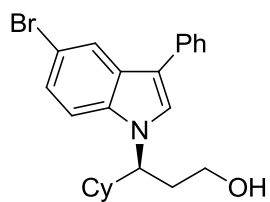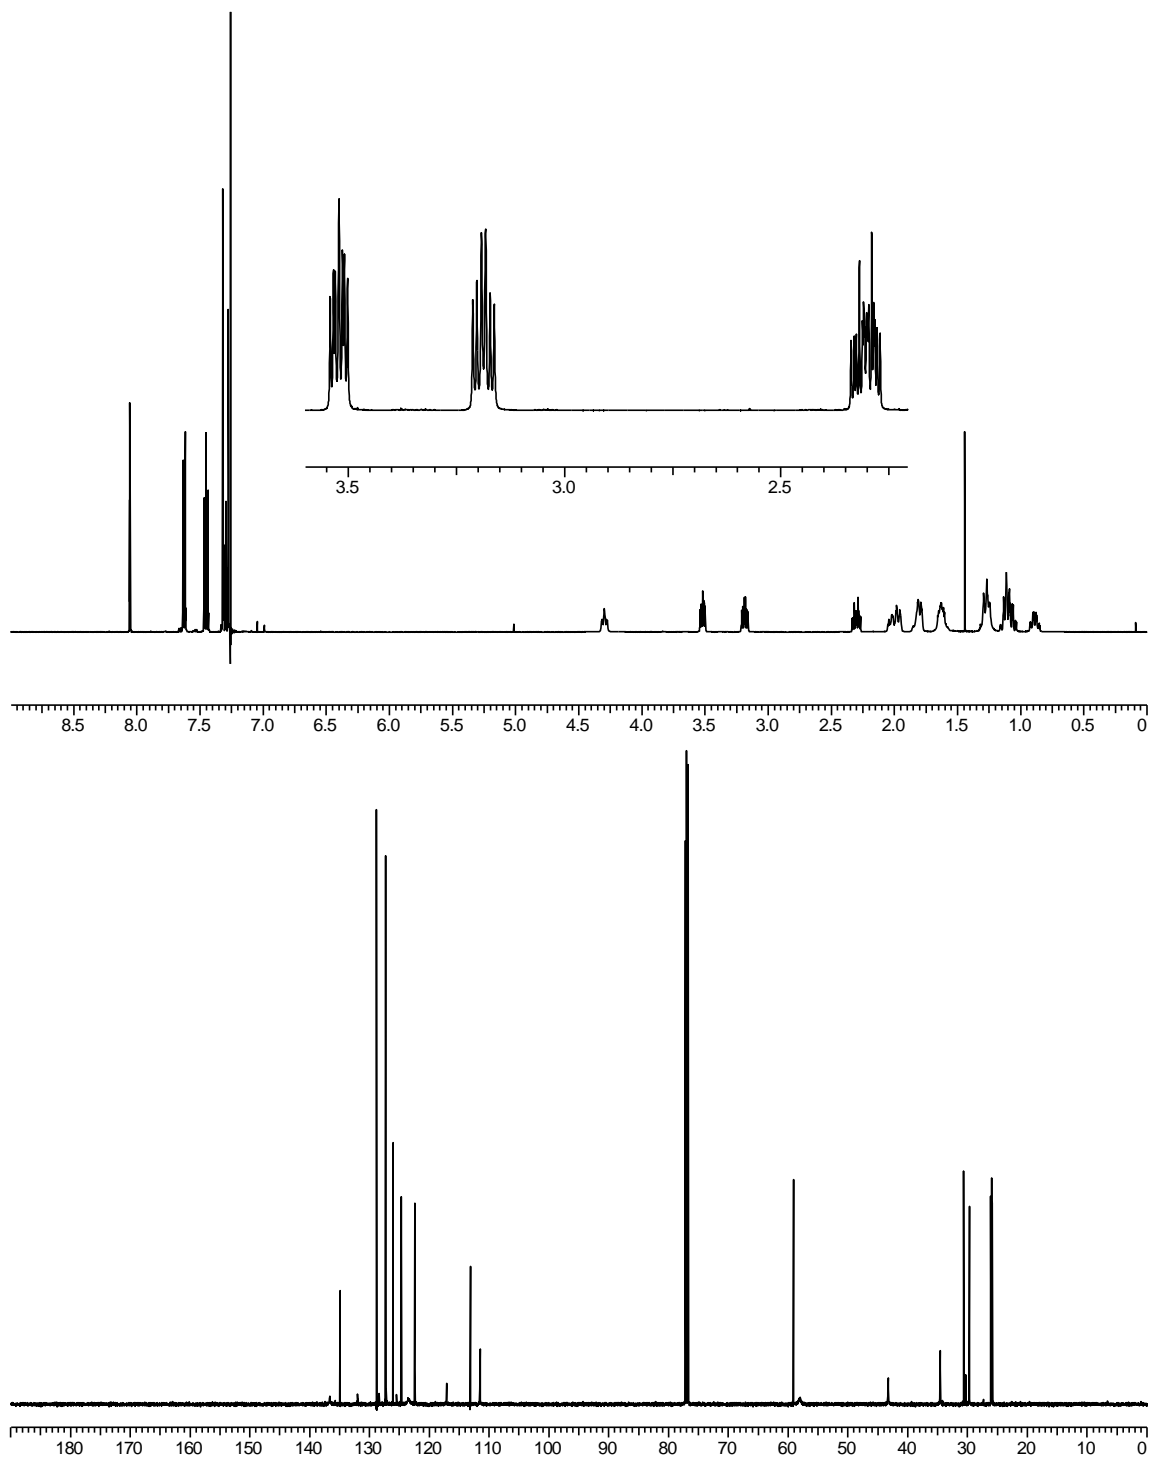

Supplementary figure 22.  $^1\text{H}$  and  $^{13}\text{C}$  NMR spectra for product **2gee**

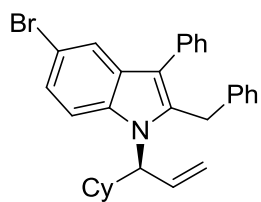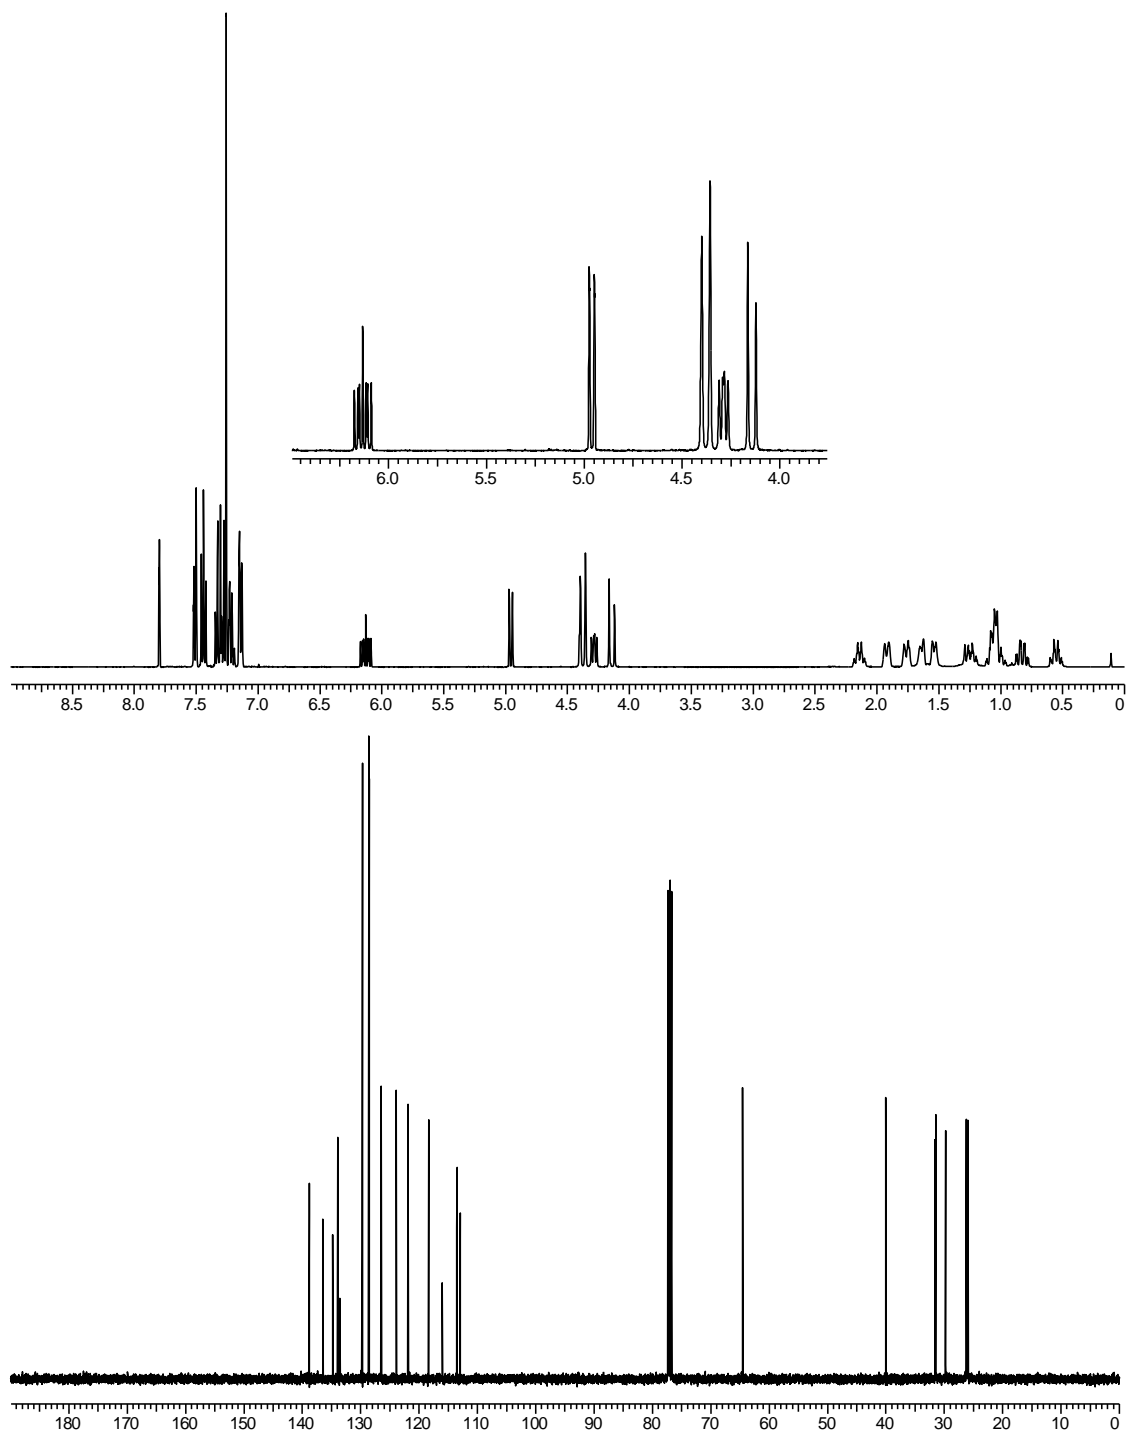

Supplementary figure 23.  $^1\text{H}$  and  $^{13}\text{C}$  NMR spectra for product **2h**

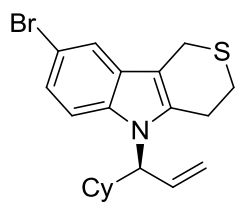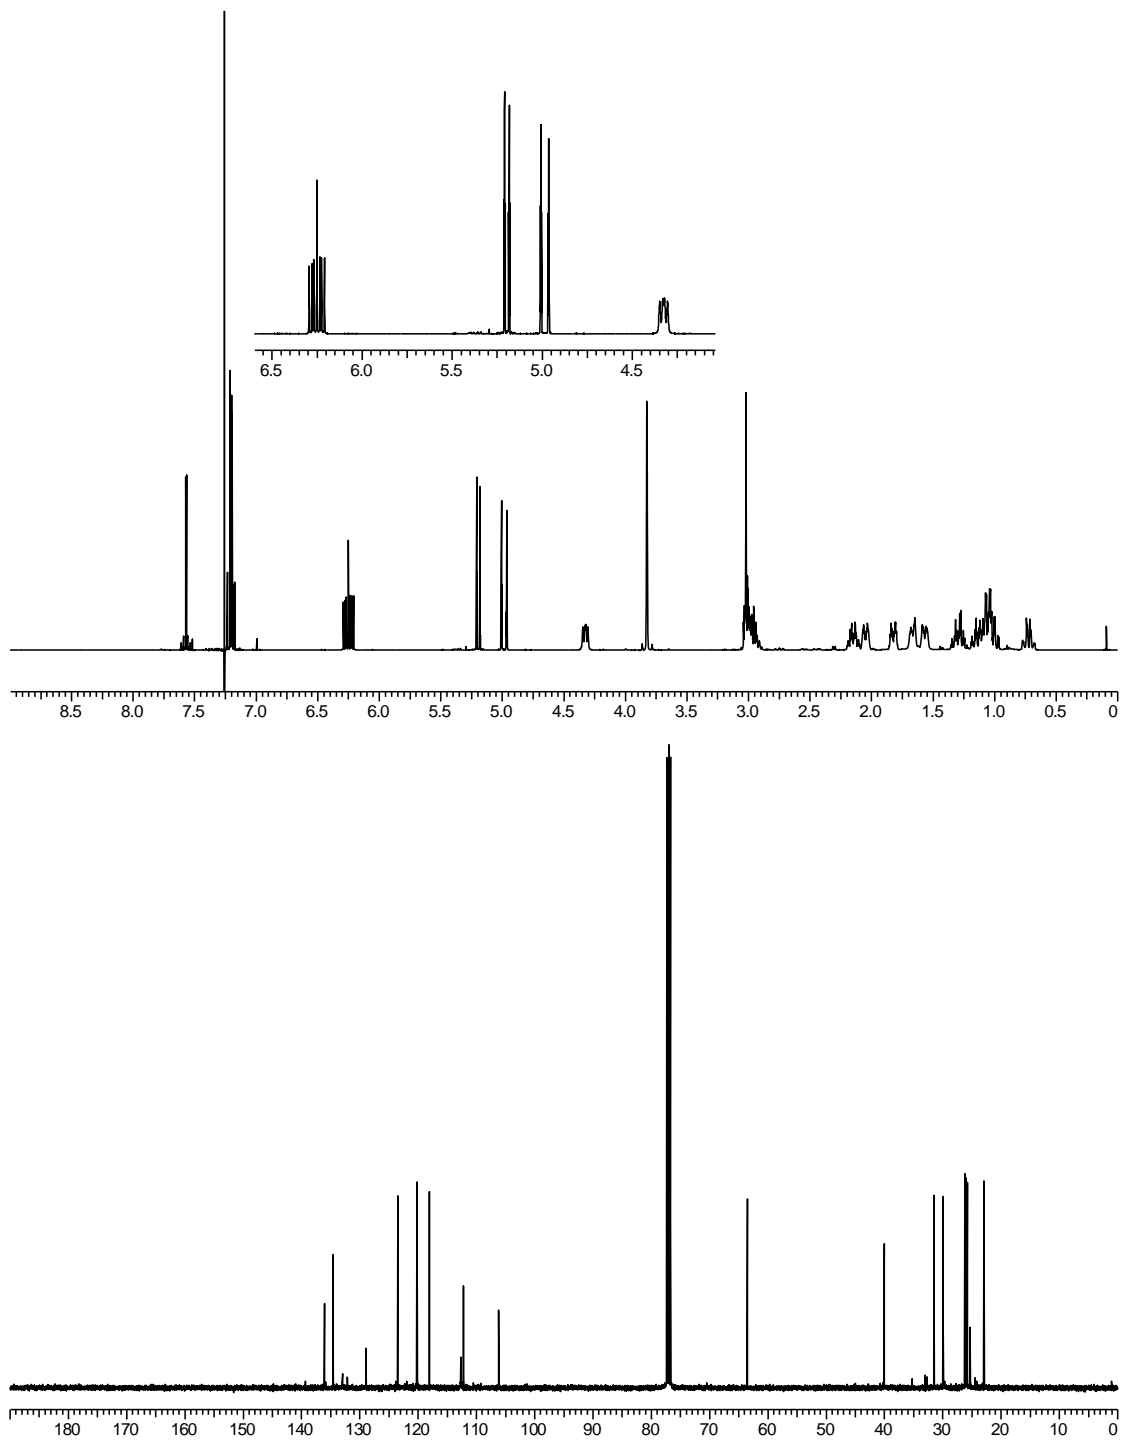

Supplementary figure 24.  $^1\text{H}$  and  $^{13}\text{C}$  NMR spectra for product **2i**



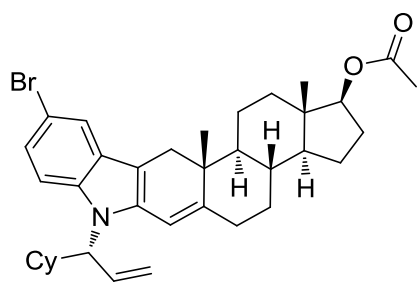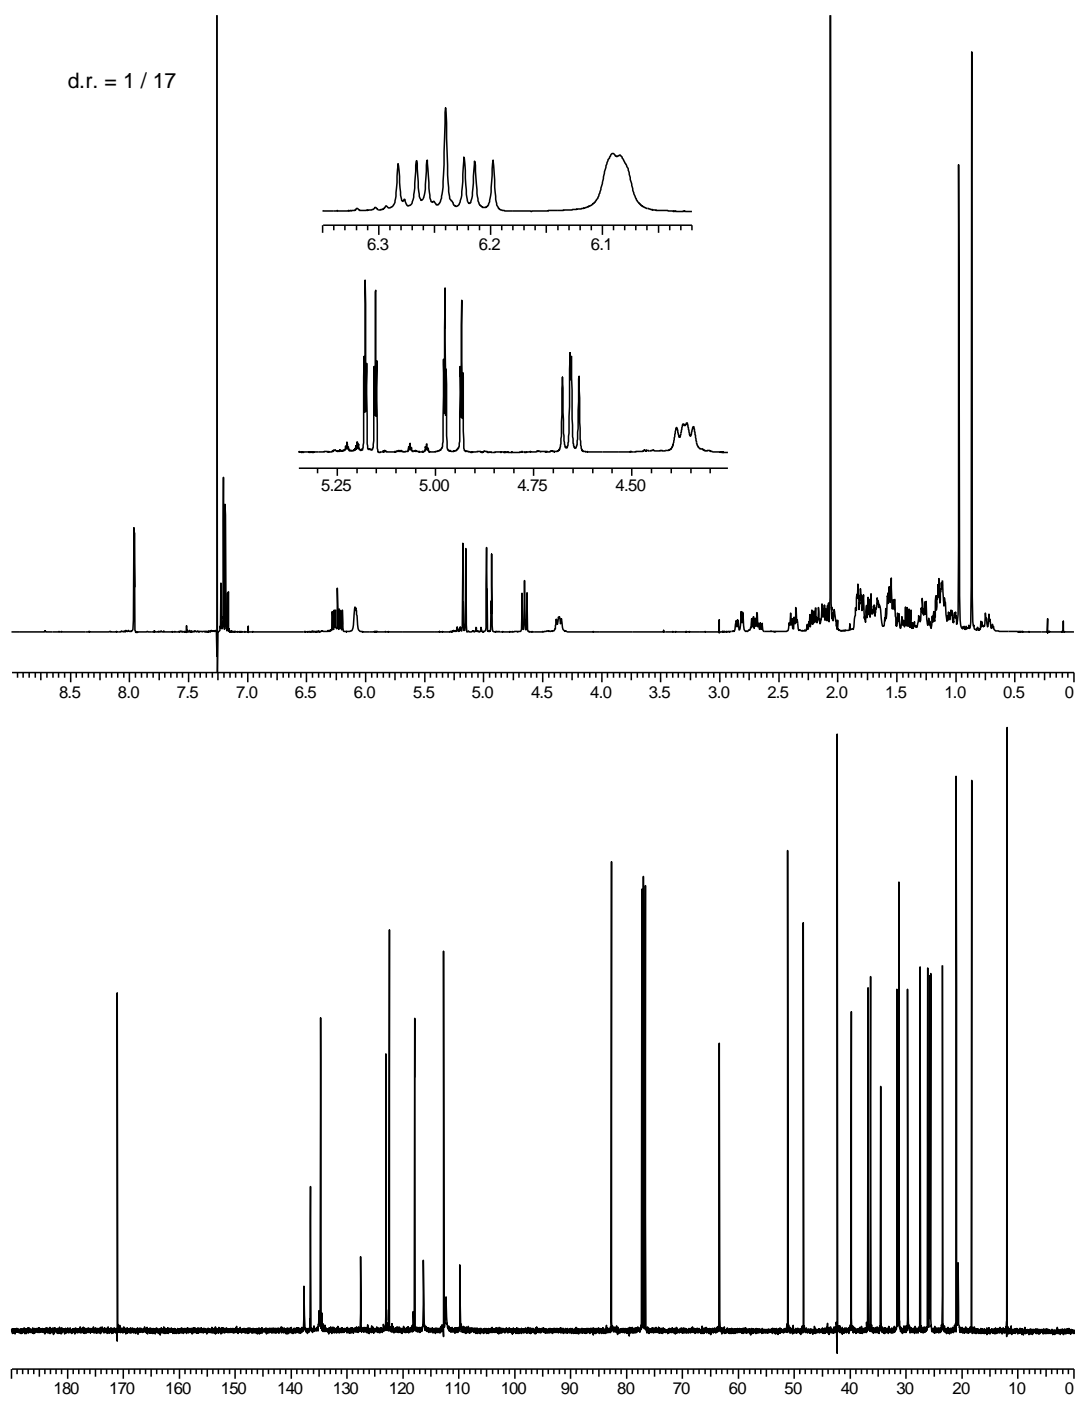

Supplementary figure 25. <sup>1</sup>H and <sup>13</sup>C NMR spectra for product 3

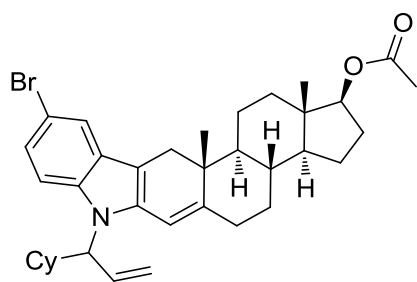

Supplementary figure 26. <sup>1</sup>H and <sup>13</sup>C NMR spectra for racemic product of **3**

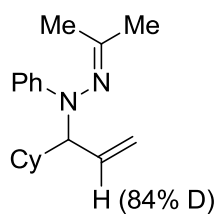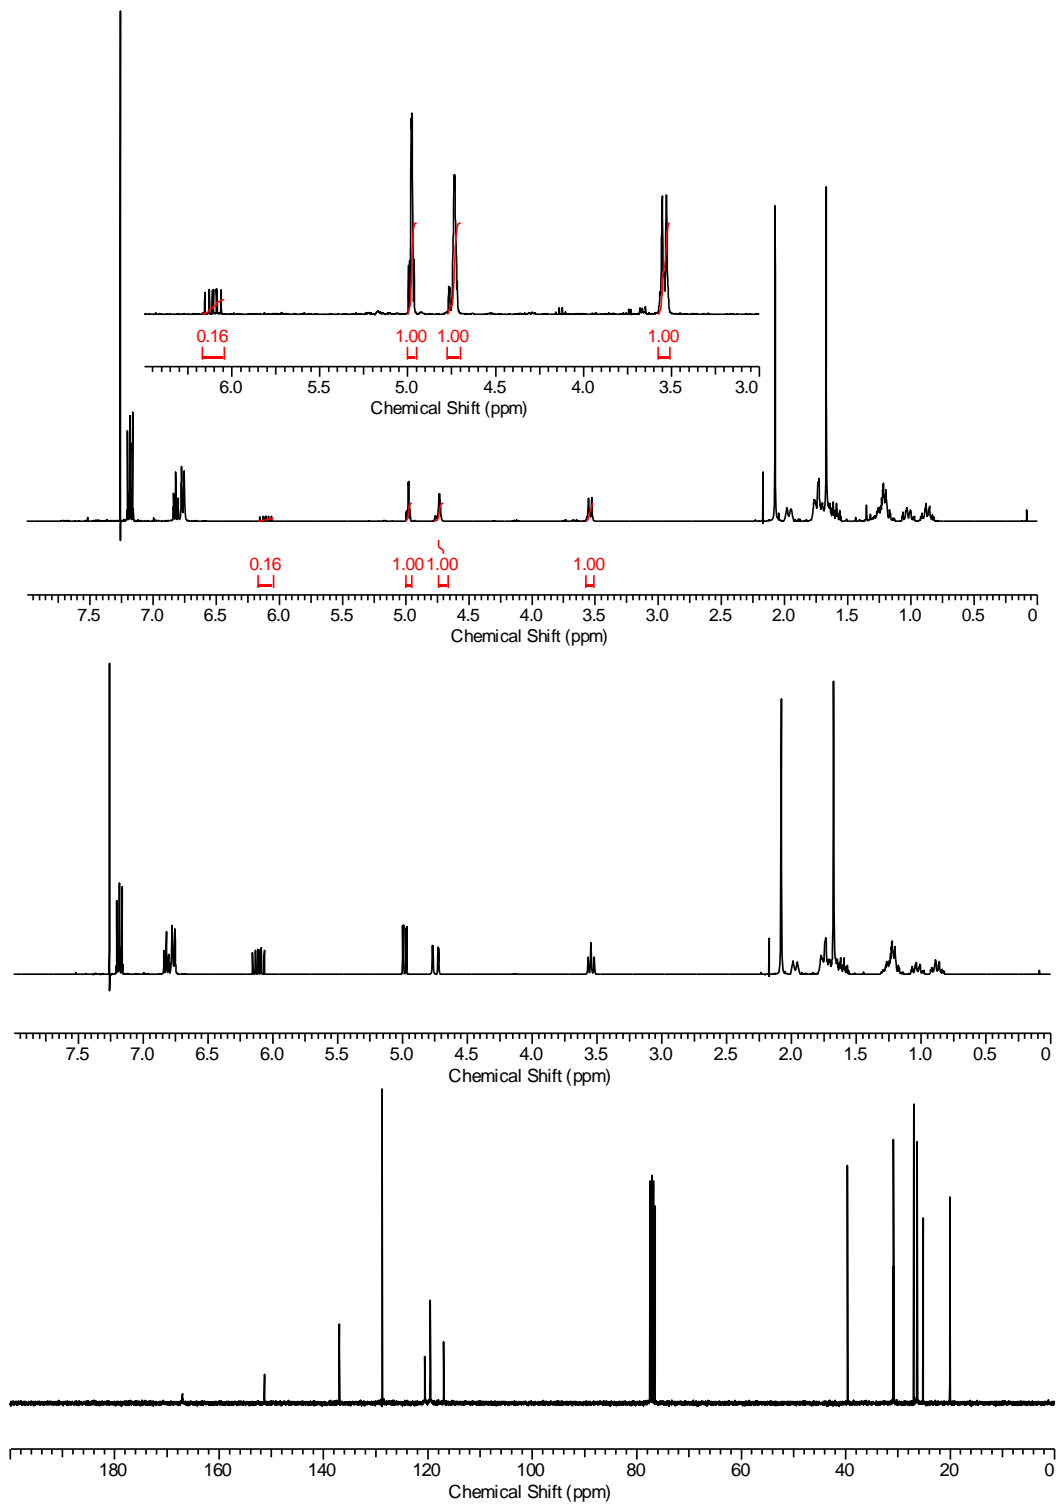

Supplementary figure 27.  $^1\text{H}$  NMR of 5,  $^1\text{H}$  NMR and  $^{13}\text{C}$  NMR of non-deuterated sample of 5

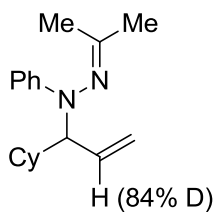

File Name : T:\xubtd40t\_hr1.ms2  
 Creation Date/Time : 29.10.2014 at 15:45:49  
 File Type : Hi-Res Mass/Int data  
 File Source : Imported from ANDI/MS format  
 file D:\ausgabe\xubtd40t\_hr1.cdf  
 File Title : kx9089\_pos.apci  
 Operator : ExactiveUser  
 Notes : Source: D:\data\_2014\xubtd40t\_hr1.RAW  
 Format: Finnigan

SCAN GRAPH. Flagging=High Resolution M/z. Highlighting=Base Peak.

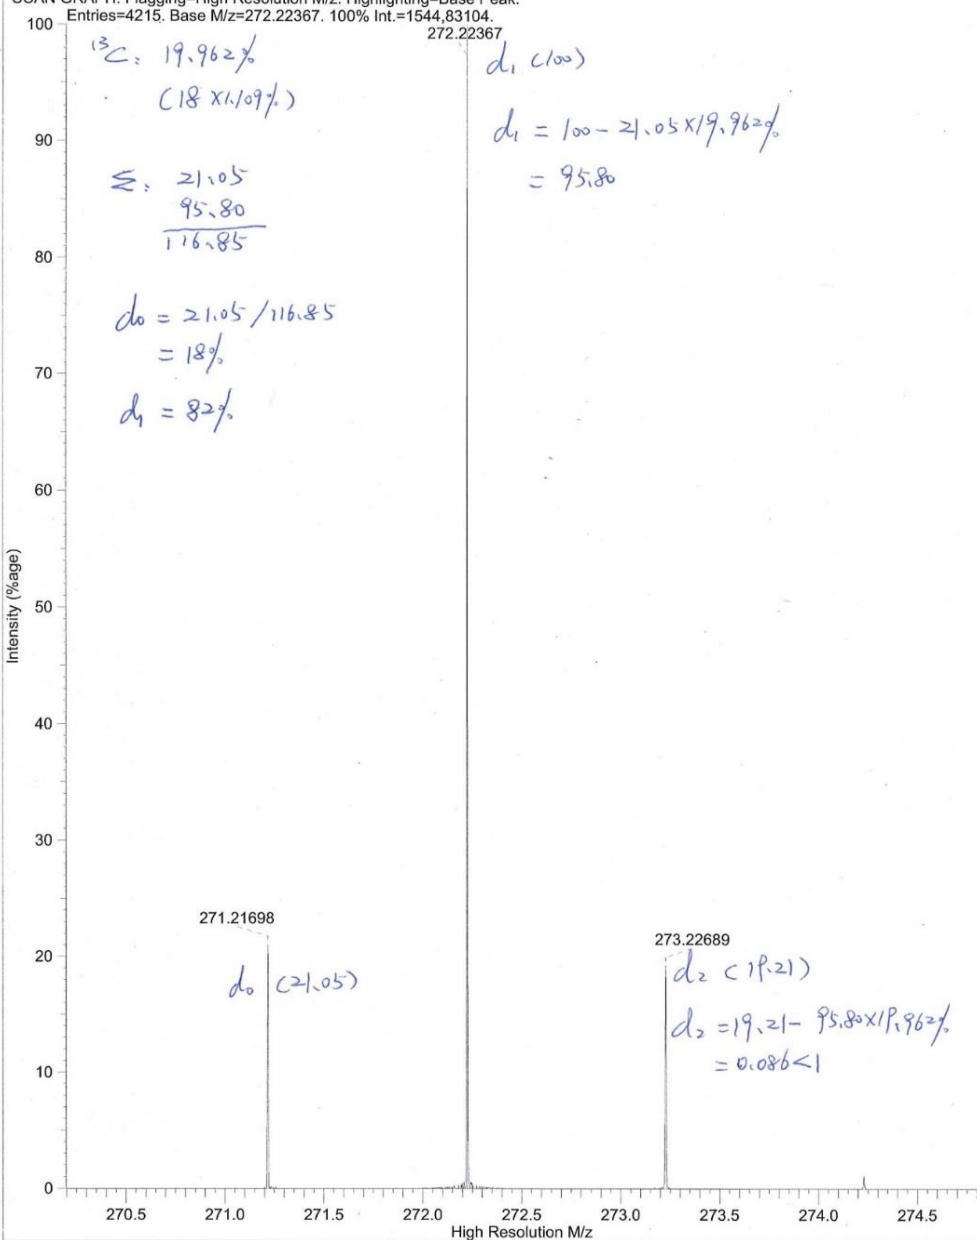

Supplementary figure 28. HRMS spectrum of 5

$^1\text{H}$  NMR (500 MHz,  $\text{CDCl}_3$ ) at 263 K (Oxidative Addition: Rh-H formation)

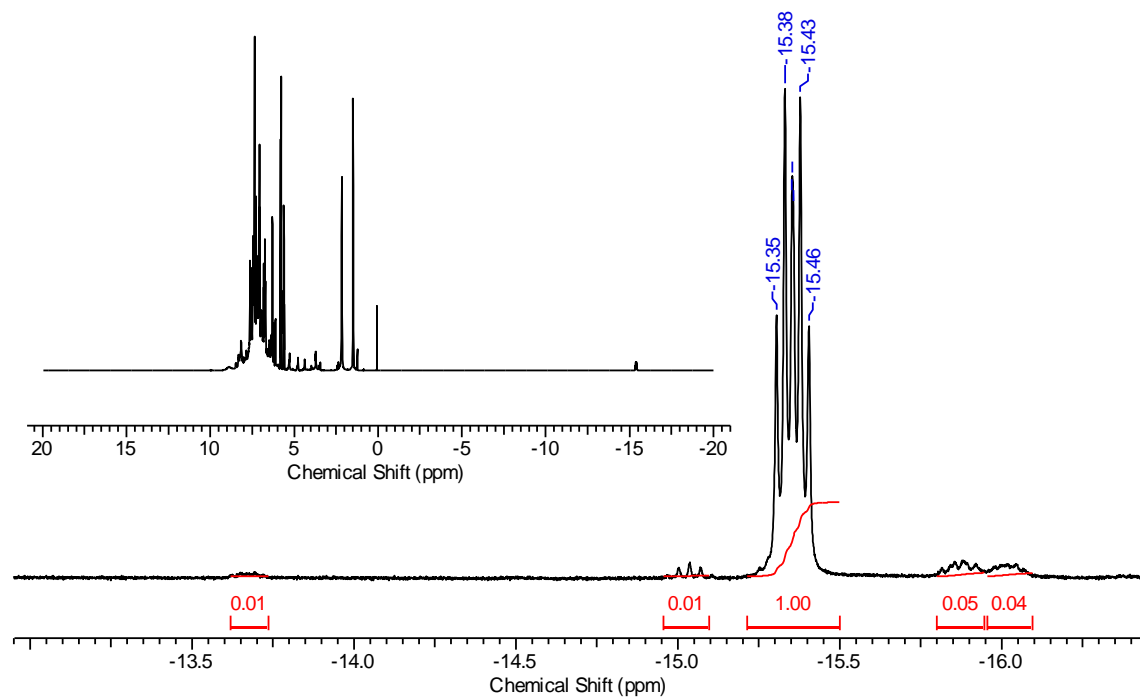

$^1\text{H}$  NMR (500 MHz,  $\text{CDCl}_3$ )  $\delta = -15.40$  (d,  $J = 14.0$  Hz, 1 H), 263 K,  $^{31}\text{P}$  decoupled

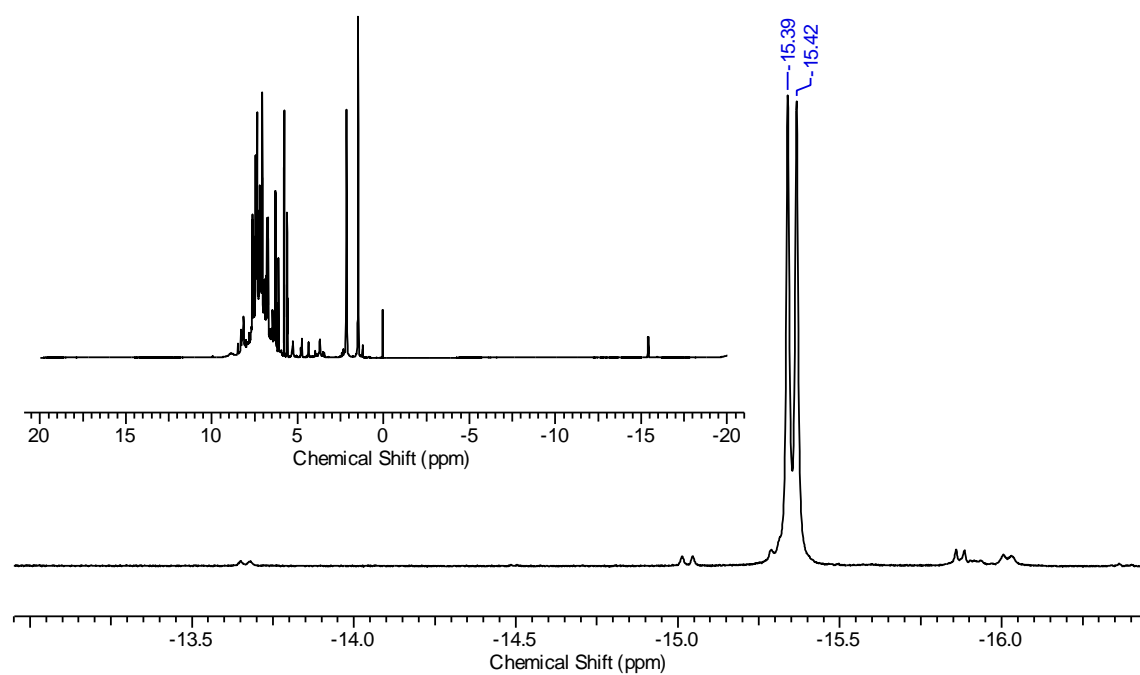

Supplementary figure 29.  $^1\text{H}$  NMR for Stoichiometric Reaction of phenylhydrazine with catalysts

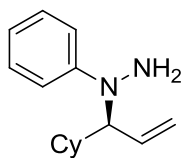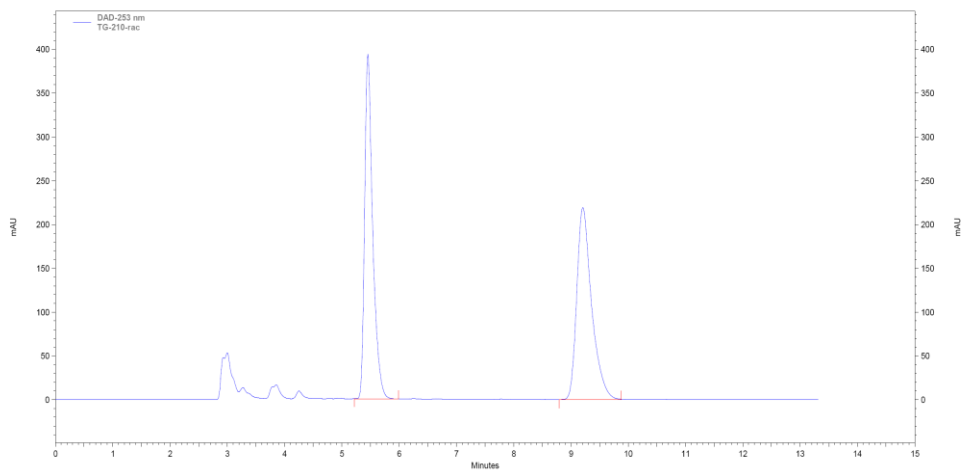

DAD-253 nm  
Results

| Pk # | Retention Time | Area Percent | Lambda Max |
|------|----------------|--------------|------------|
| 1    | 5,453          | 49,417       | 207        |
| 2    | 9,207          | 50,583       | 206        |

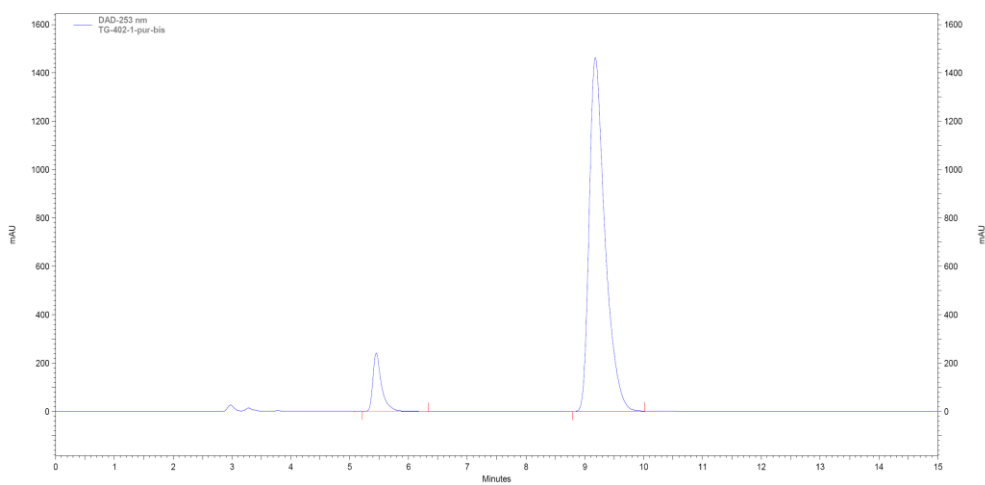

DAD-253 nm  
Results

| Pk # | Retention Time | Area Percent | Lambda Max |
|------|----------------|--------------|------------|
| 1    | 5,453          | 8,251        | 206        |
| 2    | 9,180          | 91,749       | 253        |

Supplementary figure 30. HPLC spectra for product 1a

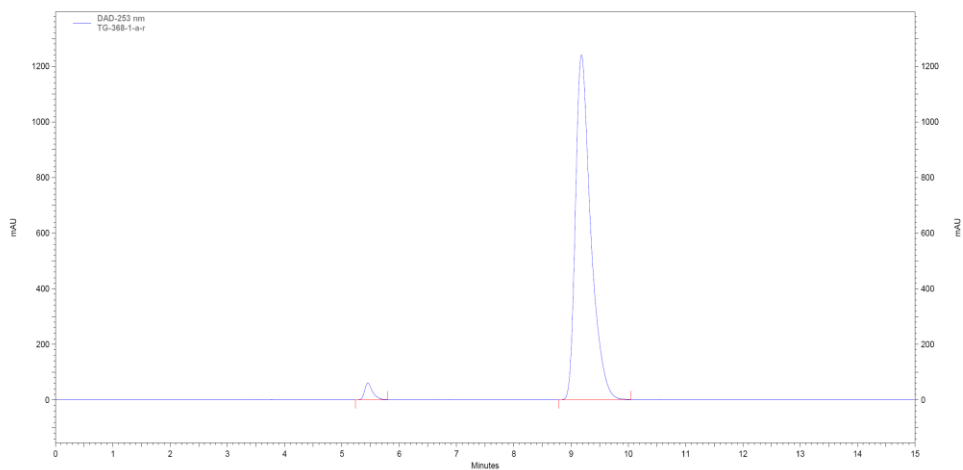

DAD-252 nm  
Results

| Pk # | Retention Time | Area Percent | Lambda Max |
|------|----------------|--------------|------------|
| 1    | 5,453          | 2,515        | 206        |
| 2    | 9,180          | 97,485       | 208        |

Supplementary figure 31. HPLC spectra for product **1a** (after recrystallization)

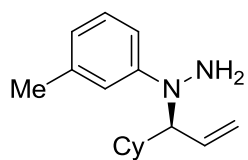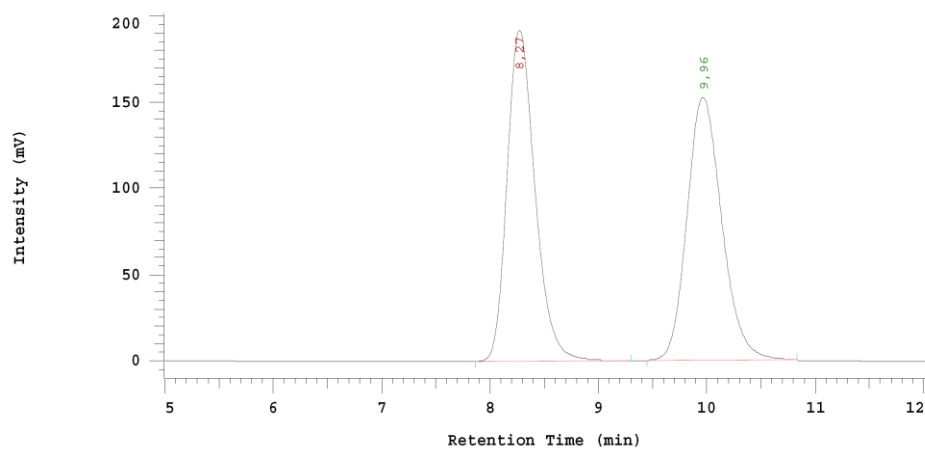

| No. | RT   | Area    | Area %  | BC |
|-----|------|---------|---------|----|
| 1   | 8,27 | 3376073 | 49,977  | MC |
| 2   | 9,96 | 3379226 | 50,023  | BB |
|     |      | 6755299 | 100,000 |    |

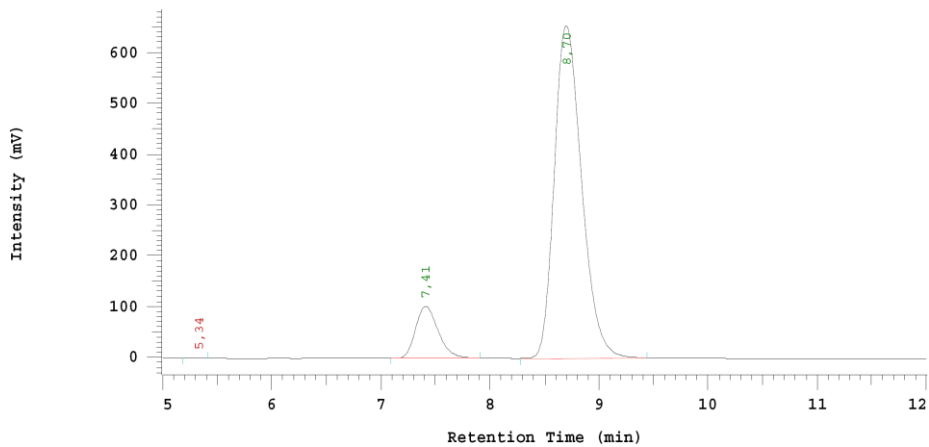

| No. | RT   | Area     | Area %  | BC |
|-----|------|----------|---------|----|
| 1   | 3,26 | 0        | 0,000   |    |
| 2   | 3,63 | 0        | 0,000   |    |
| 3   | 3,97 | 0        | 0,000   |    |
| 4   | 5,34 | 0        | 0,000   |    |
| 5   | 7,41 | 1439851  | 11,416  | BB |
| 6   | 8,70 | 11172604 | 88,584  | BB |
|     |      | 12612455 | 100,000 |    |

Supplementary figure 32. HPLC spectra for product **1b**



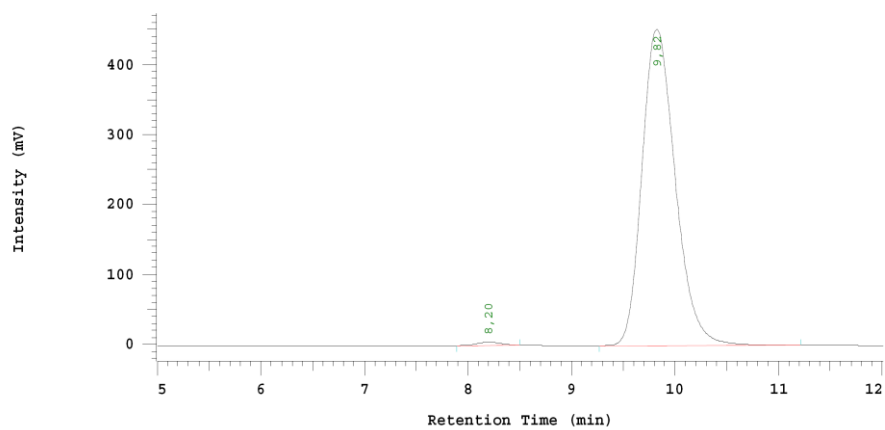

| No. | RT    | Area     | Area %  | BC |
|-----|-------|----------|---------|----|
| 1   | 8,20  | 72110    | 0,716   | BB |
| 2   | 9,82  | 9998086  | 99,284  | BB |
| 3   | 14,60 | 0        | 0,000   |    |
|     |       | 10070196 | 100,000 |    |

**Supplementary figure 33.** HPLC spectra for product **1b** (after recrystallization)

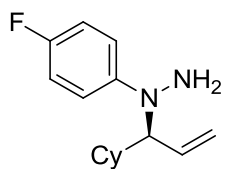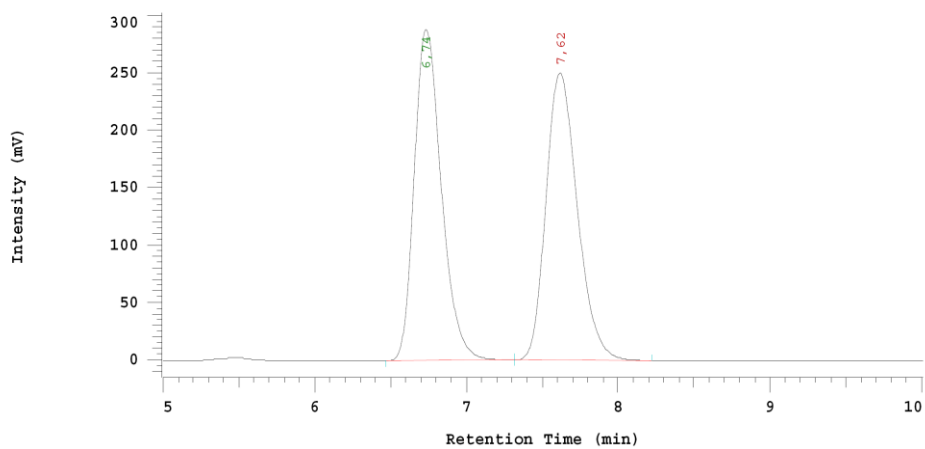

| No. | RT    | Area    | Area %  | BC |
|-----|-------|---------|---------|----|
| 1   | 6,74  | 3517516 | 49,968  | BB |
| 2   | 7,62  | 3522080 | 50,032  | MC |
| 3   | 14,31 | 0       | 0,000   |    |
|     |       | 7039596 | 100,000 |    |

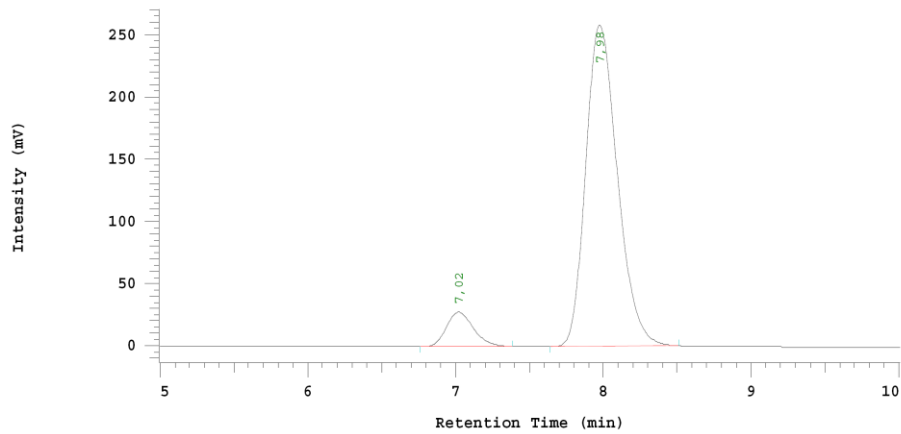

| No. | RT   | Area    | Area %  | BC |
|-----|------|---------|---------|----|
| 1   | 7,02 | 346681  | 8,343   | BB |
| 2   | 7,98 | 3808726 | 91,657  | BB |
|     |      | 4155407 | 100,000 |    |

Supplementary figure 34. HPLC spectra for product **1c**

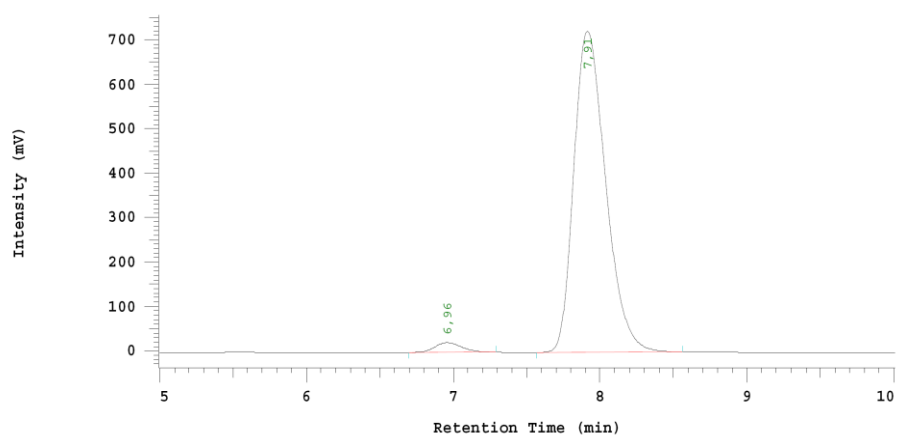

| No. | RT   | Area     | Area %  | BC |
|-----|------|----------|---------|----|
| 1   | 6,96 | 267823   | 2,435   | BB |
| 2   | 7,91 | 10729172 | 97,565  | BB |
|     |      | 10996995 | 100,000 |    |

**Supplementary figure 35.** HPLC spectra for product **1c** (after recrystallization)

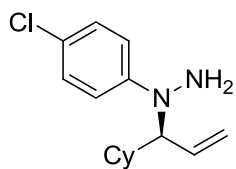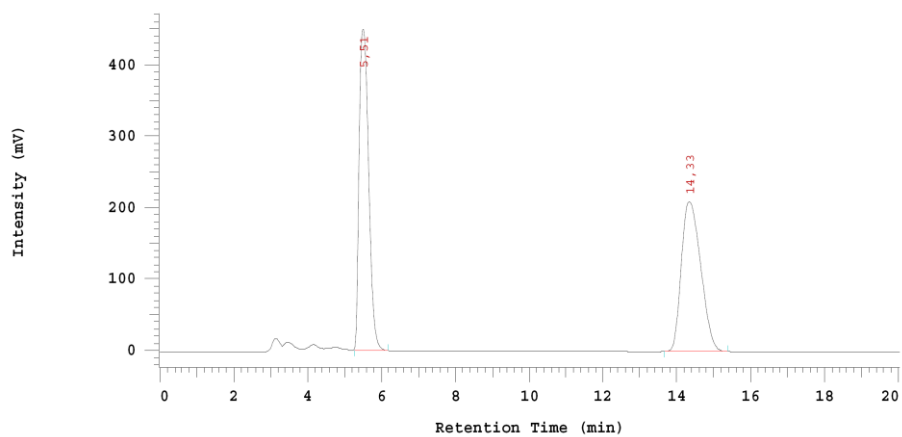

| No. | RT    | Area     | Area %  | BC |
|-----|-------|----------|---------|----|
| 1   | 5,51  | 7409244  | 50,037  | MC |
| 2   | 14,33 | 7398314  | 49,963  | MC |
|     |       | 14807558 | 100,000 |    |

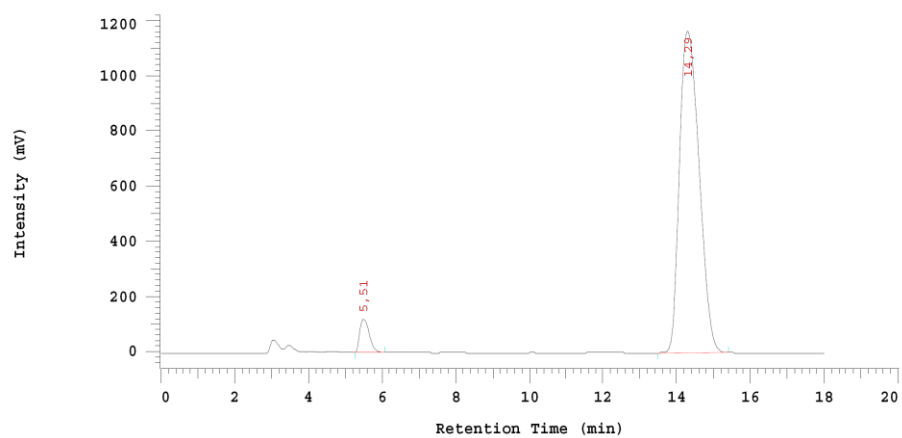

| No. | RT    | Area     | Area %  | BC |
|-----|-------|----------|---------|----|
| 1   | 5,51  | 2013450  | 4,602   | MC |
| 2   | 14,29 | 41735130 | 95,398  | MC |
|     |       | 43748580 | 100,000 |    |

Supplementary figure 36. HPLC spectra for product 1d

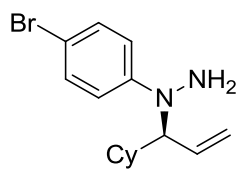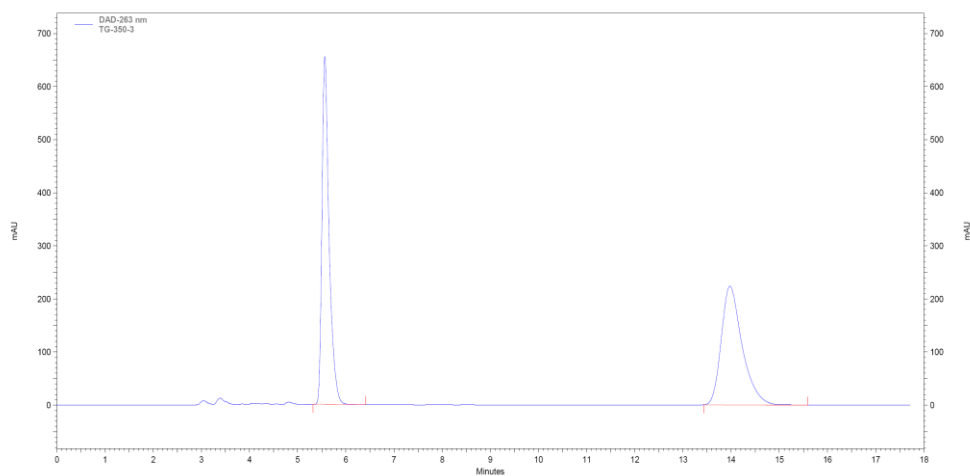

**DAD-263 nm Results**

| Pk # | Retention Time | Area Percent | Lambda Max |
|------|----------------|--------------|------------|
| 1    | 5,560          | 50,025       | 262        |
| 2    | 13,973         | 49,975       | 262        |

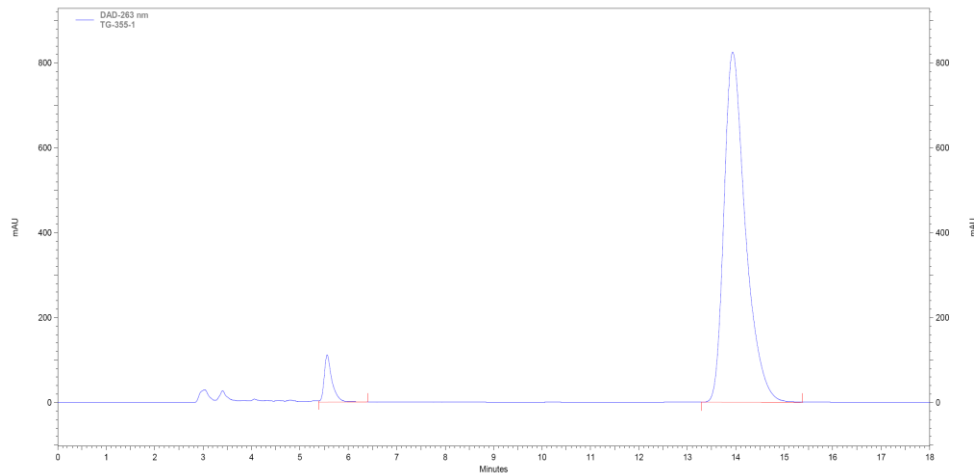

**DAD-263 nm Results**

| Pk # | Retention Time | Area Percent | Lambda Max |
|------|----------------|--------------|------------|
| 1    | 5,560          | 4,667        | 262        |
| 2    | 13,940         | 95,333       | 262        |

Supplementary figure 37. HPLC spectra for product 1e

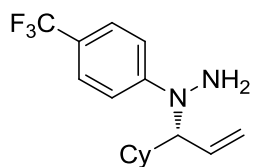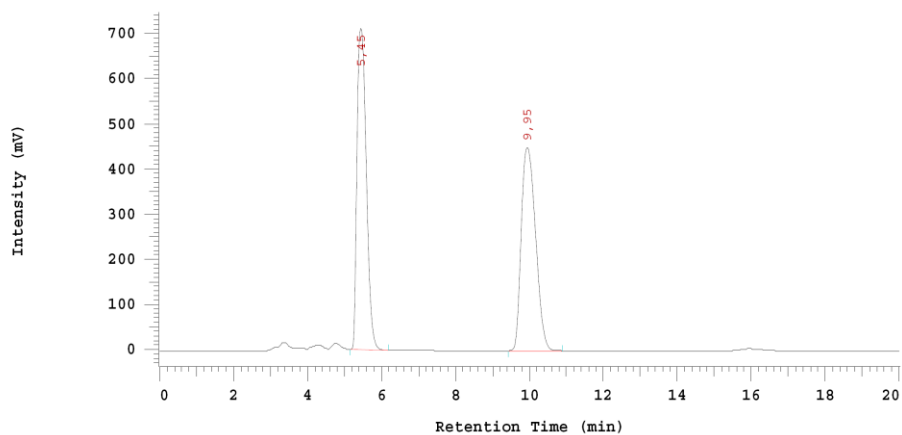

| No. | RT   | Area     | Area %  | BC |
|-----|------|----------|---------|----|
| 1   | 5,45 | 11459357 | 49,823  | MC |
| 2   | 9,95 | 11540588 | 50,177  | MC |
|     |      | 22999945 | 100,000 |    |

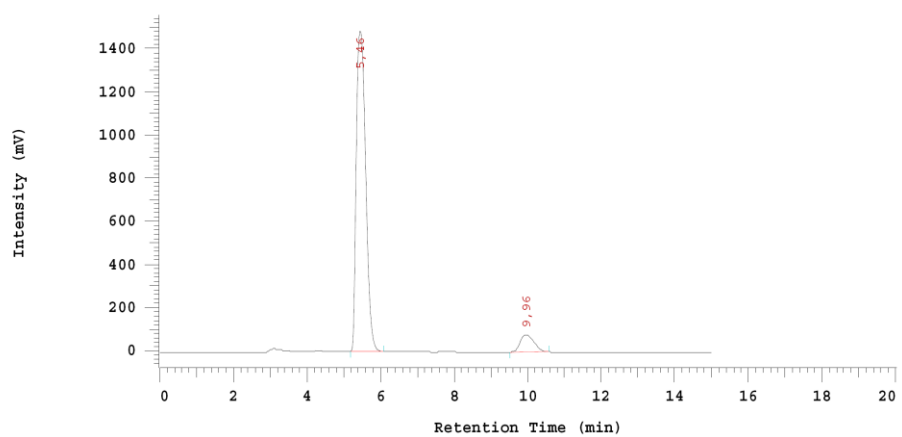

| No. | RT   | Area     | Area %  | BC |
|-----|------|----------|---------|----|
| 1   | 5,46 | 24229995 | 92,409  | MC |
| 2   | 9,96 | 1990272  | 7,591   | MC |
|     |      | 26220267 | 100,000 |    |

Supplementary figure 38. HPLC spectra for product **1f**

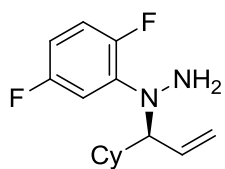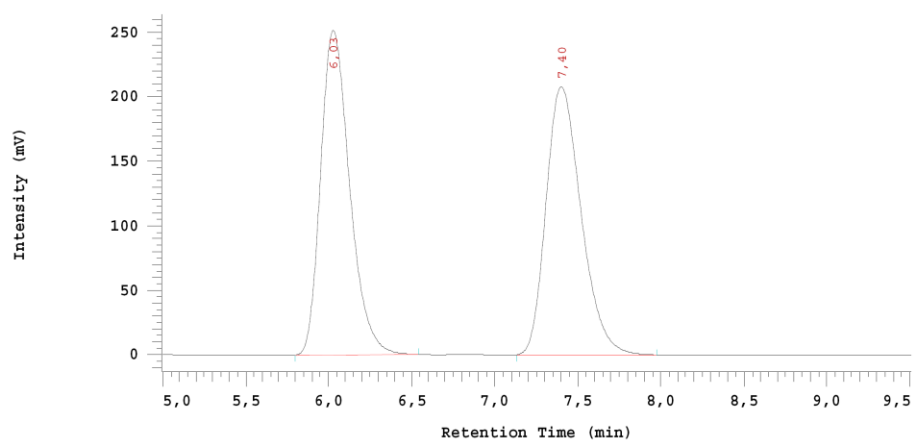

| No. | RT    | Area    | Area %  | BC |
|-----|-------|---------|---------|----|
| 1   | 6,03  | 3026685 | 49,498  | MC |
| 2   | 7,40  | 3016955 | 49,339  | MC |
| 3   | 12,61 | 71120   | 1,163   | BB |
|     |       | 6114760 | 100,000 |    |

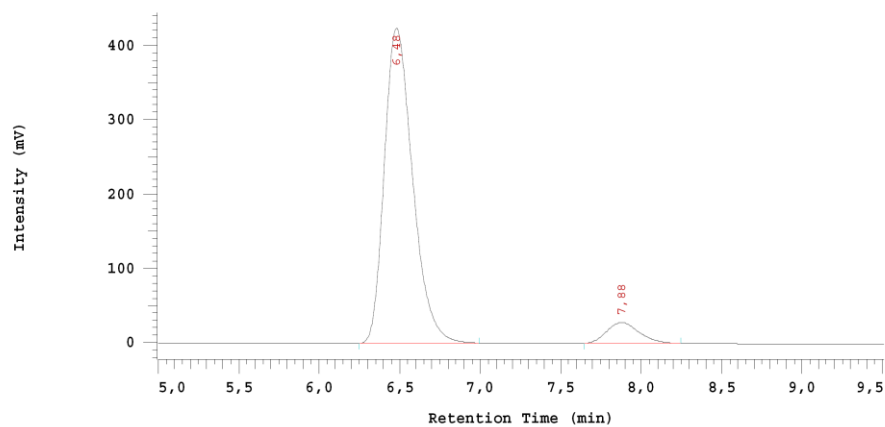

| No. | RT   | Area    | Area %  | BC |
|-----|------|---------|---------|----|
| 1   | 6,48 | 5099496 | 92,877  | MC |
| 2   | 7,88 | 391099  | 7,123   | MC |
|     |      | 5490595 | 100,000 |    |

Supplementary figure 39. HPLC spectra for product **1g**

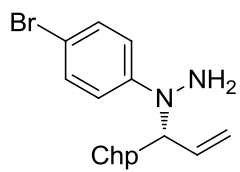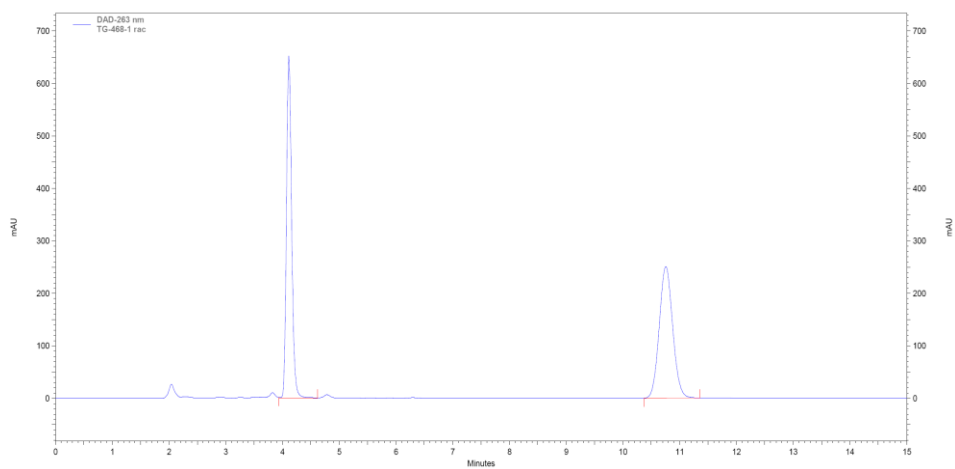

DAD-263 nm

Results

| Pk # | Retention Time | Area Percent | Lambda Max |
|------|----------------|--------------|------------|
| 1    | 4,113          | 50,020       | 262        |
| 2    | 10,753         | 49,980       | 262        |

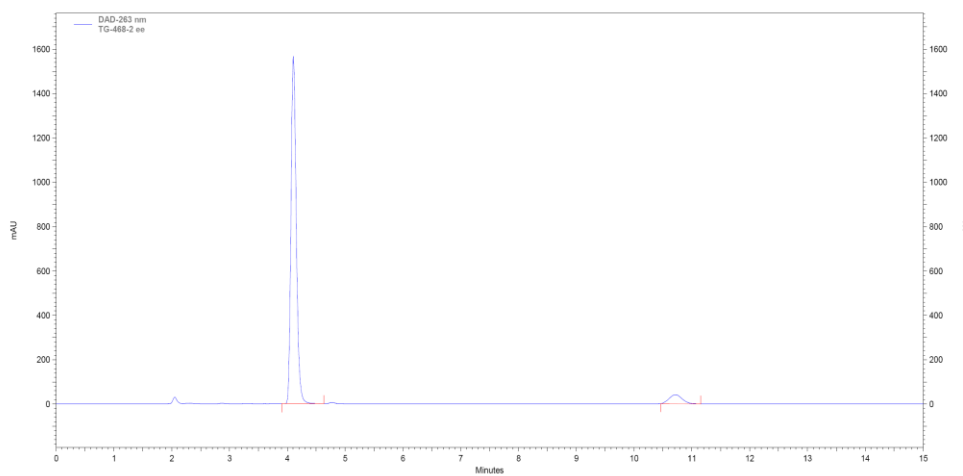

DAD-263 nm

Results

| Pk # | Retention Time | Area Percent | Lambda Max |
|------|----------------|--------------|------------|
| 1    | 4,107          | 94,022       | 262        |
| 2    | 10,713         | 5,978        | 206        |

Supplementary figure 40. HPLC spectra for product 1h



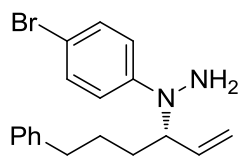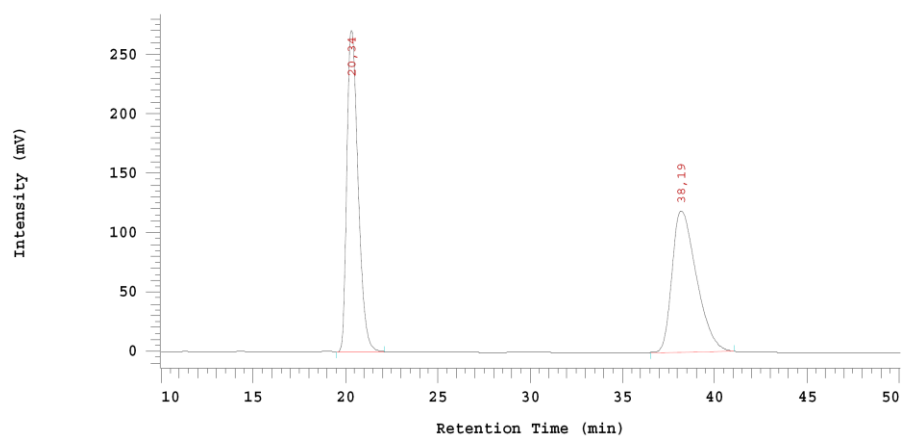

| No. | RT    | Area     | Area %  | BC |
|-----|-------|----------|---------|----|
| 1   | 20,34 | 10696940 | 50,135  | MC |
| 2   | 38,19 | 10639236 | 49,865  | MC |
|     |       | 21336176 | 100,000 |    |

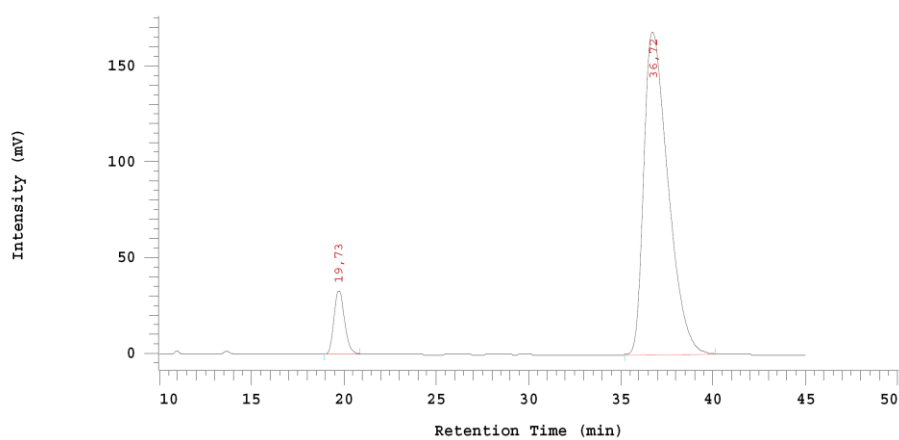

| No. | RT    | Area     | Area %  | BC |
|-----|-------|----------|---------|----|
| 1   | 19,73 | 1256508  | 7,774   | MC |
| 2   | 36,72 | 14906753 | 92,226  | MC |
|     |       | 16163261 | 100,000 |    |

Supplementary figure 41. HPLC spectra for product **1i**

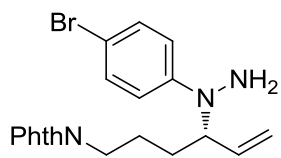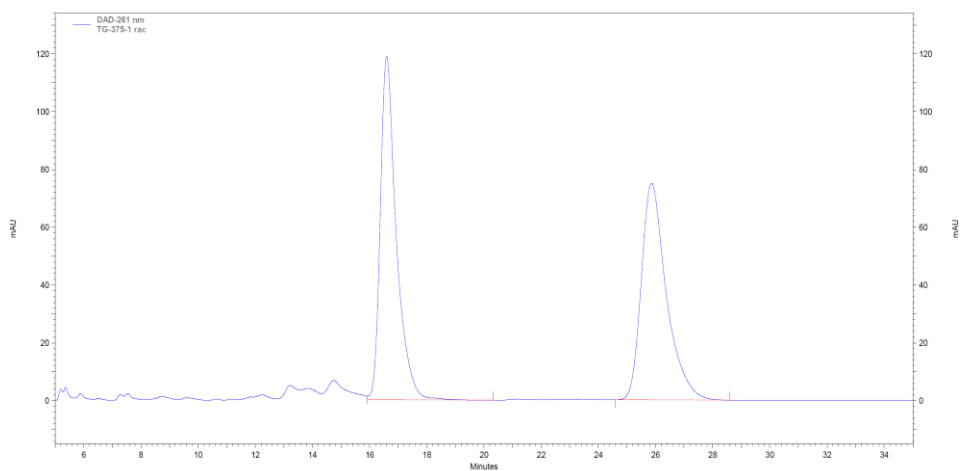

DAD-261 nm  
Results

| Pk # | Retention Time | Area Percent | Lambda Max |
|------|----------------|--------------|------------|
| 1    | 16,593         | 50,321       | 218        |
| 2    | 25,867         | 49,679       | 218        |

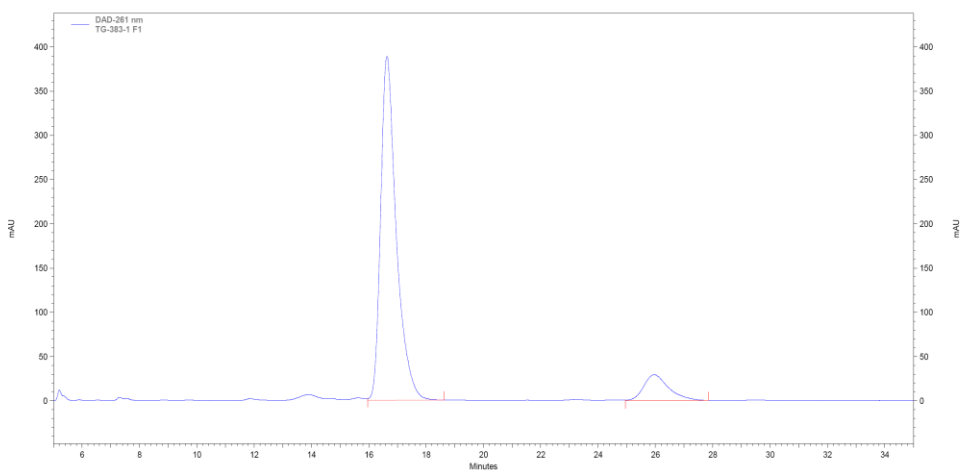

DAD-261 nm  
Results

| Pk # | Retention Time | Area Percent | Lambda Max |
|------|----------------|--------------|------------|
| 1    | 16,633         | 89,226       | 218        |
| 2    | 25,953         | 10,774       | 218        |

Supplementary figure 42. HPLC spectra for product 1j

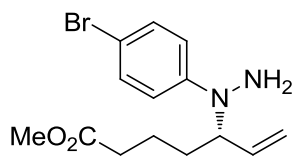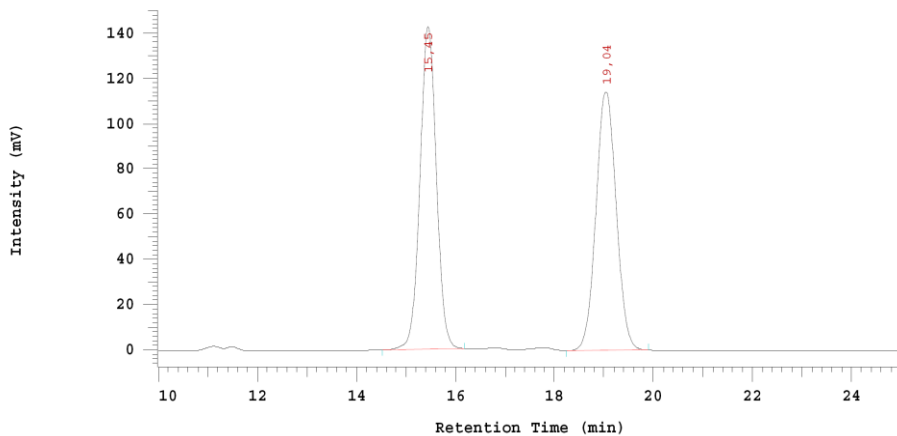

| No. | RT    | Area    | Area %  | BC |
|-----|-------|---------|---------|----|
| 1   | 15,45 | 3193747 | 50,278  | MC |
| 2   | 19,04 | 3158431 | 49,722  | MC |
|     |       | 6352178 | 100,000 |    |

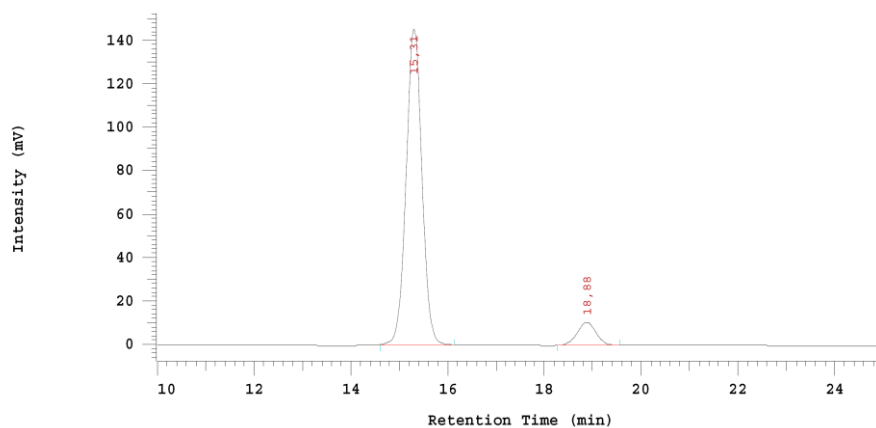

| No. | RT    | Area    | Area %  | BC |
|-----|-------|---------|---------|----|
| 1   | 15,31 | 3211045 | 91,928  | MC |
| 2   | 18,88 | 281966  | 8,072   | MC |
|     |       | 3493011 | 100,000 |    |

Supplementary figure 43. HPLC spectra for product 1k

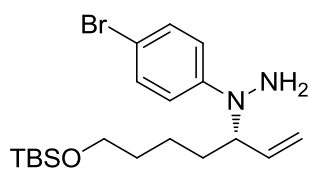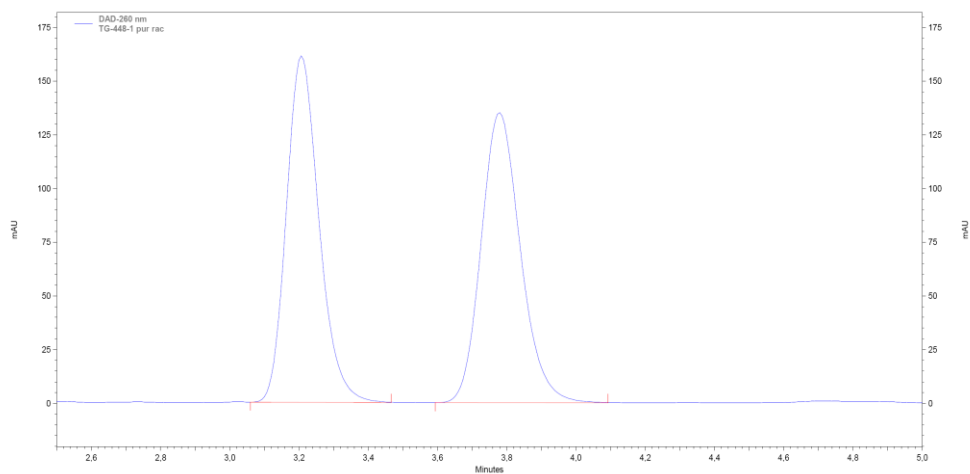

DAD-260 nm  
Results

| Pk # | Retention Time | Area Percent | Lambda Max |
|------|----------------|--------------|------------|
| 1    | 3,207          | 49,819       | 206        |
| 2    | 3,780          | 50,181       | 206        |

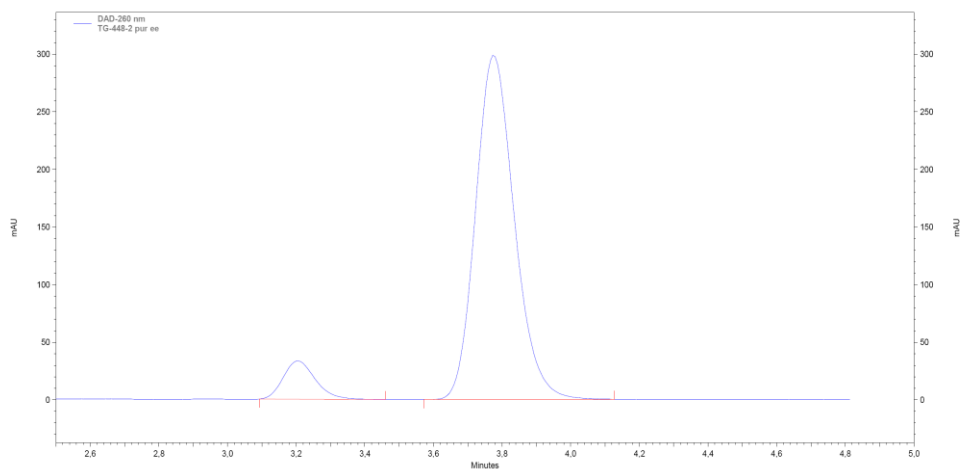

DAD-260 nm  
Results

| Pk # | Retention Time | Area Percent | Lambda Max |
|------|----------------|--------------|------------|
| 1    | 3,207          | 8,419        | 206        |
| 2    | 3,773          | 91,581       | 206        |

Supplementary figure 44. HPLC spectra for product 11

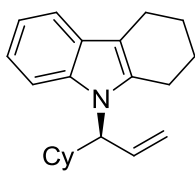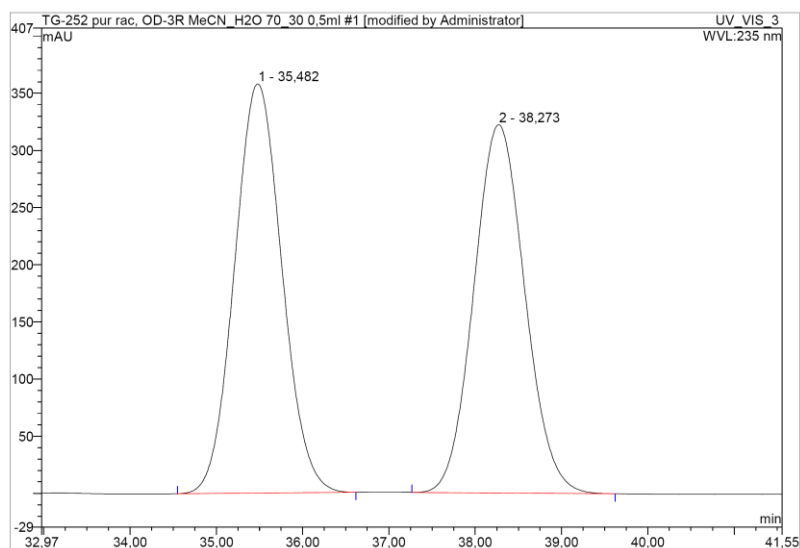

| No.           | Ret.Time<br>min | Peak Name | Height<br>mAU | Area<br>mAU*min | Rel.Area<br>% | Amount<br>n.a. | Type |
|---------------|-----------------|-----------|---------------|-----------------|---------------|----------------|------|
| 1             | 35,48           | n.a.      | 358,066       | 228,086         | 50,81         | n.a.           | BMB* |
| 2             | 38,27           | n.a.      | 322,130       | 220,789         | 49,19         | n.a.           | BMB* |
| <b>Total:</b> |                 |           | 680,195       | 448,874         | 100,00        | 0,000          |      |

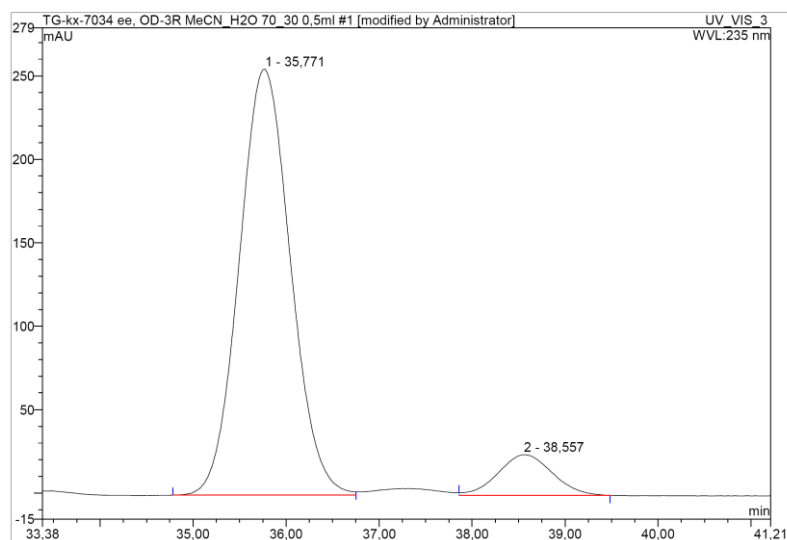

| No.           | Ret.Time<br>min | Peak Name | Height<br>mAU | Area<br>mAU*min | Rel.Area<br>% | Amount<br>n.a. | Type |
|---------------|-----------------|-----------|---------------|-----------------|---------------|----------------|------|
| 1             | 35,77           | n.a.      | 255,377       | 163,246         | 90,80         | n.a.           | BM * |
| 2             | 38,56           | n.a.      | 24,444        | 16,550          | 9,20          | n.a.           | MB*  |
| <b>Total:</b> |                 |           | 279,821       | 179,795         | 100,00        | 0,000          |      |

Supplementary figure 45. HPLC spectra for product 2a

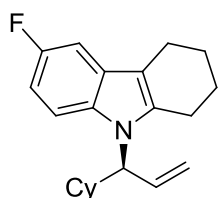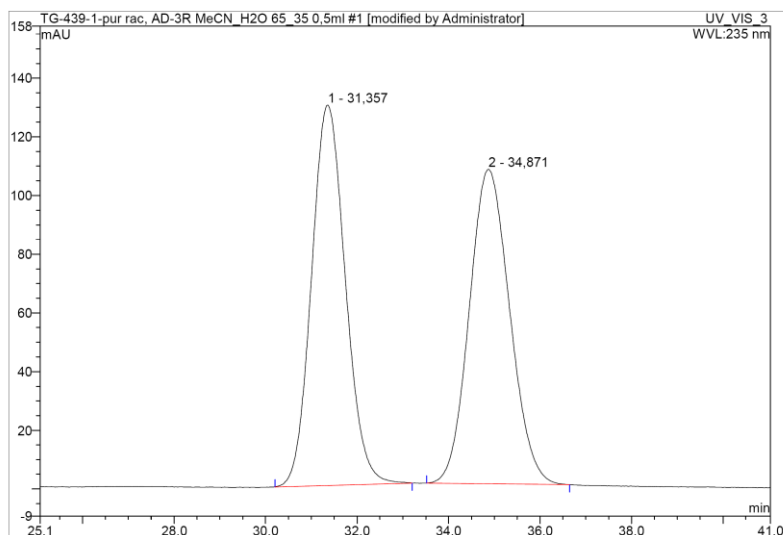

| No.           | Ret.Time<br>min | Peak Name | Height<br>mAU | Area<br>mAU*min | Rel.Area<br>% | Amount<br>n.a. | Type |
|---------------|-----------------|-----------|---------------|-----------------|---------------|----------------|------|
| 1             | 31,36           | n.a.      | 129,617       | 111,023         | 50,32         | n.a.           | BMB* |
| 2             | 34,87           | n.a.      | 107,134       | 109,632         | 49,68         | n.a.           | BMB* |
| <b>Total:</b> |                 |           | 236,751       | 220,656         | 100,00        | 0,000          |      |

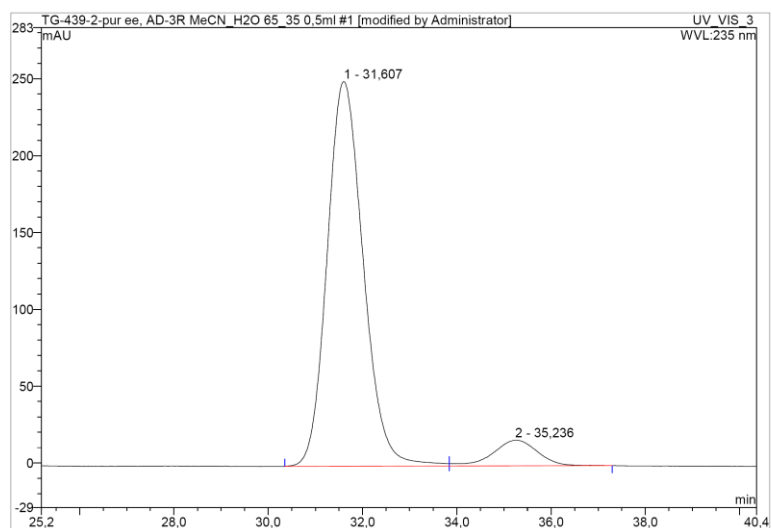

| No.           | Ret.Time<br>min | Peak Name | Height<br>mAU | Area<br>mAU*min | Rel.Area<br>% | Amount<br>n.a. | Type |
|---------------|-----------------|-----------|---------------|-----------------|---------------|----------------|------|
| 1             | 31,61           | n.a.      | 250,382       | 222,091         | 92,33         | n.a.           | BM   |
| 2             | 35,24           | n.a.      | 16,781        | 18,446          | 7,67          | n.a.           | MB   |
| <b>Total:</b> |                 |           | 267,162       | 240,537         | 100,00        | 0,000          |      |

Supplementary figure 46. HPLC spectra for product **2b**

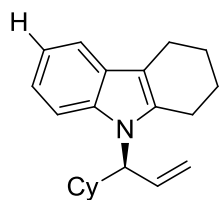

derivative of **2c**

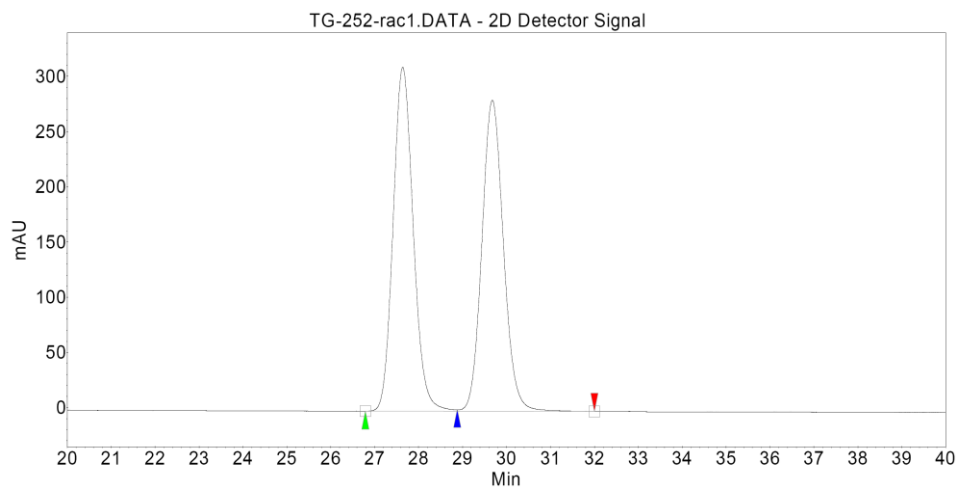

| Index | Name    | Time [Min] | Quantity [% Area] | Height [mAU] | Area [mAU.Min] | Area % [%] |
|-------|---------|------------|-------------------|--------------|----------------|------------|
| 1     | UNKNOWN | 27.64      | 49.62             | 311.7        | 165.4          | 49.622     |
| 2     | UNKNOWN | 29.68      | 48.03             | 281.8        | 160.1          | 48.032     |
| 3     | UNKNOWN | 54.86      | 2.35              | 7.5          | 7.8            | 2.346      |
| Total |         |            | 100.00            | 601.0        | 333.4          | 100.000    |

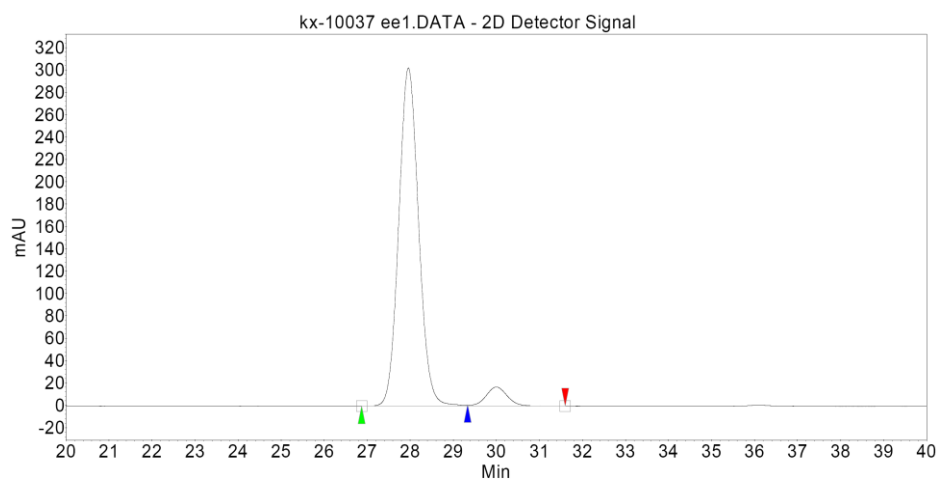

| Index | Name    | Time [Min] | Quantity [% Area] | Height [mAU] | Area [mAU.Min] | Area % [%] |
|-------|---------|------------|-------------------|--------------|----------------|------------|
| 1     | UNKNOWN | 27.96      | 94.32             | 302.4        | 161.9          | 94.320     |
| 2     | UNKNOWN | 30.00      | 5.68              | 17.0         | 9.7            | 5.680      |
| Total |         |            | 100.00            | 319.4        | 171.6          | 100.000    |

Supplementary figure 47. HPLC spectra for product **2cee**

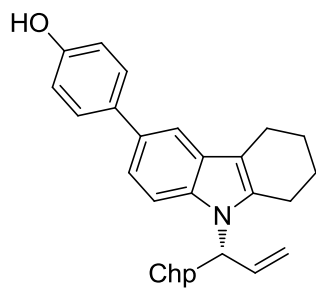

derivative of **2d**

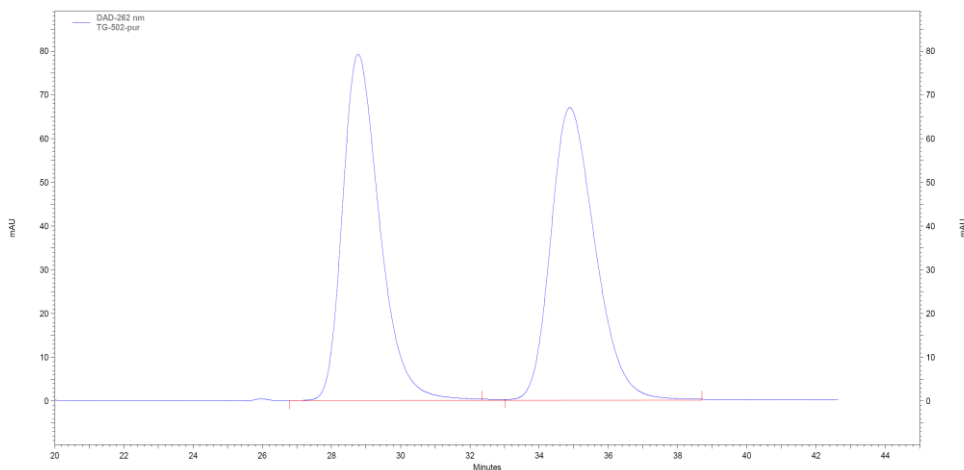

DAD-262 nm  
Results

| Pk # | Retention Time | Area Percent | Lambda Max |
|------|----------------|--------------|------------|
| 1    | 29,147         | 6,489        | 262        |
| 2    | 34,700         | 93,511       | 262        |

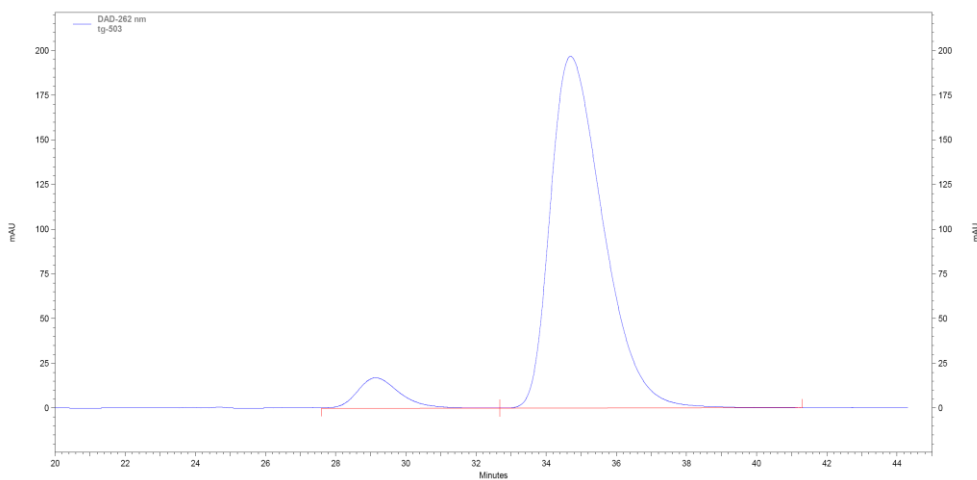

DAD-262 nm  
Results

| Pk # | Retention Time | Area Percent | Lambda Max |
|------|----------------|--------------|------------|
| 1    | 29,147         | 6,489        | 262        |
| 2    | 34,700         | 93,511       | 262        |

Supplementary figure 48. HPLC spectra for product **2dee**



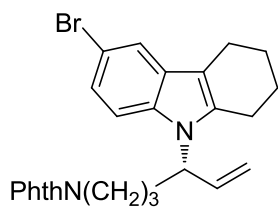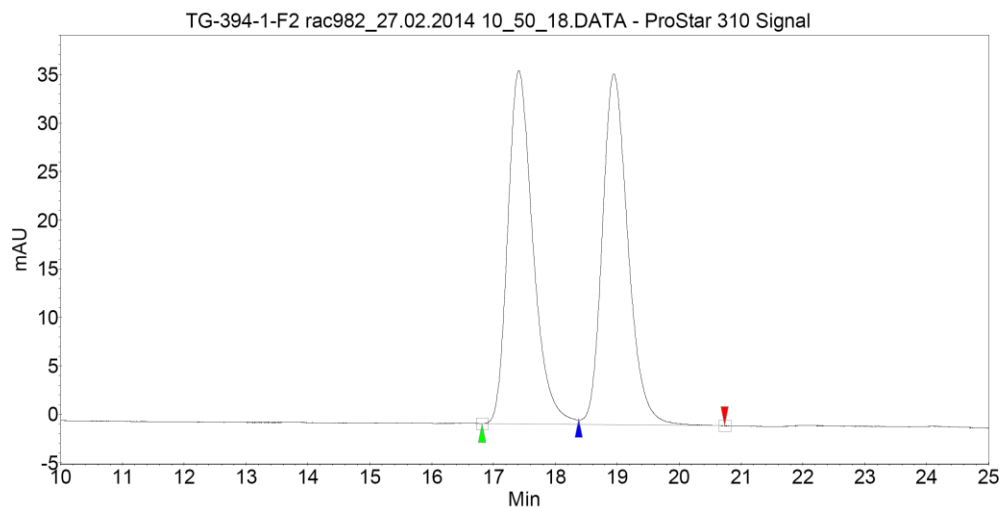

| Index | Name    | Time [Min] | Quantity [% Area] | Height [mAU] | Area [mAU.Min] | Area % [%] |
|-------|---------|------------|-------------------|--------------|----------------|------------|
| 1     | UNKNOWN | 17,41      | 49,67             | 36,4         | 17,1           | 49,674     |
| 2     | UNKNOWN | 18,94      | 50,33             | 36,1         | 17,4           | 50,326     |
| Total |         |            | 100,00            | 72,5         | 34,5           | 100,000    |

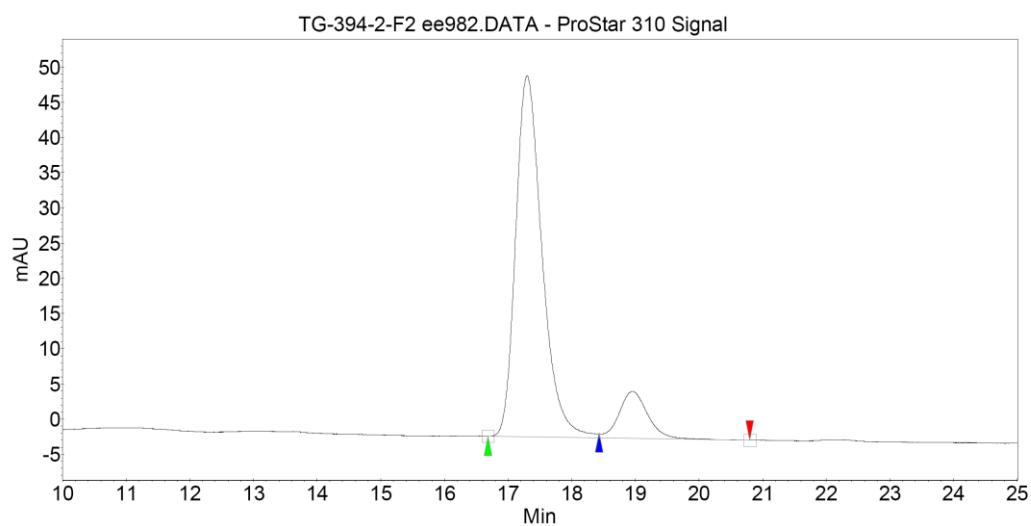

| Index | Name    | Time [Min] | Quantity [% Area] | Height [mAU] | Area [mAU.Min] | Area % [%] |
|-------|---------|------------|-------------------|--------------|----------------|------------|
| 1     | UNKNOWN | 17,30      | 87,66             | 51,3         | 24,6           | 87,655     |
| 2     | UNKNOWN | 18,95      | 12,34             | 6,7          | 3,5            | 12,345     |
| Total |         |            | 100,00            | 58,0         | 28,1           | 100,000    |

Supplementary figure 49. HPLC spectra for product 2e

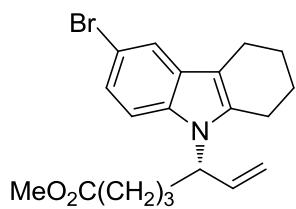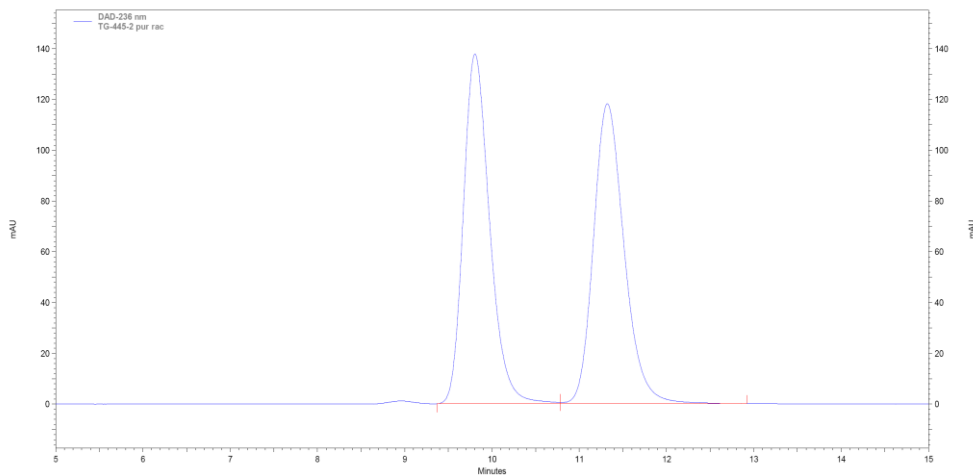

DAD-236 nm  
Results

| Pk # | Retention Time | Area Percent | Lambda Max |
|------|----------------|--------------|------------|
| 1    | 9,807          | 49,949       | 236        |
| 2    | 11,320         | 50,051       | 236        |

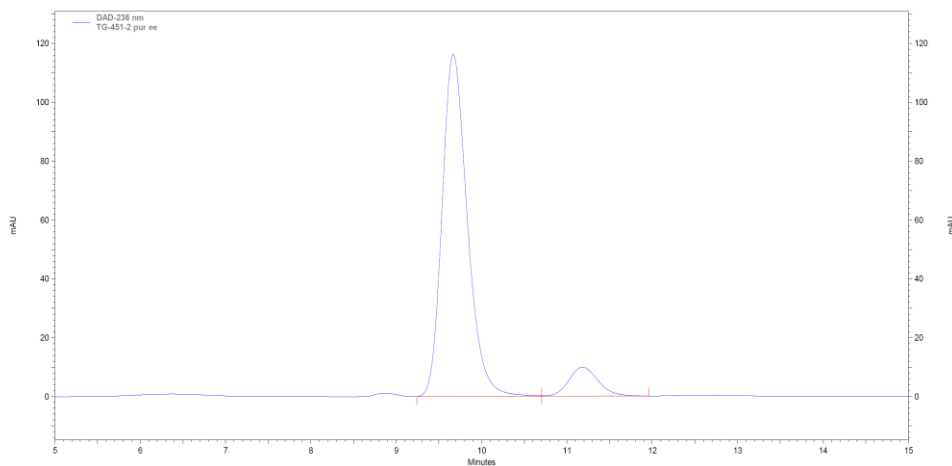

DAD-236 nm  
Results

| Pk # | Retention Time | Area Percent | Lambda Max |
|------|----------------|--------------|------------|
| 1    | 9,667          | 91,097       | 236        |
| 2    | 11,180         | 8,903        | 236        |

Supplementary figure 50. HPLC spectra for product **2f**

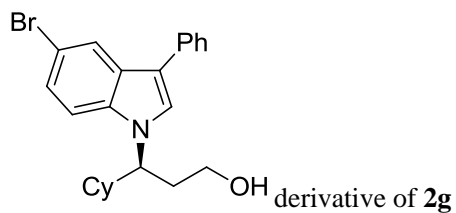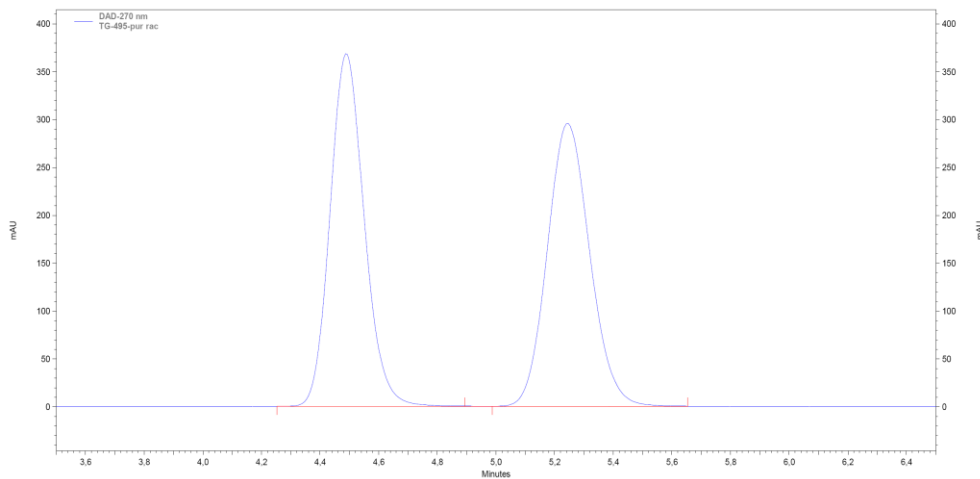

**DAD-270 nm  
Results**

| Pk # | Retention Time | Area Percent | Lambda Max |
|------|----------------|--------------|------------|
| 1    | 4,487          | 49,997       | 229        |
| 2    | 5,247          | 50,003       | 229        |

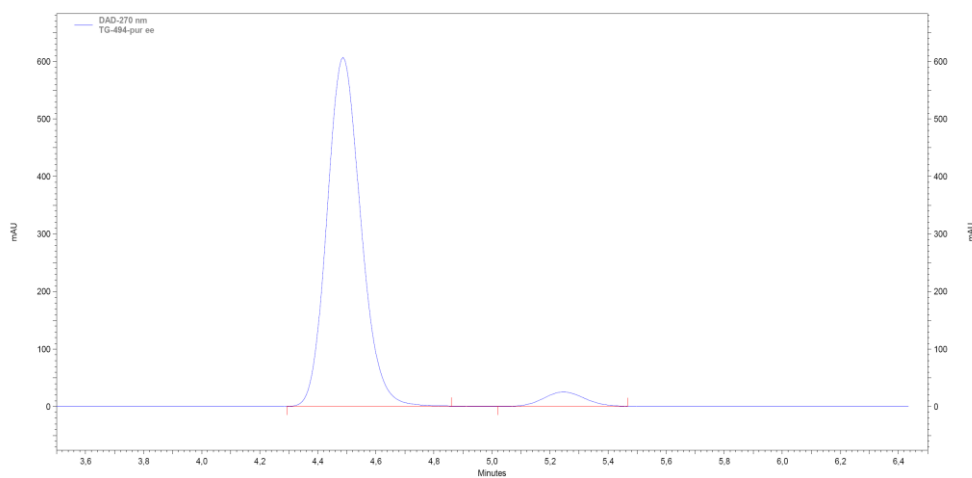

**DAD-270 nm  
Results**

| Pk # | Retention Time | Area Percent | Lambda Max |
|------|----------------|--------------|------------|
| 1    | 4,487          | 95,028       | 229        |
| 2    | 5,247          | 4,972        | 229        |

Supplementary figure 51. HPLC spectra for product **2gee**

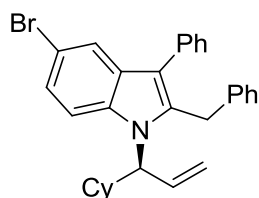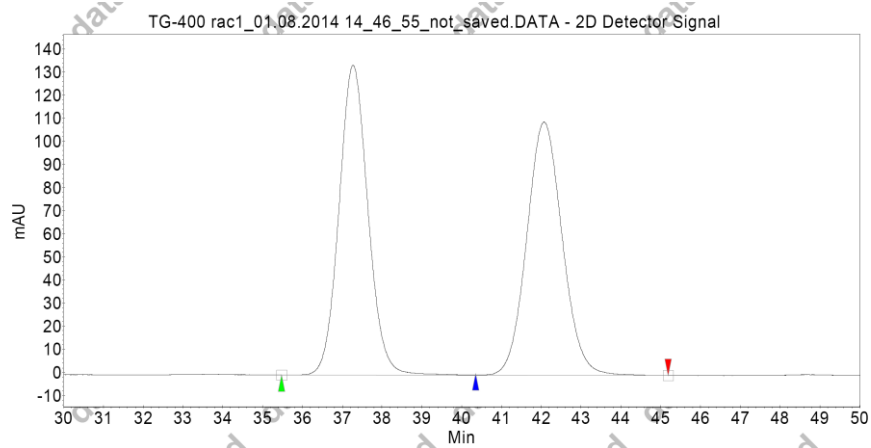

| Index | Name    | Time [Min] | Quantity [% Area] | Height [mAU] | Area [mAU.Min] | Area % [%] |
|-------|---------|------------|-------------------|--------------|----------------|------------|
| 1     | UNKNOWN | 37.27      | 49.96             | 134.1        | 113.5          | 49.957     |
| 2     | UNKNOWN | 42.07      | 50.04             | 109.7        | 113.7          | 50.043     |
| Total |         |            | 100.00            | 243.8        | 227.1          | 100.000    |

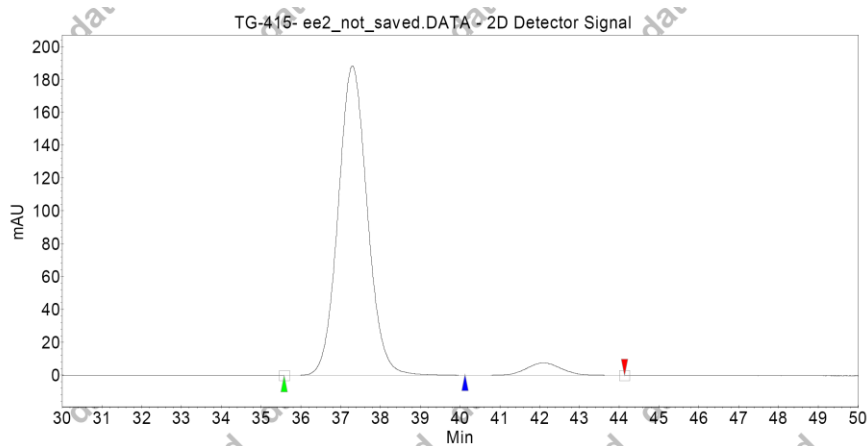

| Index | Name    | Time [Min] | Quantity [% Area] | Height [mAU] | Area [mAU.Min] | Area % [%] |
|-------|---------|------------|-------------------|--------------|----------------|------------|
| 1     | UNKNOWN | 37.29      | 95.26             | 188.6        | 160.1          | 95.262     |
| 2     | UNKNOWN | 42.09      | 4.74              | 7.7          | 8.0            | 4.738      |
| Total |         |            | 100.00            | 196.3        | 168.0          | 100.000    |

Supplementary figure 52. HPLC spectra for product 2h

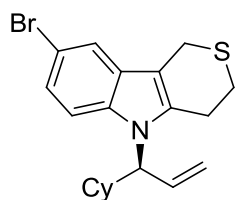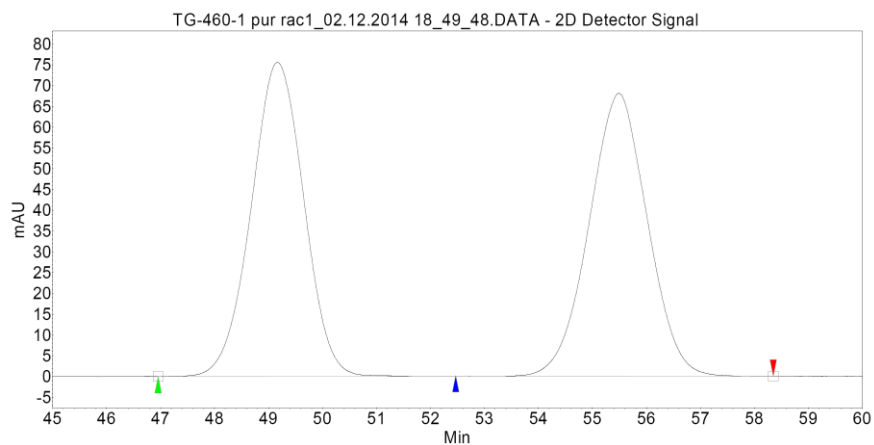

| Index | Name    | Time [Min] | Quantity [% Area] | Height [mAU] | Area [mAU.Min] | Area % [%] |
|-------|---------|------------|-------------------|--------------|----------------|------------|
| 1     | UNKNOWN | 49.16      | 50.05             | 75.5         | 85.5           | 50.052     |
| 2     | UNKNOWN | 55.49      | 49.95             | 68.1         | 85.3           | 49.948     |
| Total |         |            | 100.00            | 143.6        | 170.8          | 100.000    |

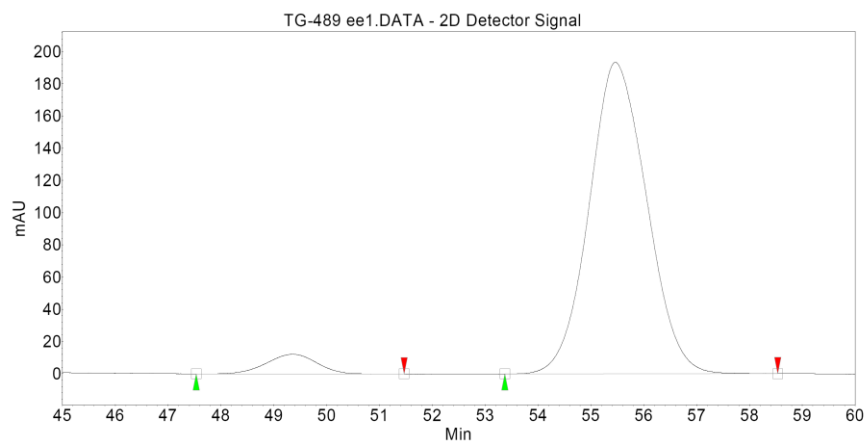

| Index | Name    | Time [Min] | Quantity [% Area] | Height [mAU] | Area [mAU.Min] | Area % [%] |
|-------|---------|------------|-------------------|--------------|----------------|------------|
| 1     | UNKNOWN | 49.36      | 5.21              | 12.2         | 13.4           | 5.214      |
| 2     | UNKNOWN | 55.45      | 94.79             | 193.4        | 243.9          | 94.786     |
| Total |         |            | 100.00            | 205.6        | 257.4          | 100.000    |

Supplementary figure 53. HPLC spectra for product 2i

**Supplementary Table 1.** Optimization of Rhodium Catalyzed Coupling of phenylhydrazine with Cyclohexylallene

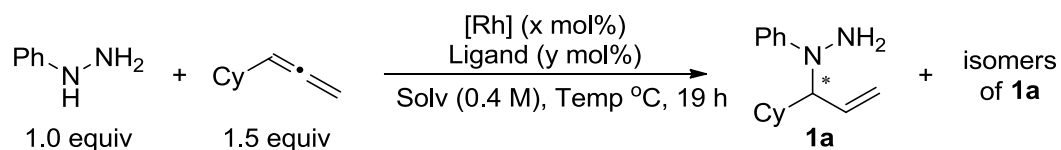

| Entries | [Rh] (x)                                     | Ligand (y)                     | Solv    | Temp | Isomers of 1a | yield <sup>a</sup> | ee <sup>b</sup> |
|---------|----------------------------------------------|--------------------------------|---------|------|---------------|--------------------|-----------------|
| 1       | [Rh(COD)Cl] <sub>2</sub> (1.25)              | ( <i>S,S</i> )-Chiraphos (5.0) | DCE     | 80   | n.d           | 28                 | 21              |
| 2       | [Rh(COD)Cl] <sub>2</sub> (1.25)              | ( <i>R</i> )-H8-Binap (5.0)    | DCE     | 80   | n.d           | 65                 | 53              |
| 3       | [Rh(COD)Cl] <sub>2</sub> (1.25)              | <b>L1</b> (5.0)                | DCE     | 50   | n.d           | 9                  | -               |
| 4       | [Rh(COD)Cl] <sub>2</sub> (1.25)              | <b>L1</b> (5.0)                | DCE     | 40   | n.d           | 0                  | -               |
| 5       | [Rh(COD) <sub>2</sub> ]BF <sub>4</sub> (2.5) | <b>L1</b> (5.0)                | DCE     | 80   | n.d           | 27                 | 64              |
| 6       | [Rh(nda)Cl] <sub>2</sub> (1.25)              | <b>L1</b> (5.0)                | DCE     | 80   | n.d           | 85                 | 80              |
| 7       | [Rh(ethylene)]acac<br>(2.5)                  | <b>L1</b> (5.0)                | DCE     | 80   | n.d           | 50                 | 81              |
| 8       | [Rh(COD)Cl] <sub>2</sub> (1.25)              | <b>L1</b> (5.0)                | THF     | 80   | n.d           | 0                  | -               |
| 9       | [Rh(COD)Cl] <sub>2</sub> (1.25)              | <b>L1</b> (5.0)                | toluene | 80   | n.d           | 0                  | -               |
| 10      | [Rh(COD)Cl] <sub>2</sub> (1.25)              | <b>L1</b> (2.5)                | DCE     | 80   | n.d           | 96                 | 79              |
| 11      | [Rh(COD)Cl] <sub>2</sub> (1.25)              | <b>L1</b> (7.5)                | DCE     | 80   | n.d           | 81                 | 82              |

<sup>a</sup> Isolated yield; <sup>b</sup> Determined by chiral HPLC.

## Supplementary Methods

### General Information

**FCC** (Flash Column Chromatography) was accomplished using MACHEREY-NAGEL silica gel 60<sup>®</sup> (230-400 mesh). **TLC** (Thin Layer Chromatography) was performed on aluminum plates pre-coated with silica gel (MERCK, 60F<sub>254</sub>), which were visualized by UV fluorescence ( $\lambda_{\text{max}} = 254 \text{ nm}$ ) and/or by staining with 1% w/v KMnO<sub>4</sub> in 0.5 M aqueous K<sub>2</sub>CO<sub>3</sub>. **NMR** (Nuclear Magnetic Resonance) spectra were acquired on a BRUKER Avance spectrometer (300, 400, or 500 MHz and 100.6 MHz for <sup>1</sup>H and <sup>13</sup>C respectively). All <sup>1</sup>H NMR spectra are reported in parts per million (ppm) downfield of TMS and were measured relative to the signals at 7.26 ppm (CHCl<sub>3</sub>) or 7.16 ppm (C<sub>6</sub>D<sub>6</sub>). All <sup>13</sup>C NMR spectra were reported in ppm relative to residual CHCl<sub>3</sub> (77.16 ppm) or C<sub>6</sub>D<sub>6</sub> (128.06 ppm) and were obtained with <sup>1</sup>H-decoupling. Data for <sup>1</sup>H NMR are described as following: chemical shift ( $\delta$  in ppm), multiplicity (s, singlet; d, doublet; t, triplet; q, quartet; quin, quintet; sx, sextet; m, multiplet; app, apparent; br, broad signal), coupling constant (Hz), integration. Data for <sup>13</sup>C NMR spectra are described in terms of chemical shift ( $\delta$  in ppm). **HRMS** (High resolution mass spectra) were obtained on a FINNIGAN MAT 8200 instrument (CI/NH<sub>3</sub>: 110 eV; EI: 70 eV). **Chiral HPLC** was performed on a MERCK HITACHI HPLC apparatus (pump: L-7100, UV detector: D-7400, oven: L-7360; columns: AD-H, AD-3, OD-3, OJ-H, L-C2, L-C3, AD-3R, OD-3R, OJ-R, and OJ-3R 15-25 cm 4.6 cm, DAICEL). The **Optical Rotation** of chiral compounds was determined on a PERKIN-ELMER PE 241 apparatus and transformed for a given temperature according to the following formula:

$$\text{Supplementary Equation 1: } [\alpha]_D^T = \frac{\alpha \cdot 100}{c \cdot d}$$

$\alpha$ : measured value for optical rotation;  $c$ : concentration in g/100 ml;  $d$ : length of the cuvette in dm;  $T$ : temperature in °C.

### Materials

1,2-Dichloroethane (DCE) was freshly distilled over CaH<sub>2</sub> and degassed by three Freeze-Pump-Thaw cycles prior to use. Solvents employed for work-up and column chromatography were purchased in technical grade quality and distilled by rotary evaporator before use. Aryl hydrazines, allenes, ketones and aldehydes, if commercially available, were purchased from Sigma-Aldrich, ABCR, Alfa Aesar and used without further purification. If the aryl hydrazines were obtained as their HCl salt form, the corresponding

aryl hydrazines were liberated according to the literature procedure.<sup>1</sup> Propa-1,2-dien-1-ylcycloheptane,<sup>2</sup> hexa-4,5-dien-1-ylbenzene,<sup>3</sup> 2-(hexa-4,5-dien-1-yl)isoindoline-1,3-dione,<sup>4</sup> methyl hepta-5,6-dienoate<sup>4</sup> and *tert*-butyl(hepta-5,6-dien-1-yloxy)dimethylsilane<sup>4</sup> were synthesized according to literatures. The ligands and [Rh(COD)Cl]<sub>2</sub> were purchased from Sigma-Aldrich, ABCR, Alfa Aesar and used without further purification.



## Synthesis and Characterization of *N*-Allylic Aryl Hydrazines (**1a-1**)

### **1** (*S*)-1-(1-cyclohexylallyl)-1-phenylhydrazine (**1a**)

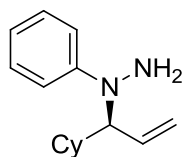

The reaction was performed with cyclohexylallene (109  $\mu$ l, 91.6 mg, 0.75 mmol) and phenylhydrazine (49.3  $\mu$ l, 54.1 mg, 0.5 mmol) using ligand **L1** at 80 °C. The crude product was purified by FCC on silica gel (EA/CH = 1/30,  $R_f$  = 0.29) to afford the product as a yellow oil (106.8 mg, 93 %).

$^1\text{H NMR}$  (300MHz,  $\text{CDCl}_3$ )  $\delta$  = 7.21 - 7.10 (m, 2 H), 6.88 (d,  $J$  = 8.1 Hz, 2 H), 6.65 (t,  $J$  = 7.3 Hz, 1 H), 5.73 (ddd,  $J$  = 17.6, 10.2, 7.8 Hz, 1 H), 4.14 - 5.92 (m, 2 H), 3.76 (m, 1 H), 1.87 - 1.52 (m, 6 H), 1.29 - 1.01 (m, 3 H), 0.98 - 0.79 (m, 2 H);  $^{13}\text{C NMR}$  (100.6MHz,  $\text{CDCl}_3$ )  $\delta$  = 152.2, 134.1, 128.9, 117.8, 117.6, 113.0, 68.4, 38.2, 30.5, 30.5, 26.6, 26.1, 26.0; **HRMS-APCI** (MeOH,  $m/z$ ):  $[\text{M}+\text{H}]^+$  calcd for  $\text{C}_{15}\text{H}_{23}\text{N}_2$ , 231.1861; found, 231.1849; **HPLC** (CHIRALCEL<sup>®</sup> AD-H, *n*-heptane / *i*PrOH = 90:10, 1 mL/min)  $t_R$  = 5.45 min (minor),  $t_R$  = 9.18 min (major), 85% *ee* (*S*);  $[\alpha]_D^{25}$  = + 79.00 ( $c$  = 1.360,  $\text{CDCl}_3$ ).

**Typical procedure for recrystallization** (recrystallization of **1a** with tosylic acid): To **1a** was added EtOH/Et<sub>2</sub>O and toluene sulfonic acid (1.0 equiv) and the solution was recrystallized at -20 °C to obtain the enantiomerically enriched product as a tosylic salt form. The solid was filtered off and washed with cold Et<sub>2</sub>O, then dissolved in dichloromethane before a solution of sodium hydroxide (25%) was added. The organic phase was separated after strong shaking, the water phase was extracted with dichloromethane (10 ml x 2). The combined organic phase was dried over magnesium sulfate, filtered and concentrated to give the enantiomerically enriched product (66.2 mg, 62% yield; 95% *ee*).

### **2** (*S*)-1-(1-cyclohexylallyl)-1-(*m*-tolyl)hydrazine (**1b**)

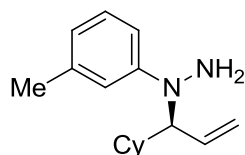

The reaction was performed with cyclohexylallene (218  $\mu$ l, 183.2 mg, 1.50 mmol) and *m*-tolylhydrazine (122.2 mg, 1.0 mmol) using ligand **L1** at 80 °C, the catalyst/ligand and solvent loading were also doubled accordingly. The crude product was purified by FCC on silica gel (EA/CH = 1/30,  $R_f$  = 0.29) to afford the product as a yellow oil (213.6 mg, 93 %).

**<sup>1</sup>H NMR** (400MHz, CDCl<sub>3</sub>) δ = 7.14 - 7.10 (m, 1 H), 6.80 - 6.75 (m, 2 H), 6.58 - 6.57 (m, 1 H), 5.81 (ddd, *J* = 17.5, 10.2, 7.7 Hz, 1 H), 5.20 - 5.16 (m, 1 H), 5.10 - 5.05 (m, 1 H), 3.85 - 3.80 (m, 1 H), 3.33 (br. s., 1 H), 2.32 (s, 3H), 1.88 - 1.66 (m, 6 H), 1.30 - 1.16 (m, 3 H), 1.02 - 0.94 (m, 2 H); **<sup>13</sup>C NMR** (100.6MHz, CDCl<sub>3</sub>) δ = 152.3, 138.7, 134.3, 128.8, 118.6, 117.8, 113.8, 110.3, 68.5, 38.3, 30.6, 30.6, 26.6, 26.2, 26.1, 21.9; **HRMS-APCI** (MeOH, *m/z*): [M+H]<sup>+</sup> calcd for C<sub>16</sub>H<sub>24</sub>N<sub>2</sub>, 245.3831; found, 245.2016. **HPLC** (CHIRALCEL<sup>®</sup> OJ-3, *n*-heptane / <sup>*i*</sup>PrOH = 97:3, 1 mL/min) *t<sub>R</sub>* = 7.41 min (minor), *t<sub>R</sub>* = 8.70 min (major), 77% *ee* (**S**); [α]<sub>D</sub><sup>25</sup> = +79.60 (c = 1.350, CDCl<sub>3</sub>).

Recrystallization of **1b** adapted the typical procedure using MeOH/H<sub>2</sub>O/Et<sub>2</sub>O to obtain the enantiomeric enrich product(110.9 mg, 59% yield; 99% *ee*).

### **3** (*S*)-1-(1-cyclohexylallyl)-1-(4-fluorophenyl)hydrazine (**1c**)

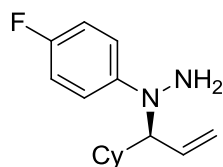

The reaction was performed with cyclohexylallene (218 μl, 183.2 mg, 1.50 mmol) and *p*-fluorophenylhydrazine (126.2 mg, 1.0 mmol) using ligand **L1** at 80 °C, the catalyst/ligand and solvent loading were also doubled accordingly. The crude product was purified by FCC on silica gel, (EA/CH = 1/14, *R<sub>f</sub>* = 0.32) to afford the product as a yellow oil (194.2 mg, 78 %).

**<sup>1</sup>H NMR** (400MHz, CDCl<sub>3</sub>) δ = 6.93 (s, 2 H), 6.92 (s, 2 H), 5.75 (ddd, *J* = 14.0, 8.4, 6.3 Hz, 1 H), 5.21 - 5.18 (m, 1 H), 5.05 - 5.01 (m, 1 H), 3.71 - 3.68 (m, 1 H), 3.36 (br. s., 1 H), 1.95 - 1.92 (m, 1 H), 1.82 - 1.74 (m, 4 H), 1.71 - 1.67 (m, 1 H), 1.32 - 1.14 (m, 3 H), 1.03 - 0.90 (m, 2 H); **<sup>13</sup>C NMR** (100.6MHz, CDCl<sub>3</sub>) δ = 156.1 (d, *J<sub>C-F</sub>* = 189.1 Hz), 148.8, 133.4, 118.5, 115.3, 115.1, 70.1, 38.2, 30.6, 26.6, 26.1, 26.1; **HRMS-ESI** (MeOH, *m/z*): [M+H]<sup>+</sup> calcd for C<sub>15</sub>H<sub>22</sub>N<sub>2</sub>F, 249.1767; found, 249.1768. **HPLC** (CHIRALCEL<sup>®</sup> OJ-H, *n*-heptane / <sup>*i*</sup>PrOH = 90:10, 1 mL/min) *t<sub>R</sub>* = 7.02 min (minor), *t<sub>R</sub>* = 7.98 min (major), 78% *ee* (**S**); [α]<sub>D</sub><sup>25</sup> = +62.60 (c = 0.800, CDCl<sub>3</sub>).

Recrystallization of **1c** adapted the typical procedure using MeOH/Et<sub>2</sub>O to obtain the enantiomeric enrich product(153.3 mg, 69% yield; 95% *ee*).

### **4** (*S*)-1-(4-chlorophenyl)-1-(1-cyclohexylallyl)hydrazine (**1d**)

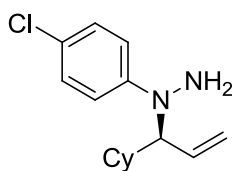

The reaction was performed with cyclohexylallene (109  $\mu$ l, 91.6 mg, 0.75 mmol), *p*-chlorophenylhydrazine (71.3 mg, 0.5 mmol), Rh(COD)Cl<sub>2</sub> (2 mol%) using ligand **L1** (8 mol%) at 80 °C. The crude product was purified by FCC on silica gel, (EA/CH = 1/14,  $R_f$  = 0.35) to afford the product as a yellow oil (89.6 mg, 87 %).

<sup>1</sup>H NMR (400MHz, CDCl<sub>3</sub>)  $\delta$  = 7.17 - 7.13 (m, 2 H), 6.92 - 6.88 (m, 2 H), 5.78 (ddd,  $J$  = 17.3, 10.5, 7.6 Hz, 1 H), 5.20 (ddd,  $J$  = 10.5, 1.7, 1.0 Hz, 1 H), 5.06 (ddd,  $J$  = 17.3, 1.7, 1.0 Hz, 1 H), 3.78 (m, 1 H), 3.14 (br. s., 1 H), 1.87 - 1.66 (m, 6 H), 1.32 - 1.13 (m, 3 H), 1.01 - 0.91 (m, 2 H); <sup>13</sup>C NMR (100.6MHz, CDCl<sub>3</sub>)  $\delta$  = 150.9, 133.7, 128.7, 122.4, 118.2, 114.5, 68.8, 38.3, 30.6, 30.6, 26.6, 26.1, 26.1; HRMS-ESI (MeOH,  $m/z$ ): [M+H]<sup>+</sup> calcd for C<sub>15</sub>H<sub>22</sub>N<sub>2</sub><sup>35</sup>Cl, 265.1471; found, 265.1474. HPLC (CHIRALCEL<sup>®</sup> AD-H, *n*-heptane / <sup>i</sup>PrOH = 80:20, 1 mL/min)  $t_R$  = 5.51 min (minor),  $t_R$  = 14.29 min (major), 91% *ee* (**S**);  $[\alpha]_D^{25}$  = + 69.90 ( $c$  = 1.030, CDCl<sub>3</sub>).

#### **5** (**S**)-1-(4-bromophenyl)-1-(1-cyclohexylallyl)hydrazine (**1e**)

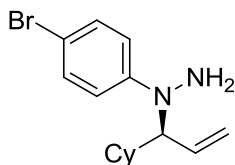

The reaction was performed with cyclohexylallene (109  $\mu$ l, 91.6 mg, 0.75 mmol) and *p*-bromophenylhydrazine (93.5 mg, 0.5 mmol) using ligand **L1** at 80 °C. The crude product was purified by FCC on silica gel, (EA/CH = 1/14,  $R_f$  = 0.37) to afford the product as a yellow oil (124.1 mg, 80 %).

<sup>1</sup>H NMR (400MHz, CDCl<sub>3</sub>)  $\delta$  = 7.30 - 7.26 (m, 2 H), 6.88 - 6.84 (m, 2 H), 5.78 (ddd,  $J$  = 17.4, 10.6, 7.6 Hz, 1 H), 5.20 (ddd,  $J$  = 10.6, 1.6, 0.9 Hz, 1 H), 5.06 (ddd,  $J$  = 17.4, 1.6, 0.9 Hz, 1 H), 3.81 - 3.77 (m, 1 H), 3.32 (br. s., 2 H), 1.86 - 1.66 (m, 6 H), 1.32 - 1.15 (m, 3 H), 1.01 - 0.90 (m, 2 H); <sup>13</sup>C NMR (100.6MHz, CDCl<sub>3</sub>)  $\delta$  = 151.3, 133.6, 131.6, 118.2, 114.9, 109.5, 68.6, 38.3, 30.6, 30.5, 26.6, 26.1, 26.0; HRMS-APCI (MeOH,  $m/z$ ): [M+H]<sup>+</sup> calcd for C<sub>15</sub>H<sub>22</sub><sup>79</sup>BrN<sub>2</sub>, 309.09663; found, 309.09670. HPLC (CHIRALCEL<sup>®</sup> AD-H, *n*-heptane / <sup>i</sup>PrOH = 80:20, 1 mL/min)  $t_R$  = 5.56 min (minor),  $t_R$  = 13.94 min (major), 91% *ee* (**S**);  $[\alpha]_D^{25}$  = +23.67 ( $c$  = 0.490, CHCl<sub>3</sub>).

The reaction using ligand **L2** under the same condition gave (*R*)-1-(4-bromophenyl)-1-(1-cyclohexylallyl)hydrazine (124.1 mg, 80 %). 91% *ee* (**R**);  $[\alpha]_D^{25} = -34.35$  ( $c = 0.46$ ,  $\text{CHCl}_3$ ).

**6** (*R*)-1-(1-cyclohexylallyl)-1-(4-(trifluoromethyl)phenyl)hydrazine (**1f**)

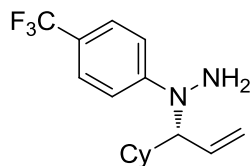

The reaction was performed with cyclohexylallene (109  $\mu\text{l}$ , 91.6 mg, 0.75 mmol) and *p*-trifluoromethylphenylhydrazine (88.1 mg, 0.5 mmol),  $\text{Rh}(\text{COD})\text{Cl}_2$  (2 mol%) using ligand **L2** (8 mol%) at 80 °C. The crude product was purified by FCC on silica gel (EA/CH = 1/29,  $R_f = 0.23$ ) to afford the product as a yellow oil (101.4 mg, 68 %).

$^1\text{H NMR}$  (400MHz,  $\text{CDCl}_3$ )  $\delta = 7.46 - 7.42$  (m, 2 H), 7.04 - 7.00 (m, 2 H), 5.84 (ddd,  $J = 17.5, 10.5, 7.4$  Hz, 1 H), 5.23 (ddd,  $J = 10.5, 1.5, 0.9$  Hz, 1 H), 5.12 (ddd,  $J = 17.5, 1.5, 0.9$  Hz, 1 H), 3.95 (ddt,  $J = 9.6, 7.4, 0.9$  Hz, 1 H), 3.45 (br. s., 2 H), 1.87 - 1.68 (m, 6 H), 1.31 - 1.16 (m, 3 H), 1.05 - 0.93 (m, 2 H);  $^{13}\text{C NMR}$  (100.6MHz,  $\text{CDCl}_3$ )  $\delta = 154.3, 133.7, 126.3$  (q,  $J_{\text{C-F}} = 3.8$  Hz), 125.0 (q,  $J_{\text{C-F}} = 270.6$  Hz), 118.7 (d,  $J_{\text{C-F}} = 32.2$  Hz), 118.2, 111.7, 67.6, 38.3, 30.5, 26.5, 26.1, 26.0; **HRMS-APCI** (MeOH,  $m/z$ ):  $[\text{M}+\text{H}]^+$  calcd for  $\text{C}_{16}\text{H}_{22}\text{N}_2\text{F}_3$ , 299.1735; found, 299.1732. **HPLC** (CHIRALCEL<sup>®</sup> AD-H, *n*-heptane / *i*PrOH = 85:15, 1 mL/min)  $t_R = 5.46$  min (major),  $t_R = 9.96$  min (minor), 85% *ee* (**R**);  $[\alpha]_D^{25} = -64.40$  ( $c = 1.000$ ,  $\text{CHCl}_3$ ).

**7** (*S*)-1-(1-cyclohexylallyl)-1-(2,5-difluorophenyl)hydrazine (**1g**)

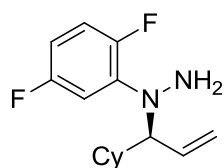

The reaction was performed with cyclohexylallene (109  $\mu\text{l}$ , 91.6 mg, 0.75 mmol) and 2,5-difluorophenylhydrazine (72.1 mg, 0.5 mmol) using ligand **L1** at 100 °C. The crude product was purified by FCC on silica gel (EA/CH = 1/14,  $R_f = 0.29$ ) to afford the product as a yellow oil (92.8 mg, 70 %).

$^1\text{H NMR}$  (400MHz,  $\text{CDCl}_3$ )  $\delta = 6.95 - 6.86$  (m, 2 H), 6.53 - 6.47 (m, 1 H), 5.76 (dddd,  $J = 17.4, 10.4, 8.1$  Hz,  $J_{\text{F-H}} = 1.6$  Hz, 1 H), 5.22 (ddd,  $J = 10.4, 1.7, 0.6$  Hz, 1 H), 4.98 (ddd,  $J = 17.4, 1.7, 0.9$  Hz, 1 H), 3.70 - 3.65 (m, 1 H), 3.33 (br. s., 1 H), 2.07 - 2.00 (m, 1 H), 1.84 - 1.65 (m, 5 H), 1.33 - 1.07 (m, 4 H), 0.98 -

0.87 (m, 1 H);  $^{13}\text{C}$  NMR (100.6MHz,  $\text{CDCl}_3$ )  $\delta$  = 158.9 (dd,  $J_{\text{C-F}}$  = 240.4, 1.9 Hz), 149.3 (dd,  $J_{\text{C-F}}$  = 239.0, 2.7 Hz), 142.4 (t,  $J_{\text{C-F}}$  = 9.4 Hz), 133.4, 119.4, 116.4 (dd,  $J_{\text{C-F}}$  = 24.4, 10.0 Hz), 107.1 (dd,  $J_{\text{C-F}}$  = 27.3, 3.3 Hz), 106.9 (dd,  $J_{\text{C-F}}$  = 24.4, 8.2 Hz), 71.2 (d,  $J_{\text{C-F}}$  = 7.2 Hz), 38.1, 30.5, 30.1, 26.6, 26.2, 26.1;  $^{19}\text{F}$  NMR (235.3MHz,  $\text{CDCl}_3$ )  $\delta$  = -118.18 (dddd,  $J$  = 16.1, 10.9, 7.3, 5.4 Hz, 1 F), -127.16 (m, 1 F); **HRMS-APCI** (MeOH,  $m/z$ ):  $[\text{M}+\text{H}]^+$  calcd for  $\text{C}_{15}\text{H}_{21}\text{N}_2\text{F}_2$ , 267.1673; found, 267.1671. **HPLC** (CHIRALCEL<sup>®</sup> OJ-H, *n*-heptane / *i*PrOH = 97:3, 1 mL/min)  $t_R$  = 6.48 min (major),  $t_R$  = 7.88 min (minor), 85% *ee* (**S**);  $[\alpha]_D^{25}$  = -6.20 ( $c$  = 0.970,  $\text{CHCl}_3$ ).

**8** (*R*)-1-(4-bromophenyl)-1-(1-cycloheptylallyl)hydrazine (**1h**)

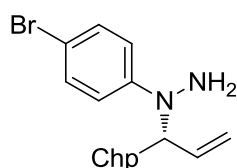

The reaction was performed with cycloheptylallene (117  $\mu\text{l}$ , 102.2 mg, 0.75 mmol) and 4-bromophenylhydrazine (94 mg, 0.5 mmol) using ligand **L2** at 80 °C. The crude product was purified by FCC on silica gel (EA/CH = 1/30,  $R_f$  = 0.31) to afford the product as a yellow oil (133.8 mg, 83 %).

$^1\text{H}$  NMR (400MHz,  $\text{CDCl}_3$ )  $\delta$  = 7.31 - 7.27 (m, 2 H), 6.89 - 6.85 (m, 2 H), 5.77 (ddd,  $J$  = 17.4, 10.5, 7.6 Hz, 1 H), 5.20 (ddd,  $J$  = 10.5, 1.6, 0.9 Hz, 1 H), 5.06 (ddd,  $J$  = 17.4, 1.6, 0.9 Hz, 1 H), 3.82 (dd,  $J$  = 10.5, 7.6 Hz, 1 H), 3.30 (br. s., 2 H), 2.06 - 1.97 (m, 1 H), 1.87 - 1.76 (m, 2 H), 1.73 - 1.41 (m, 8 H), 1.33 - 1.18 (m, 2 H);  $^{13}\text{C}$  NMR (100.6MHz,  $\text{CDCl}_3$ )  $\delta$  = 151.2, 134.1, 131.6, 118.2, 114.9, 109.5, 68.1, 39.5, 31.4, 30.6, 28.7, 28.5, 26.6, 26.6; **HRMS-APCI** (MeOH,  $m/z$ ):  $[\text{M}+\text{H}]^+$  calcd for  $\text{C}_{16}\text{H}_{24}^{79}\text{BrN}_2$ , 323.1117; found, 323.1118. **HPLC** (CHIRALCEL<sup>®</sup> AD-3, *n*-heptane / *i*PrOH = 90:10, 1 mL/min)  $t_R$  = 4.10 min (major),  $t_R$  = 10.71 min (minor), 88% *ee* (**R**);  $[\alpha]_D^{25}$  = -44.60 ( $c$  = 1.000,  $\text{CHCl}_3$ ).

**9** (*S*)-1-(4-bromophenyl)-1-(6-phenylhex-1-en-3-yl)hydrazine (**1i**)

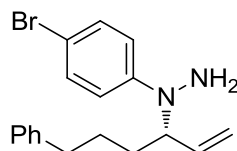

The reaction was performed with penta-3,4-dien-1-ylbenzene (128  $\mu\text{l}$ , 118.7 mg, 0.75 mmol) and 4-bromophenylhydrazine (94 mg, 0.5 mmol) using ligand **L2** at 80 °C. The crude product was purified by FCC on silica gel (EA/CH = 1/14,  $R_f$  = 0.21) to afford the product as a yellow oil (159 mg, 92 %).

**<sup>1</sup>H NMR** (400MHz, CDCl<sub>3</sub>) δ = 7.32 - 7.26 (m, 4 H), 7.21 - 7.15 (m, 3 H), 6.94 - 6.90 (m, 2 H), 5.74 (ddd, *J* = 17.4, 10.6, 5.8 Hz, 1 H), 5.21 (ddd, *J* = 10.6, 1.4, 1.4 Hz, 1 H), 5.10 (ddd, *J* = 17.4, 1.4, 1.4 Hz, 1 H), 4.23 - 4.19 (m, 1 H), 3.46 (br. s., 2 H), 2.72 - 2.60 (m, 2 H), 1.87 - 1.65 (m, 4 H); **<sup>13</sup>C NMR** (100.6MHz, CDCl<sub>3</sub>) δ = 142.1, 134.9, 131.7, 128.4, 125.9, 117.7, 115.8, 62.3, 35.7, 29.9, 28.1; **HRMS-APCI** (MeOH, *m/z*): [M+H]<sup>+</sup> calcd for C<sub>18</sub>H<sub>21</sub><sup>79</sup>BrN<sub>2</sub>, 345.0966; found, 345.0968. **HPLC** (CHIRALCEL<sup>®</sup> OJ-H, *n*-heptane / <sup>*i*</sup>PrOH = 80:20, 1 mL/min) *t<sub>R</sub>* = 19.73 min (minor), *t<sub>R</sub>* = 36.72 min (major), 85% *ee* (**S**); [α]<sub>D</sub><sup>25</sup> = - 41.70 (*c* = 1.240, CDCl<sub>3</sub>).

**10** (**S**)-2-(4-(1-(4-bromophenyl)hydrazinyl)hex-5-en-1-yl)isoindoline-1,3-dione (**1j**)

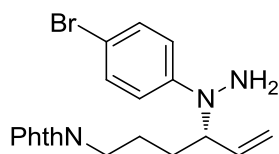

The reaction was performed with 2-(hexa-4,5-dien-1-yl)isoindoline-1,3-dione (170.0 mg, 0.75 mmol) and 4-bromophenylhydrazine (94 mg, 0.5 mmol) using ligand **L2** at 80 °C. The crude product was purified by FCC on silica gel (EA/CH = 2/8, *R<sub>f</sub>* = 0.14) to afford the product as a yellow oil (192.6 mg, 93 %).

**<sup>1</sup>H NMR** (500MHz, CDCl<sub>3</sub>) δ = 7.83 (dd, *J* = 5.4, 3.0 Hz, 2 H), 7.71 (dd, *J* = 5.4, 3.0 Hz, 2 H), 7.29 - 7.26 (m, 2 H), 6.92 - 6.89 (m, 2 H), 5.73 (ddd, *J* = 17.3, 10.6, 5.9 Hz, 1 H), 5.20 (ddd, *J* = 10.6, 1.2, 1.2 Hz, 1 H), 5.11 (ddd, *J* = 17.3, 1.2, 1.2 Hz, 1 H), 4.29 - 4.25 (m, 1 H), 3.74 (t, *J* = 7.0 Hz, 2 H), 3.30 (br. s., 2 H), 1.93 - 1.64 (m, 4 H); **<sup>13</sup>C NMR** (100.6MHz, CDCl<sub>3</sub>) δ = 168.4, 150.9, 134.7, 133.9, 132.0, 131.7, 123.2, 117.7, 115.4, 110.2, 61.7, 37.7, 27.8, 25.5; **HRMS-APCI** (MeOH, *m/z*): [M+H]<sup>+</sup> calcd for C<sub>20</sub>H<sub>21</sub><sup>79</sup>BrN<sub>3</sub>O<sub>2</sub>, 414.0817; found, 414.0815. **HPLC** (CHIRALCEL<sup>®</sup> AD-H, *n*-heptane / <sup>*i*</sup>PrOH = 80:20, 1 mL/min) *t<sub>R</sub>* = 16.65 min (major), *t<sub>R</sub>* = 26.20 min (minor), 79% *ee* (**S**); [α]<sub>D</sub><sup>25</sup> = - 29.40 (*c* = 1.010, CHCl<sub>3</sub>).

**11** (**S**)-methyl 5-(1-(4-bromophenyl)hydrazinyl)hept-6-enoate (**1k**)

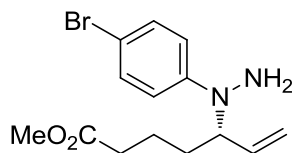

The reaction was performed with hepta-5,6-dienoic acid methyl ester (105.1 mg, 0.75 mmol) and 4-bromophenylhydrazine (94 mg, 0.5 mmol) using ligand **L2** at 80 °C. The crude product was purified by FCC on silica gel (EA/CH = 1/30, *R<sub>f</sub>* = 0.31) to afford the product as a yellow oil (140.6 mg, 86 %).

$^1\text{H NMR}$  (400MHz,  $\text{CDCl}_3$ )  $\delta$  = 7.32 - 7.28 (m, 2 H), 6.94 - 6.90 (m, 2 H), 5.74 (ddd,  $J$  = 17.5, 10.6, 5.6 Hz, 1 H), 5.22 (dt,  $J$  = 10.6, 1.1 Hz, 1 H), 5.08 (dt,  $J$  = 17.5, 1.1 Hz, 1 H), 4.25 - 4.19 (m, 1 H), 3.67 (s, 3 H), 3.34 (br. s., 2 H), 2.43 - 2.31 (m, 2 H), 1.91 - 1.60 (m, 4 H);  $^{13}\text{C NMR}$  (100.6MHz,  $\text{CDCl}_3$ )  $\delta$  = 173.9, 151.0, 134.7, 131.7, 117.5, 115.4, 110.0, 61.7, 51.5, 33.5, 29.9, 21.7; **HRMS-APCI** (MeOH,  $m/z$ ):  $[\text{M}+\text{H}]^+$  calcd for  $\text{C}_{14}\text{H}_{20}^{79}\text{BrN}_2\text{O}_2$ , 327.0708; found, 327.0710. **HPLC** (CHIRALCEL<sup>®</sup> L-C2, *n*-heptane / *i*PrOH = 95:5, 1 mL/min)  $t_R$  = 15.31 min (major),  $t_R$  = 18.88 min (minor), 84% *ee* (*S*);  $[\alpha]_D^{25}$  = - 47.50 ( $c$  = 1.060,  $\text{CHCl}_3$ ).

**12** (*S*)-1-(4-bromophenyl)-1-(7-((*tert*-butyldimethylsilyl)oxy)hept-1-en-3-yl)hydrazine (**11**)

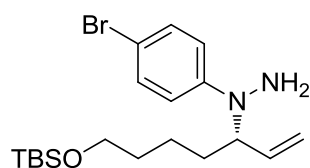

The reaction was performed with *tert*-butyldimethyl(hepta-5,6-dien-1-yloxy)silane (169.8 mg, 0.75 mmol) and 4-bromophenylhydrazine (94 mg, 0.5 mmol) using ligand **L2** at 80 °C. The crude product was purified by FCC on silica gel (EA/CH = 1/15,  $R_f$  = 0.22) to afford the product as a yellow oil (154.8 mg, 75 %).

$^1\text{H NMR}$  (500MHz,  $\text{CDCl}_3$ )  $\delta$  = 7.31 - 7.28 (m, 2 H), 6.94 - 6.91 (m, 2 H), 5.76 (ddd,  $J$  = 17.4, 10.6, 5.6 Hz, 1 H), 5.22 (dt,  $J$  = 10.6, 1.3 Hz, 1 H), 5.12 (dt,  $J$  = 17.4, 1.3 Hz, 1 H), 4.25 - 4.20 (m, 1 H), 3.62 (t,  $J$  = 6.4 Hz, 2 H), 3.29 (br. s., 2 H), 1.86 - 1.79 (m, 1 H), 1.71 - 1.63 (m, 1 H), 1.60 - 1.52 (m, 2 H), 1.47 - 1.34 (m, 2 H), 0.89 (s, 9 H), 0.04 (s, 6 H);  $^{13}\text{C NMR}$  (125.8MHz,  $\text{CDCl}_3$ )  $\delta$  = 151.0, 135.1, 131.6, 117.3, 115.3, 109.8, 62.9, 61.9, 32.6, 30.1, 25.9, 22.7, 18.3, -5.3; **HRMS-APCI** (MeOH,  $m/z$ ):  $[\text{M}+\text{H}]^+$  calcd for  $\text{C}_{19}\text{H}_{34}^{79}\text{BrN}_2\text{OSi}$ , 413.1618; found, 413.1619. **HPLC** (CHIRALCEL<sup>®</sup> OD-3, *n*-heptane / *i*PrOH = 95:5, 1 mL/min)  $t_R$  = 3.20 min (minor),  $t_R$  = 3.77 min (major), 83% *ee* (*S*);  $[\alpha]_D^{25}$  = - 33.30 ( $c$  = 1.040,  $\text{CHCl}_3$ ).

**Determination of absolute configuration**

Absolute configuration was determined by comparing the specific rotation the  $\text{NH}_2$ -cleaved<sup>5</sup> products with literature.<sup>6</sup> Cleavage of the N-N bond of both **1e** and (*R*)-1-(4-bromophenyl)-1-(1-cyclohexylallyl)hydrazine gave the corresponding aniline derivatives **1ea**. (*S*)-4-bromo-*N*-(1-cyclohexylallyl)aniline (**1ea**):  $[\alpha]_D^{25}$  = -3.08 ( $c$  = 0.455,  $\text{CHCl}_3$ ). Literature value of (*S*)-4-bromo-*N*-(1-cyclohexylallyl)aniline: 90% *ee*,  $[\alpha]_D^{25}$  = - 4.2 ( $c$  = 0.356,  $\text{CHCl}_3$ ). The absolute

configurations for other allylation products (allylic arylhydrazines and allylic indoles) were assigned by analogy.

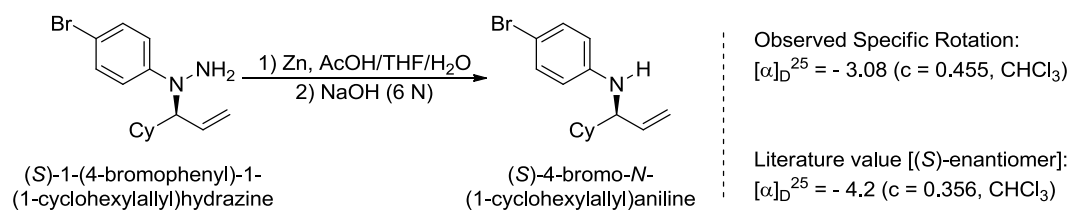



## Synthesis and Characterization of *N*-Allylic Indoles (2a-i)

### 1 (*S*)-9-(1-cyclohexylallyl)-2,3,4,9-tetrahydro-1*H*-carbazole (2a)

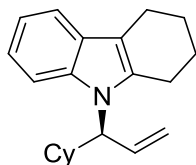

To the crude reaction mixture of **1a** was added cyclohexanone (57  $\mu$ L, 54 mg, 0.55 mmol). The indolization was proceeded for 3 h at 70  $^{\circ}$ C. The crude product was purified by FCC on silica gel (CH,  $R_f$  = 0.36) to afford the product as a white solid (122.2 mg, 87 %).

$^1\text{H NMR}$  (300MHz,  $\text{CDCl}_3$ )  $\delta$  = 7.55 - 7.52 (m, 1 H), 7.43 - 7.40 (m, 1 H), 7.19 - 7.09 (m, 2 H), 6.37 (ddd,  $J$  = 17.1, 10.3, 7.1 Hz, 1 H), 5.22 (dt,  $J$  = 10.3, 1.3 Hz, 1 H), 5.10 (dt,  $J$  = 17.1, 1.3 Hz, 1 H), 4.41 (dd,  $J$  = 10.3, 7.1 Hz, 1 H), 2.87 - 2.75 (m, 4 H), 2.33 - 2.20 (m, 1 H), 2.13 - 2.09 (m, 1 H), 2.05 - 1.86 (m, 5 H), 1.75 - 1.61 (m, 2 H), 1.45 - 1.31 (m, 1 H), 1.28 - 1.02 (m, 4 H), 0.89 - 0.76 (m, 1 H);  $^{13}\text{C NMR}$  (100.6MHz,  $\text{CDCl}_3$ )  $\delta$  = 135.5, 135.5, 135.2, 127.9, 120.1, 118.3, 117.7, 117.6, 110.9, 109.4, 63.7, 40.0, 31.5, 29.9, 26.0, 25.9, 23.6, 23.6, 23.1, 21.1; **HRMS-APCI** (MeOH,  $m/z$ ):  $[\text{M}+\text{H}]^+$  calcd for  $\text{C}_{21}\text{H}_{28}\text{N}$ , 294.2222; found, 294.2222. **m.p.**: 67 - 68  $^{\circ}$ C; **HPLC** (CHIRALCEL<sup>®</sup> OD-3R, MeCN /  $\text{H}_2\text{O}$  = 70:30, 1 mL/min)  $t_R$  = 36.03 min (major),  $t_R$  = 38.86 min (minor), 82% *ee* (*S*);  $[\alpha]_D^{25}$  = - 55.30 ( $c$  = 0.975,  $\text{CHCl}_3$ ).

### 2 (*S*)-9-(1-cyclohexylallyl)-6-fluoro-2,3,4,9-tetrahydro-1*H*-carbazole (2b)

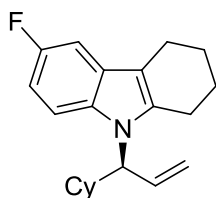

To the crude reaction mixture of **1c** was added cyclohexanone (57  $\mu$ L, 54 mg, 0.55 mmol). The indolization was proceeded for 18 h at 70  $^{\circ}$ C. The crude product was purified by FCC on silica gel (CH,  $R_f$  = 0.45) to afford the product as a yellowish oil (141.0 mg, 90 %).

$^1\text{H NMR}$  (400MHz,  $\text{CDCl}_3$ )  $\delta$  = 7.28 (ddd,  $J$  = 9.1, 0.3 Hz,  $J_{H-F}$  = 4.3 Hz, 1 H), 7.15 (ddd,  $J$  = 2.6, 0.3 Hz,  $J_{H-F}$  = 9.5 Hz, 1 H), 6.87 (ddd,  $J$  = 9.1, 2.6 Hz,  $J_{H-F}$  = 9.1 Hz, 1 H), 6.31 (ddd,  $J$  = 17.1, 10.3, 7.0 Hz, 1 H), 5.22 (dt,  $J$  = 10.3, 1.4 Hz, 1 H), 5.07 (dt,  $J$  = 17.1, 1.4 Hz, 1 H), 4.38 - 4.34 (m, 1 H), 2.80 - 2.68 (m, 4 H), 2.25 - 2.15 (m, 1 H), 2.12 - 2.04 (m, 1 H), 2.01 - 1.95 (m, 2 H), 1.92 - 1.83 (m, 3 H), 1.74 - 1.67 (m, 1 H), 1.66 - 1.59 (m, 1 H), 1.41 - 1.29 (m, 1 H), 1.25 - 1.01 (m, 4 H), 0.84 - 0.74 (m, 1 H);  $^{13}\text{C NMR}$  (100.6MHz,

CDCl<sub>3</sub>)  $\delta$  = 157.4 (d,  $J_{C-F}$  = 233.5 Hz), 137.4, 135.3, 131.7, 128.3 (d,  $J_{C-F}$  = 9.1 Hz), 117.7, 111.3 (d,  $J_{C-F}$  = 9.1 Hz), 109.5 (d,  $J_{C-F}$  = 4.0 Hz), 108.0 (d,  $J_{C-F}$  = 25.2 Hz), 102.7 (d,  $J_{C-F}$  = 23.1 Hz), 63.7, 40.1, 31.5, 29.9, 26.3, 26.0, 25.8, 23.6, 23.5, 23.0, 21.1; **HRMS-APCI** (MeOH, m/z): [M+H]<sup>+</sup> calcd for C<sub>21</sub>H<sub>27</sub>FN, 312.2127; found, 312.2129. **HPLC** (CHIRALCEL<sup>®</sup> AD-3R, MeCN / H<sub>2</sub>O = 65:35, 0.5 mL/min)  $t_R$  = 31.61 min (major),  $t_R$  = 35.24 min (minor), 85% *ee* (*S*);  $[\alpha]_D^{25}$  = - 61.55 (c = 1.035, CHCl<sub>3</sub>).

**3** (*S*)-6-bromo-9-(1-cyclohexylallyl)-2,3,4,9-tetrahydro-1*H*-carbazole (**2c**)

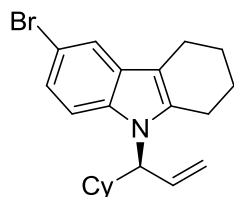

To the crude reaction mixture of **1e** was added cyclohexanone (57  $\mu$ L, 54 mg, 0.55 mmol). The indolization was proceeded for 18 h at 70 °C. The crude product was purified by FCC on silica gel (CH,  $R_f$  = 0.38) to afford the product as a yellowish oil (123.0 mg, 72 %).

**<sup>1</sup>H NMR** (400MHz, CDCl<sub>3</sub>)  $\delta$  = 7.57 (s, 1 H), 7.20 - 7.13 (m, 2 H), 6.25 (ddd,  $J$  = 17.1, 10.4, 6.9 Hz, 1 H), 5.18 (dd,  $J$  = 10.4, 1.0 Hz, 1 H), 5.00 (dd,  $J$  = 17.1, 1.0 Hz, 1 H), 4.31 (dd,  $J$  = 10.4, 6.9 Hz, 1 H), 2.76 - 2.63 (m, 4 H), 2.19 - 2.09 (m, 1 H), 2.05 - 2.02 (m, 1 H), 1.96 - 1.90 (m, 2 H), 1.87 - 1.80 (m, 3 H), 1.68 - 1.65 (m, 1 H), 1.59 - 1.55 (m, 1 H), 1.35 - 1.24 (m, 1 H), 1.19 - 0.96 (m, 4 H), 0.78 - 0.68 (m, 1 H); **<sup>13</sup>C NMR** (100.6MHz, CDCl<sub>3</sub>)  $\delta$  = 137.0, 135.1, 133.8, 129.7, 122.7, 120.4, 117.8, 112.3, 111.7, 109.2, 63.6, 40.1, 31.5, 29.9, 26.3, 26.0, 25.8, 23.5, 23.4, 23.0, 21.0; **HRMS-APCI** (MeOH, m/z): [M+H]<sup>+</sup> calcd for C<sub>21</sub>H<sub>27</sub>BrN, 372.1327; found, 372.1321.  $[\alpha]_D^{25}$  = - 53.06 (c = 0.965, CHCl<sub>3</sub>).

The *ee* value of **2c** was measured via its derivative **2cee**, which was derived from **2c** according to the literature procedure via debromination with <sup>t</sup>BuLi and MeOH.<sup>7</sup> The NMR data of **2cee** is consistent with **2a**. **HPLC** (CHIRALCEL<sup>®</sup> OD-3R, MeCN / H<sub>2</sub>O = 70:30, 0.5 mL/min)  $t_R$  = 27.96 min (major),  $t_R$  = 30.00 min (minor), 89% *ee* (*S*);  $[\alpha]_D^{25}$  = - 59.85 (c = 0.660, CHCl<sub>3</sub>).

**4** (*R*)-6-bromo-9-(1-cycloheptylallyl)-2,3,4,9-tetrahydro-1*H*-carbazole (**2d**)

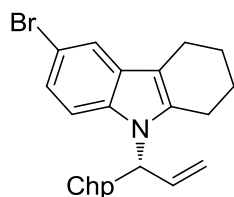

To the crude reaction mixture of **1h** was added cyclohexanone (57  $\mu$ L, 54 mg, 0.55 mmol). The indolization was proceeded for 18 h at 70  $^{\circ}$ C. The crude product was purified by FCC on silica gel (CH,  $R_f$  = 0.42) to afford the product as a yellowish oil (146.7 mg, 76 %).

**$^1$ H NMR** (400MHz,  $\text{CDCl}_3$ )  $\delta$  = 7.59 (dd,  $J$  = 1.9, 0.5 Hz, 1 H), 7.23 (dd,  $J$  = 8.7, 0.5 Hz, 1 H), 7.17 (dd,  $J$  = 8.7, 1.9 Hz, 1 H), 6.26 (ddd,  $J$  = 17.1, 10.2, 7.1 Hz, 1 H), 5.19 (dt,  $J$  = 10.2, 1.3 Hz, 1 H), 5.04 (dt,  $J$  = 17.1, 1.3 Hz, 1 H), 4.37 (ddt,  $J$  = 11.0, 7.1, 1.3, Hz, 1 H), 2.77 - 2.66 (m, 4 H), 2.46 - 2.36 (m, 1 H), 2.04 - 1.92 (m, 3 H), 1.89 - 1.83 (m, 2 H), 1.80 - 1.72 (m, 1 H), 1.66 - 1.46 (m, 6 H), 1.38 - 1.15 (m, 3 H), 1.01 - 0.92 (m, 1 H);  **$^{13}$ C NMR** (100.6MHz,  $\text{CDCl}_3$ )  $\delta$  = 137.0, 135.8, 133.9, 129.7, 122.7, 120.4, 117.9, 112.2, 111.7, 109.3, 63.1, 41.3, 32.1, 30.2, 28.7, 28.5, 26.0, 26.0, 23.5, 23.4, 22.9, 21.0; **HRMS-APCI** (MeOH,  $m/z$ ):  $[\text{M}+\text{H}]^+$  calcd for  $\text{C}_{22}\text{H}_{29}^{79}\text{BrN}$ , 386.1478; found, 386.1478.  $[\alpha]_D^{25} = +44.04$  ( $c = 0.990$ ,  $\text{CHCl}_3$ ).

The *ee* value of **2d** was measured via its derivative **2dee**, which was derived from **2d** according to the modified literature procedure.<sup>8</sup> In a one neck flask was added **2d** (47.8 mg, 0.1237 mmol), 4-hydroxyphenylboronic acid pinacol ester (27.5 mg, 0.1237 mmol, 1.0 equiv),  $\text{Pd}(\text{PPh}_3)_2\text{Cl}_2$  (4.34 mg, 0.006185 mmol, 5 mol%), XPhos (5.90 mg, 0.01237 mmol, 10 mol%),  $\text{K}_3\text{PO}_4$  (78.77 mg, 0.3711 mmol, 3.0 equiv) and a 2/1 mixture of dioxane/ $\text{H}_2\text{O}$  (3.2 ml) under argon. After stirred the reaction mixture at 90  $^{\circ}$ C overnight, water and saturated solution of  $\text{NH}_4\text{Cl}$  were added. Layers were separated and the aqueous were extracted with ethyl acetate. Combined organic extracts were dried over  $\text{MgSO}_4$ , filtered and concentrated by rotary evaporation. The crude product was purified by FCC on silica gel (EA/PE = 1/9,  $R_f$  = 0.24) to afford the desired product **2dee** as a white solid (40.6 mg, 82 %).

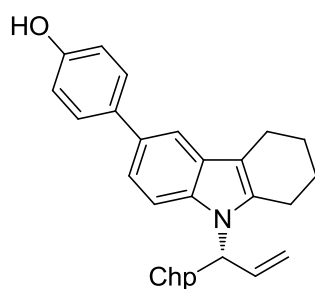

**2dee:**  **$^1$ H NMR** (400MHz,  $\text{CDCl}_3$ )  $\delta$  = 7.60 - 7.59 (m, 1 H), 7.55 - 7.50 (m, 2 H), 7.38 - 7.35 (m, 1 H), 7.29 - 7.26 (m, 1 H), 6.91 - 6.87 (m, 2 H), 6.29 (ddd,  $J$  = 17.1, 10.1, 7.3 Hz, 1 H), 5.16 (dt,  $J$  = 17.1, 1.2 Hz, 1 H), 5.06 (dt,  $J$  = 17.1, 1.2 Hz, 1 H), 4.66 (s, 1 H), 4.38 (m, 1 H), 2.78 - 2.70 (m, 4 H), 2.50 - 2.41 (m, 1 H), 2.03 - 1.92 (m, 3 H), 1.89 - 1.83 (m, 2 H), 1.79 - 1.72 (m, 1 H), 1.65 - 1.45 (m, 5 H), 1.38 - 1.24 (m, 4 H), 1.05 - 0.96 (m, 1 H);  **$^{13}$ C NMR** (100.6MHz,  $\text{CDCl}_3$ )  $\delta$  = 154.1, 136.2, 135.9, 134.5, 131.5, 128.4, 128.4,

119.7, 117.7, 115.8, 115.6, 115.4, 110.9, 109.9, 63.2, 41.4, 32.2, 30.3, 28.8, 28.5, 26.1, 26.0, 23.7, 23.6, 23.1, 21.2; **HRMS-APCI** (MeOH, m/z):  $[M+H]^+$  calcd for calcd for  $C_{28}H_{34}NO$ , 400.2635; found, 400.2636. **m.p.**: 70 - 72 °C; **HPLC** (CHIRALCEL<sup>®</sup> AD-3, *n*-heptane / EtOH = 99:1, 1 mL/min)  $t_R$  = 29.15 min (minor),  $t_R$  = 34.70 min (major), 87% *ee* (**R**)  $[\alpha]_D^{25} = +52.96$  ( $c = 0.995$ ,  $CHCl_3$ ).

**5** (*S*)-2-(4-(6-bromo-3,4-dihydro-1*H*-carbazol-9(2*H*)-yl)hex-5-en-1-yl)isoindoline-1,3-dione (**2e**)

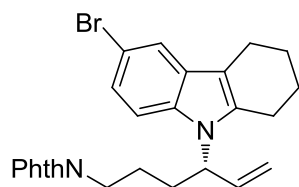

To the crude reaction mixture of **1g** was added cyclohexanone (57  $\mu$ L, 54 mg, 0.55 mmol). The indolization was proceeded for 18 h at 70 °C. The crude product was purified by FCC on silica gel (EA/CH = 1/15,  $R_f = 0.36$ ) to afford the product as a white solid (88.5 mg, 51 %).

**<sup>1</sup>H NMR** (400MHz,  $C_6D_6$ )  $\delta$  = 7.70 (dd,  $J = 2.0, 0.4$  Hz, 1 H), 7.43 - 7.39 (m, 2 H), 7.19 (dd,  $J = 8.7, 2.0$  Hz, 1 H), 6.96 (dd,  $J = 8.7, 0.4$  Hz, 1 H), 6.93 - 6.88 (m, 2 H), 5.69 (ddd,  $J = 17.2, 10.6, 4.6$  Hz, 1 H), 4.86 (ddd,  $J = 10.6, 2.0, 1.1$  Hz, 1 H), 4.75 (ddd,  $J = 17.2, 2.0, 1.1$  Hz, 1 H), 4.48 - 4.42 (m, 1 H), 3.36 - 3.25 (m, 2 H), 2.50 - 2.42 (m, 3 H), 2.34 - 2.27 (m, 1 H), 2.01 - 1.91 (m, 1 H), 1.74 - 1.53 (m, 5 H), 1.40 - 1.20 (m, 2 H); **<sup>13</sup>C NMR** (100.6MHz,  $C_6D_6$ )  $\delta$  = 168.3, 137.7, 137.2, 134.7, 133.9, 132.8, 130.9, 123.9, 123.3, 121.5, 116.2, 113.0, 113.0, 110.4, 56.9, 37.6, 30.4, 25.9, 24.0, 23.8, 23.6, 21.5; **HRMS-APCI** (MeOH, m/z):  $[M+H]^+$  calcd for  $C_{26}H_{26}^{79}BrN_2O_2$ , 477.1178; found, 477.1176. **m.p.**: 50 -51 °C; **HPLC** (CHIRALCEL<sup>®</sup> AD-3, *n*-heptane / EtOH = 98:2, 0.5 mL/min)  $t_R$  = 17.38 min (major),  $t_R$  = 18.93 min (minor), 76% *ee* (**S**);  $[\alpha]_D^{25} = -1.59$  ( $c = 1.005$ ,  $CHCl_3$ ).

**6** (*S*)-methyl 5-(6-bromo-3,4-dihydro-1*H*-carbazol-9(2*H*)-yl)hept-6-enoate (**2f**)

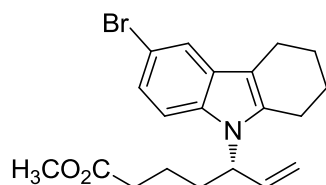

To the crude reaction mixture of **1k** was added cyclohexanone (57  $\mu$ L, 54 mg, 0.55 mmol). The indolization was proceeded for 18 h at 70 °C. The crude product was purified by FCC on silica gel (EA/CH = 1/30,  $R_f = 0.14$ ) to afford the product as a yellowish oil (143.9 mg, 74 %).

**<sup>1</sup>H NMR** (400MHz, CDCl<sub>3</sub>) δ = 7.57 (dd, *J* = 1.7, 0.8 Hz, 1 H), 7.16 (dd, *J* = 8.7, 0.8 Hz, 1 H), 7.13 (dd, *J* = 8.7, 1.7 Hz, 1 H), 6.09 (ddd, *J* = 17.2, 10.5, 4.7 Hz, 1 H), 5.19 (ddd, *J* = 10.5, 2.0, 0.9 Hz, 1 H), 5.02 (ddd, *J* = 17.2, 2.0, 0.9 Hz, 1 H), 4.82 - 4.76 (m, 1 H), 3.62 (s, 3 H), 2.73 - 2.64 (m, 4 H), 2.24 (dt, *J* = 7.3, 0.9 Hz, 2 H), 2.20 - 2.11 (m, 1 H), 2.08 - 1.99 (m, 1 H), 1.96 - 1.89 (m, 2 H), 1.88 - 1.81 (m, 2 H), 1.65 - 1.53 (m, 1 H), 1.38 - 1.27 (m, 1 H); **<sup>13</sup>C NMR** (100.6MHz, CDCl<sub>3</sub>) δ = 173.5, 136.9, 136.9, 133.8, 129.9, 122.9, 120.5, 116.2, 112.2, 111.9, 109.6, 56.7, 51.5, 33.4, 32.2, 23.3, 23.3, 22.9, 21.9, 20.9; **HRMS-APCI** (MeOH, *m/z*): [M+H]<sup>+</sup> calcd for C<sub>20</sub>H<sub>25</sub><sup>79</sup>BrNO<sub>2</sub>, 390.1063; found, 390.1063. **HPLC** (CHIRALCEL<sup>®</sup> OD-3, *n*-heptane / <sup>*i*</sup>PrOH = 200:1, 1 mL/min) *t<sub>R</sub>* = 9.66 min (major), *t<sub>R</sub>* = 11.18 min (minor), 81% *ee* (**S**); [α]<sub>D</sub><sup>25</sup> = + 15.51 (c = 0.980, CHCl<sub>3</sub>).

**7** (**S**)-5-bromo-1-(1-cyclohexylallyl)-3-phenyl-1*H*-indole (**2g**)

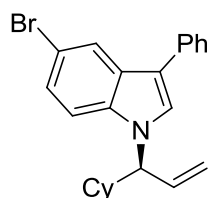

To the crude reaction mixture of **1a** was added phenylacetaldehyde (64 μl, 62 mg, 0.55 mmol). The indolization was proceeded for 18 h at 70 °C. The crude product was purified by FCC on silica gel (CH = 1/30, *R<sub>f</sub>* = 0.29) to afford the product as a yellowish oil (160.0 mg, 81 %).

**<sup>1</sup>H NMR** (400MHz, CDCl<sub>3</sub>) δ = 8.05 - 8.05 (m, 1 H), 7.64 - 7.61 (m, 2 H), 7.47 - 7.43 (m, 2 H), 7.34 - 7.27 (m, 4 H), 6.12 (ddd, *J* = 17.1, 10.3, 7.4 Hz, 1 H), 5.24 (ddd, *J* = 10.3, 1.1 Hz, 1 H), 5.16 (ddd, *J* = 17.1, 1.1 Hz, 1 H), 4.52 - 4.48 (m, 1 H), 2.00 - 1.90 (m, 2 H), 1.84 - 1.77 (m, 1 H), 1.70 - 1.61 (m, 2 H), 1.41 - 1.35 (m, 1 H), 1.34 - 1.20 (m, 1 H), 1.19 - 1.02 (m, 3 H), 0.95 - 0.85 (m, 1 H); **<sup>13</sup>C NMR** (100.6MHz, CDCl<sub>3</sub>) δ = 135.8, 135.5, 135.0, 128.8, 127.7, 127.4, 126.1, 124.6, 124.2, 122.5, 118.1, 117.0, 113.2, 111.5, 64.7, 41.9, 30.6, 29.8, 26.2, 25.9, 25.8; **HRMS-APCI** (MeOH, *m/z*): [M+H]<sup>+</sup> calcd for C<sub>23</sub>H<sub>25</sub><sup>79</sup>BrN, 394.1170; found, 394.1174. [α]<sub>D</sub><sup>25</sup> = - 34.83 (c = 1.025, CHCl<sub>3</sub>).

The *ee* value of **2g** was measured via its derivative **2gee**, which was derived from **2g** according to the literature procedure (white solid, 39.4 mg, 76 %).<sup>9</sup>

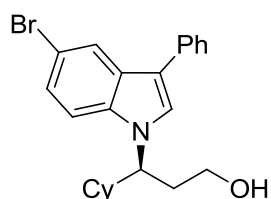

(*S*)-3-(5-bromo-3-phenyl-1*H*-indol-1-yl)-3-cyclohexylpropan-1-ol (**2gee**): <sup>1</sup>H NMR (400MHz, CDCl<sub>3</sub>) δ = 8.06 - 8.05 (m, 1 H), 7.64 - 7.61 (m, 2 H), 7.47 - 7.43 (m, 2 H), 7.32 - 7.28 (m, 4 H), 4.30 (m, 1 H), 3.52 (ddd, *J* = 10.0, 6.1, 3.8 Hz, 1 H), 3.19 (ddd, *J* = 10.0, 10.0, 4.7 Hz, 1 H), 2.34 - 2.27 (dddd, *J* = 14.4, 10.0, 6.1, 3.5 Hz, 1 H), 2.05 - 1.95 (m, 2 H), 1.85 - 1.78 (m, 2 H), 1.67 - 1.60 (m, 2 H), 1.33 - 1.23 (m, 3 H), 1.17 - 1.04 (m, 3 H), 0.93 - 0.85 (m, 1 H); <sup>13</sup>C NMR (100.6MHz, CDCl<sub>3</sub>) δ = 134.9, 128.8, 127.3, 127.2, 126.1, 124.7, 122.4, 117.1, 113.2, 111.5, 59.2, 58.1, 43.3, 34.6, 30.7, 29.7, 26.2, 26.0, 25.9; HRMS-APCI (MeOH, *m/z*): [M+H]<sup>+</sup> calcd for C<sub>23</sub>H<sub>27</sub>BrNO, 412.1271; found, 412.1271. **m.p.**: 86 - 87 °C; HPLC (CHIRALCEL<sup>®</sup> AD-3, *n*-heptane / EtOH = 95:5, 1 mL/min) *t<sub>R</sub>* = 4.48 min (major), *t<sub>R</sub>* = 5.24 min (minor), 90% *ee* (*S*); [α]<sub>D</sub><sup>25</sup> = 14.80 (c = 1.00, CHCl<sub>3</sub>).

**8** (*S*)-2-benzyl-5-bromo-1-(1-cyclohexylallyl)-3-phenyl-1*H*-indole (**2h**)

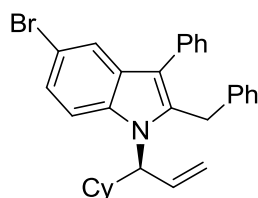

To the crude reaction mixture of **1a** was added 1,3-diphenyl-2-propanone (116 mg, 0.55 mmol). The indolization was proceeded for 18 h at 70 °C. The crude product was purified by FCC on silica gel (CH = 1/30, *R<sub>f</sub>* = 0.34) to afford the product as a white solid (172.0 mg, 71 %).

<sup>1</sup>H NMR (400MHz, CDCl<sub>3</sub>) δ = 7.80 (m, 1H), 7.52 - 7.50 (m, 2 H), 7.46 - 7.42 (m, 2 H), 7.35 - 7.21 (m, 6 H), 7.15 - 7.13 (m, 2 H), 6.13 (m, 1 H), 4.96 (m, 1 H), 4.38 (m, 2 H), 4.31 - 4.27 (m, 1 H), 4.14 (d, *J* = 16.8 Hz, 1 H), 2.19 - 2.09 (m, 1 H), 1.94 - 1.91 (m, 1 H), 1.78 - 1.75 (m, 1 H), 1.65 - 1.63 (m, 1 H), 1.55 - 1.52 (m, 1 H), 1.29 - 1.19 (m, 1 H), 1.12 - 0.96 (m, 3 H), 0.88 - 0.78 (m, 1 H), 0.60 - 0.50 (m, 1 H); <sup>13</sup>C NMR (100.6MHz, CDCl<sub>3</sub>) δ = 138.9, 136.5, 134.8, 133.9, 133.6, 129.8, 129.7, 128.6, 128.6, 128.6, 126.5, 126.5, 123.9, 121.9, 118.4, 116.0, 113.5, 112.9, 64.5, 40.0, 31.6, 31.4, 29.7, 26.2, 26.0, 25.9; HRMS-APCI (MeOH, *m/z*): [M+H]<sup>+</sup> calcd for C<sub>30</sub>H<sub>31</sub><sup>79</sup>BrN, 484.1634; found, 484.1638. **m.p.**: 83 - 84 °C; HPLC (CHIRALCEL<sup>®</sup> L-C3 + OJ-R, MeCN / H<sub>2</sub>O = 75:25, 0.5 mL/min) *t<sub>R</sub>* = 37.29 min (major), *t<sub>R</sub>* = 42.09 min (minor), 91% *ee* (*S*); [α]<sub>D</sub><sup>25</sup> = + 12.54 (c = 1.005, CHCl<sub>3</sub>).

**9** (*S*)-8-bromo-5-(1-cyclohexylallyl)-1,3,4,5-tetrahydrothiopyrano[4,3-*b*]indole (**2i**)

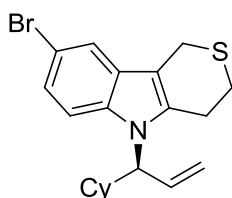

To the crude reaction mixture of **1a** was added tetrahydro-4*H*-thiopyran-4-one (63.9 mg, 0.55 mmol). The indolization was proceeded for 18 h at 100 °C. The crude product was purified by FCC on silica gel (Tol/CH = 1/9,  $R_f = 0.29$ ) to afford the product as a yellowish oil (85.1 mg, 44 %).

**$^1\text{H}$  NMR** (400MHz,  $\text{CDCl}_3$ )  $\delta = 7.57$  (dd,  $J = 1.9, 0.6$  Hz, 1 H),  $7.22$  (dd,  $J = 8.7, 0.6$  Hz, 1 H),  $7.18$  (dd,  $J = 8.7, 1.9$  Hz, 1 H),  $6.25$  (ddd,  $J = 17.0, 10.4, 6.6$  Hz, 1 H),  $5.19$  (dt,  $J = 10.4, 1.3$  Hz, 1 H),  $4.98$  (dt,  $J = 17.0, 1.3$  Hz, 1 H),  $4.32$  (dd,  $J = 10.4, 6.6$  Hz, 1 H),  $3.82$  (m, 2 H),  $3.04 - 2.90$  (m, 4 H),  $2.19 - 2.09$  (m, 1 H),  $2.08 - 2.01$  (m, 1 H),  $1.85 - 1.78$  (m, 1 H),  $1.70 - 1.63$  (m, 1 H),  $1.60 - 1.54$  (m, 1 H),  $1.35 - 1.24$  (m, 1 H),  $1.18 - 0.96$  (m, 4 H),  $0.77 - 0.66$  (m, 1 H);  **$^{13}\text{C}$  NMR** (100.6MHz,  $\text{CDCl}_3$ )  $\delta = 136.1, 134.7, 133.0, 129.0, 123.5, 120.3, 118.1, 112.7, 112.2, 106.2, 63.5, 40.1, 31.5, 29.9, 26.2, 26.0, 25.9, 25.8, 25.3, 23.0$ ; **HRMS-APCI** (MeOH,  $m/z$ ):  $[\text{M}+\text{H}]^+$  calcd for  $\text{C}_{20}\text{H}_{25}^{79}\text{BrNS}$ , 390.0886; found, 390.0888. **HPLC** (CHIRALCEL<sup>®</sup> OJ-3R, MeCN /  $\text{H}_2\text{O} = 60:40, 0.5$  mL/min)  $t_R = 49.36$  min (minor),  $t_R = 55.45$  min (major), 90% *ee* (**S**);  $[\alpha]_D^{25} = +63.90$  ( $c = 0.975, \text{CHCl}_3$ ).

### One-pot Late-stage Indolization of (+)-Testosterone acetate

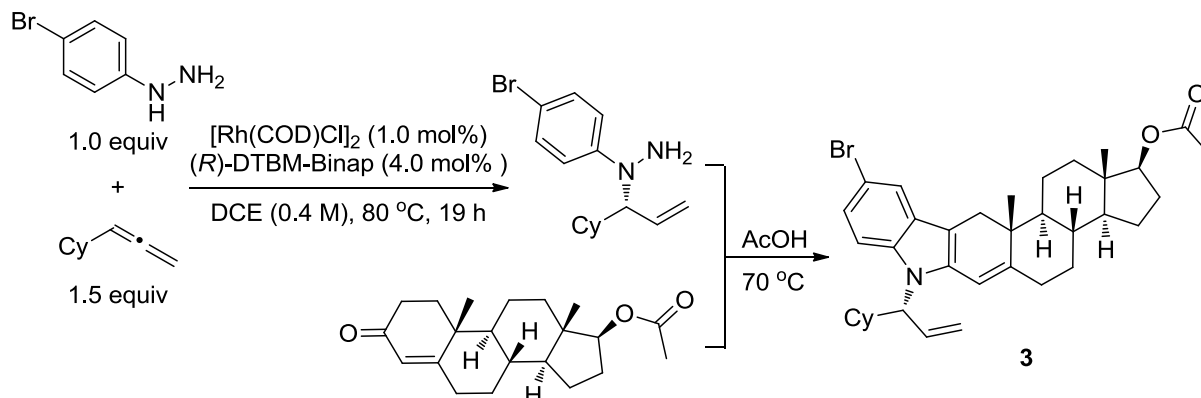

A 25 ml screw-cap Schlenk round bottom flask was flame-dried under vacuum, backfilled with argon and cooled to room temperature using a standard S4 Schlenk line apparatus. To the screw-cap Schlenk flask was charged with  $[\text{Rh}(\text{COD})\text{Cl}]_2$  (14.8 mg, 0.03 mmol, 1 mol%), *(R)*-DTBM-Binap (143 mg, 0.12 mmol, 4 mol%), *p*-bromophenylhydrazine (561.1 mg, 3.0 mmol, 1.0 equiv), 1,2-dichloroethane (7.5 ml, 0.4 M) and cyclohexylallene (655.5  $\mu\text{l}$ , 4.5 mmol, 1.5 equiv). The flask was then sealed and the mixture was stirred for 19 h at 80 °C. After cooling to room temperature, acetyl testosterone (1.1 g, 3.3 mmol, 1.1 equiv) was added to the reaction mixture and stirred for 30 min to form the corresponding hydrazone. The solvent was removed by rotary evaporation, and then acetic acid (12 ml, 0.25 M) was added. After stirring for 18 h at 70 °C, the volatiles were removed under vacuum, and the crude product was purified by FCC on silica gel (EA/CH = 1/30,  $R_f$  = 0.24) to afford the product as a yellow solid (1.06 g, 59 %, *d.r.* = 1/17, determined by  $^1\text{H}$  NMR).

$^1\text{H}$  NMR (400MHz,  $\text{CDCl}_3$ , mixture of two diastereomers)  $\delta$  = 7.96 (d,  $J$  = 1.8 Hz, 1 H), 7.22 (d,  $J$  = 8.7 Hz, 1 H), 7.18 (dd,  $J$  = 8.7, 1.8 Hz, 1 H), 6.28 (ddd,  $J$  = 17.0, 10.4, 6.6 Hz, 1 H, minor), 6.24 (ddd,  $J$  = 17.0, 10.3, 6.5 Hz, 1 H, major), 6.09 - 6.08 (m, 1 H), 5.21 (dt,  $J$  = 10.4, 1.3 Hz, 1 H, minor), 5.17 (dt,  $J$  = 10.3, 1.3 Hz, 1 H, major), 5.04 (dt,  $J$  = 17.0, 1.3 Hz, 1 H, minor), 4.96 (dt,  $J$  = 17.0, 1.3 Hz, 1 H, major), 4.66 (dd,  $J$  = 9.1, 7.7 Hz, 1 H), 4.39 - 4.34 (m, 1 H), 2.86 - 2.81 (m, 1 H), 2.73 - 2.64 (m, 1 H), 2.41 - 2.35 (m, 1 H), 2.26 - 2.02 (m, 5 H), 2.06 (s, 3H), 1.85 - 1.62 (m, 8 H), 1.61 - 1.52 (m, 4 H), 1.50 - 1.35 (m, 2 H), 1.34 - 1.22 (m, 2 H), 1.20 - 1.00 (m, 7 H), 0.98 (s, 3H), 0.87 (s, 3H), 0.79 - 0.68 (m, 1 H);  $^{13}\text{C}$  NMR (100.6MHz,  $\text{CDCl}_3$ , 323 K) (major)  $\delta$  = 171.1, 137.7, 136.5, 134.8, 127.6, 123.1, 122.5, 117.9, 116.3, 112.7, 109.8, 82.7, 63.5, 51.2, 48.4, 42.4, 39.9, 36.9, 36.4, 34.6, 31.7, 31.4, 31.4, 29.8, 27.6, 26.2, 25.9, 25.7, 23.6, 21.1, 21.0, 20.8, 18.4, 12.0; (minor)  $\delta$  = 171.1, 137.7, 136.7, 134.5, 127.7, 123.0, 122.5, 118.2, 116.4, 112.7,



109.6, 82.7, 63.5, 51.2, 48.3, 42.4, 39.9, 36.9, 36.3, 34.7, 31.7, 31.4, 31.4, 29.7, 27.6, 26.2, 25.9, 25.8, 23.6, 21.1, 21.0, 20.8, 18.4, 12.0; **HRMS-APCI** (m/z): [M+H]<sup>+</sup> calcd for C<sub>36</sub>H<sub>47</sub><sup>79</sup>BrNO<sub>2</sub>, 604.2785; found, 604.2786. **m.p.**: 190 - 191 °C; [α]<sub>D</sub><sup>25</sup> = + 9.95 (c = 0.995, CHCl<sub>3</sub>).

### Mechanistic Investigations

#### Reaction of 1-methyl-1-phenylhydrazine with cyclohexylallene

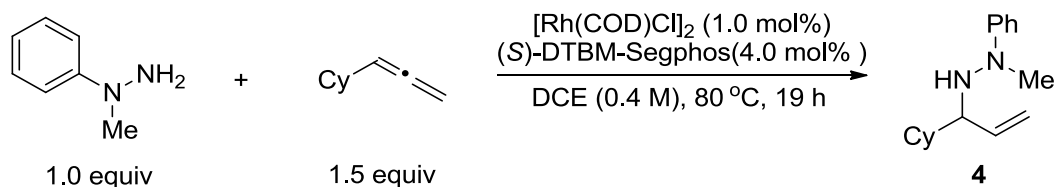

The reaction was performed in a 5.0 ml Schlenk tube under argon. [Rh(COD)Cl]<sub>2</sub> (2.5 mg, 0.005 mmol, 1.0 mol%), (S)-DTBM-Segphos (23.6 mg, 0.02 mmol, 4.0 mol%), and 1-methyl-1-phenylhydrazine (61.1 mg, 0.5 mmol, 1.0 equiv) were dissolved in DCE (1.25 mL), then cyclohexylallene (91.6 mg, 0.75 mmol, 1.5 equiv.) was added and the tube was sealed. The reaction mixture was stirred at 80 °C for 19 hours. After cooling to room temperature, the solvent was removed by rotary evaporation. The crude reaction mixture was analyzed by <sup>1</sup>H NMR, which indicated only trace of product formation.

#### Isotopic-labeling experiment with [D<sub>3</sub>]phenyl hydrazine

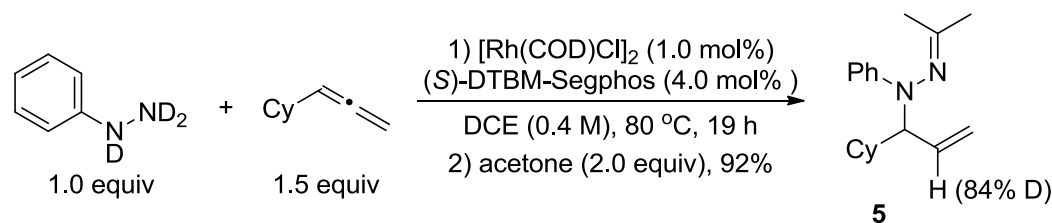

The reaction was performed in a 5.0 ml Schlenk tube under argon. [Rh(COD)Cl]<sub>2</sub> (2.5 mg, 0.005 mmol, 1.0 mol%), (S)-DTBM-Segphos (23.6 mg, 0.02 mmol, 4.0 mol%), and [D<sub>3</sub>]Phenylhydrazine (55.6 mg, 0.5 mmol, 1.0 equiv) were dissolved in DCE (1.25 mL), then cyclohexylallene (91.6 mg, 0.75 mmol, 1.5 equiv.) was added and the tube was sealed. The reaction mixture was stirred at 80 °C for 19 hours. After cooling to room temperature, the solvent was removed by rotary evaporation. To the reaction residue was added acetone (74 μL, 58.1 mg, 1.0 mmol, 2.0 equiv) to mask the -ND<sub>2</sub> group via hydrazone formation. The crude product was purified by flash column chromatography on silica gel (EA / CH = 1:30, R<sub>f</sub> = 0.35) to afford the product as a yellowish oil (125.0 mg, 92%).

The corresponding non-deuterated hydrazone of **5** was prepared by reaction of **1a** with acetone. Analytical data of the non-deuterated hydrazone of **5**. <sup>1</sup>H NMR (400 MHz, CDCl<sub>3</sub>) δ = 7.21 - 7.15 (m, 2 H), 6.82 (tt, *J* = 1.2, 7.3 Hz, 1 H), 6.79 - 6.74 (m, 2 H), 6.11 (ddd, *J* = 9.1, 10.3, 17.4 Hz, 1 H), 5.04 - 4.93 (m, 1 H), 4.74 (ddd, *J* = 0.7, 2.2, 17.3 Hz, 1 H), 3.54 (t, *J* = 9.4 Hz, 1 H), 2.08 (s, 3 H), 2.01 - 1.93 (m, 1 H), 1.80 - 1.55 (m, 8 H), 1.31 - 1.16 (m, 3 H), 1.09 - 0.97 (m, 1 H), 0.94 - 0.81 (m, 1 H); <sup>13</sup>C NMR (101 MHz, CDCl<sub>3</sub>) δ = 167.0, 151.3, 137.0, 128.7, 120.6, 119.6, 117.0, 39.6, 30.9, 30.8, 26.9, 26.3, 26.2, 25.1, 20.0; HRMS-APCI (MeOH, *m/z*): [M+H]<sup>+</sup> C<sub>16</sub>H<sub>27</sub>N<sub>2</sub>, 271.21688; found, 272.21698.

Mass analysis of **5** gave the following deuterium distribution

| <b>d<sub>n</sub></b> (Number of deuterium incorporated) | <b>Relative Distribution (%)</b> |
|---------------------------------------------------------|----------------------------------|
| <b>d<sub>0</sub></b>                                    | 18                               |
| <b>d<sub>1</sub></b>                                    | 82                               |

#### **Stoichiometric Reaction of phenylhydrazine with catalysts**

To a dry J. Young NMR tube was added [Rh(COD)Cl]<sub>2</sub> (24.6 mg, 0.05 mmol), DPEphos (53.9 mg, 0.1 mmol) and phenylhydrazine (10.8 mg, 0.1 mmol), then CDCl<sub>3</sub> (1.0 ml) was added. The tube was sealed under argon and shaken for 5 min. The sample was analysed by NMR at 263K.

## Supplementary References

1. Coleman, G. H. Phenylhydrazine. *Org. Synth.* **2**, 71, (1941).
2. Taherirastgar, F., Brandsma, L. Conversion of Alkyl- and Arylallenes into 1-Alkynes through Metallated Intermediates. *Synth. Commun.* **27**, 4035, (1997).
3. Xu, K., Thieme, N., Breit, B. Atom-Economic, Regiodivergent, and Stereoselective Coupling of Imidazole Derivatives with Terminal Allenes. *Angew. Chem. Int. Ed.* **53**, 2162, (2014).
4. Kuang, J., Ma, S. An Efficient Synthesis of Terminal Allenes from Terminal 1-Alkynes. *J. Org. Chem.* **74**, 1763, (1999).
5. Johns, A. M., Liu, Z., Hartwig, J. F. Primary *tert*- and *sec*-Allylamines via Palladium-Catalyzed Hydroamination and Allylic Substitution with Hydrazine and Hydroxylamine Derivatives. *Angew. Chem. Int. Ed.* **46**, 7259, (2007).
6. Cooke, M. L., Xu, K., Breit, B. Enantioselective Rhodium-Catalyzed Synthesis of Branched Allylic Amines by Intermolecular Hydroamination of Terminal Allenes. *Angew. Chem. Int. Ed.* **51**, 10876, (2012).
7. Bailey, W. F., Luderer, M. R., Jordan, K. P. Effect of Solvent on the Lithium-Bromine Exchange of Aryl Bromides: Reactions of *n*-Butyllithium and *tert*-Butyllithium with 1-Bromo-4-*tert*-butylbenzene at 0 °C. *J. Org. Chem.* **71**, 2825, (2006).
8. Akwabi-Ameyaw, A., Caravella, J. A., Chen, L., Creech, K. L., Deaton, D. N., Madauss, K. P., Marr, H. B., Miller, A. B., Navas III, F., Parks, D. J., Spearing, P. K., Todd, D., Williams, S. P., Wisely, G. B. Conformationally Constrained Farnesolid X Receptor (FXR) Agonists: Alternative Replacements of the Stilbene. *Bioorg. Med. Chem. Lett.* **21**, 6154, (2011).
9. Stanley, L. M., Hartwig, J. F. Iridium-Catalyzed Regio- and Enantioselective N-Allylation of Indoles. *Angew. Chem. Int. Ed.* **48**, 7841, (2009).
